# Supplementary material
Source: Research Square preprint supplement (doi:10.21203/rs.3.rs-8823291/v1)
Supplement: Supplementary file 1 [file 2c37a345a8d5dad4a423e8ba.docx]

Supplemental material: Malaria Vaccine Implementation Program Reduced Clinical Malaria, Kenya

Impact evaluation with predictive time-series models of routine surveillance data

June 5, 2025

Table of contents

[Supplement A: R Environment 3](#_Toc221442450)

[Supplement B: Expected impact 5](#_Toc221442451)

[Supplement C: Data Sources 10](#_Toc221442452)

[Data Dictionary 10](#_Toc221442453)

[API Data Download 11](#_Toc221442454)

[Organisational units (orgUnits) 12](#_Toc221442455)

[Supplement D: Enrolled Health Care Facilities 13](#_Toc221442456)

[MVIP Areas 13](#_Toc221442457)

[MVIP Health Facilities 17](#_Toc221442458)

[Supplement E: Vaccine Doses 30](#_Toc221442459)

[Supplement F: Confirmed Cases 34](#_Toc221442460)

[Confirmed Malaria Cases (Kenya Health Information System) 34](#_Toc221442461)

[MVIP Clinical Cases: Filter to cases reported by health facilities and CHW in MVIP sub-counties (mcc0) 35](#_Toc221442462)

[Identify potential outliers 39](#_Toc221442463)

[Create mcc3 with new variables for case type (OPD, CHW) 40](#_Toc221442464)

[Associate CHW cases with their corresponding OPD, creating a new variable, opdUnit 41](#_Toc221442465)

[Aggregate across opdUnits (mcc4) 42](#_Toc221442466)

[Supplement G: Consistently Reporting Facilities 44](#_Toc221442467)

[Facilities reporting confirmed malara cases 44](#_Toc221442468)

[Facilities Consistently Reporting Confirmed Cases Each Month 48](#_Toc221442469)

[Consistent reporting pre-intervention through the evaluation period 48](#_Toc221442470)

[Map of included facilities (preliminary) 51](#_Toc221442471)

[With the choice of number of facilities, we save the analytic Dataset (mcc5) 53](#_Toc221442472)

[Consistently_reporting_evaluation_facilities (12/12 months during evaluation period) (mcc6) 56](#_Toc221442473)

[Map of included facilities (final) 58](#_Toc221442474)

[Supplement H: Time-series models of uncomplicated cases to estimate vaccine impact 60](#_Toc221442475)

[Analyses 60](#_Toc221442476)

[Time-Periods 63](#_Toc221442477)

[Time-Series Models (Mables) 65](#_Toc221442478)

[Validation 65](#_Toc221442479)

[Validation Algorithm: Optimizing versus Synchronizing 70](#_Toc221442480)

[Model Selection - Pre-intervention 71](#_Toc221442481)

[Impact 72](#_Toc221442482)

[Grand Summary 82](#_Toc221442483)

[Supplement I: Impact of distance from comparison to implementing facilities 83](#_Toc221442484)

[Distance-dose response 83](#_Toc221442485)

[Supplement J: Alternative Modeling Scenarios 95](#_Toc221442486)

[Alternative Data and Modelling Scenarios 95](#_Toc221442487)

[Data 95](#_Toc221442488)

[Raw data 95](#_Toc221442489)

[Cleaned data: All facilities with outliers removed and CHEW associated with OPD (mcc4) and Over4 covariate 109](#_Toc221442490)

[Adjusted data (mcc5) 121](#_Toc221442491)

[Always reporting from 2020 (mcc6), consistentently reporting since 2015 126](#_Toc221442492)

[Always reporting from since 2015 (mcc7) 126](#_Toc221442493)

[Adjusted, Primary models only 131](#_Toc221442494)

[Adjusted, ‘Optimized’ models 135](#_Toc221442495)

[Adjusted, ‘Optimized’ Primary models 139](#_Toc221442496)

[Ratio of under5 to over4 cases 144](#_Toc221442497)

[Health Facility based models 145](#_Toc221442498)

[Summary 145](#_Toc221442499)

[**References** 150](#_Toc221442500)

#

# Supplement A: R Environment

Data were prepared and analysed in RStudio 2024.4.0.735[[1](#X93e79e1a5ab79bb153842a6d1ed7d5e5cb3185f)] running R version 4.4.1 with the following packages installed:

| Package | Version |
| --- | --- |
| coin | 1.4-3 |
| conflicted | 1.2.0 |
| cowplot | 1.2.0 |
| data.table | 1.17.8 |
| data.tree | 1.2.0 |
| distributional | 0.5.0 |
| DT | 0.34.0 |
| fable | 0.4.1 |
| fable.prophet | 0.1.0 |
| fabletools | 0.5.1 |
| feasts | 0.4.2 |
| fitdistrplus | 1.2-4 |
| flextable | 0.9.10 |
| forecast | 8.24.0 |
| fuzzyjoin | 0.1.6.1 |
| ggpattern | 1.2.1 |
| ggrepel | 0.9.6 |
| ggspatial | 1.1.10 |
| ggthemes | 5.2.0 |
| glue | 1.8.0 |
| gridExtra | 2.3 |
| gt | 1.1.0 |
| gtsummary | 2.4.0 |
| HDInterval | 0.2.4 |
| htmltools | 0.5.8.1 |
| igraph | 2.2.1 |
| kableExtra | 1.4.0 |
| knitr | 1.50 |
| leaflegend | 1.2.1 |
| leaflet | 2.2.3 |
| leaflet.extras | 2.0.1 |
| lubridate | 1.9.4 |
| lwgeom | 0.2-14 |
| magick | 2.9.0 |
| maps | 3.4.3 |
| MLmetrics | 1.1.3 |
| nngeo | 0.4.8 |
| overlapping | 2.2 |
| pacman | 0.5.1 |
| progress | 1.2.3 |
| readxl | 1.4.5 |
| scales | 1.4.0 |
| sf | 1.0-23 |
| stringr | 1.6.0 |
| table.express | 0.4.2 |
| tictoc | 1.2.1 |
| tidyfst | 1.8.2 |
| tidyverse | 2.0.0 |
| tsibble | 1.1.6 |
| webshot | 0.5.5 |
| webshot2 | 0.1.2 |

# Supplement B: Expected impact

The following assumptions were used to calculate the expected impact of RTS,S on uncomplicated malaria.

#### Immunization Schedule

| 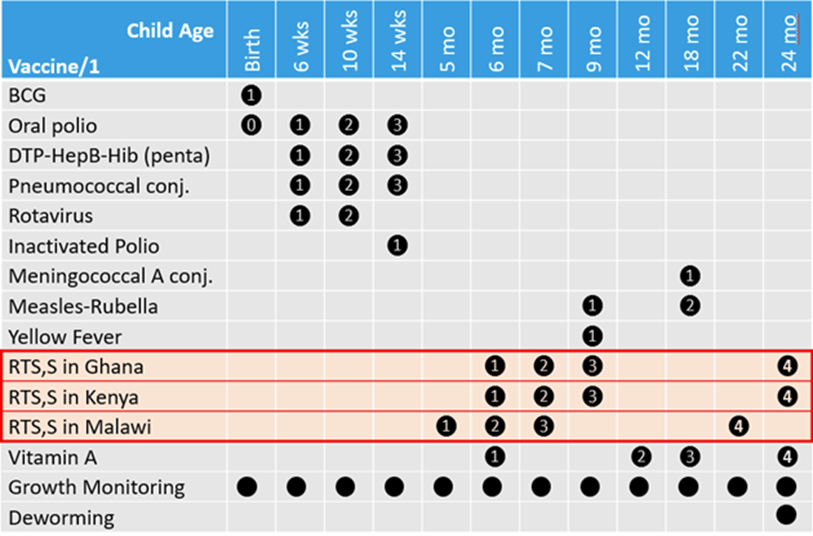  **Figure** 1**.S** Immunization schedule, including RTS,S/AS01E In the three MVIP countries (Source: WHO MVIP SAP available at <https://cdn.clinicaltrials.gov/large-docs/65/NCT03806465/SAP_002.pdf>). |
| --- |

#### Vaccine Eligibility

| 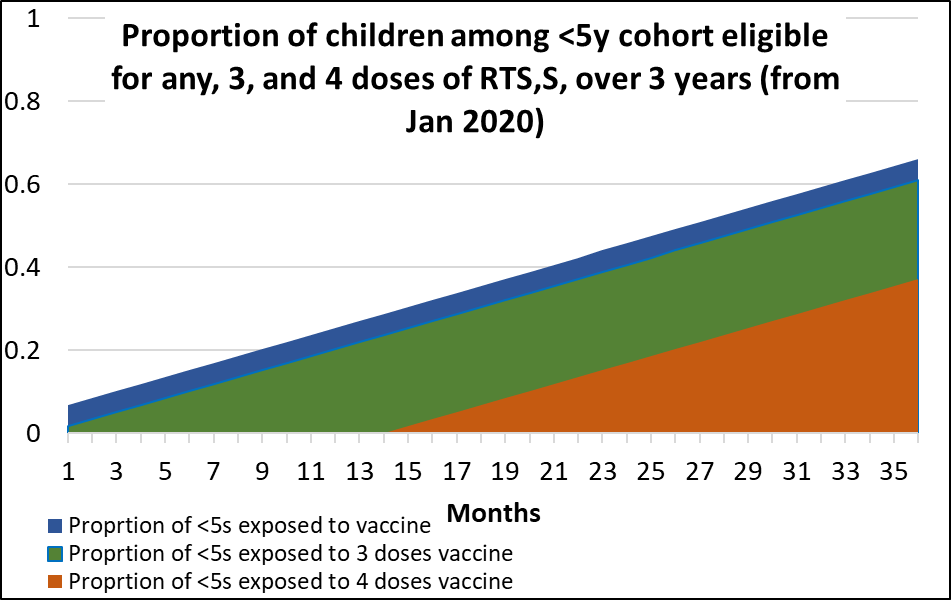  **Figure** 2**.S** The proportion of all <5y children that were eligible for malaria vaccine started small and increased to 65% after 36 months post-introduction of RTS,S. |
| --- |

#### Vaccine Coverage

From the the western Kenya MVIP feasibility surveys, RTS,S coverage estimates among eligible children were 82.7% for dose 1, 78.1% for dose 2, 68.9% for dose 3, and 34.0% for dose 4. However, the eligible children were approximately 1/5 of all the children <5. [Table 1](#tbl-coverage) shows the estimate proportion of children <5 that received 3 or 4 doses following the introduction of RTS,S.

| Table 1**.S** Percent of under 5 population vaccinated by months since last dose   | Months since last dose | Year 1 | Year 2 | Year 3 | | --- | --- | --- | --- | | 6m post vx with 3 doses | 13.1% | 15.4% | 13.1% | | 18m post vx with 3 doses | - | 7.2% | 7.2% | | 30m post vx with 3 doses | - | - | 7.2% | | 6m post vx with 4 doses | - | 5.9% | 7.2% | | 18m post vx with 4 doses | - | - | 5.9% | |
| --- | --- | --- | --- | --- | --- | --- | --- | --- | --- | --- | --- | --- | --- | --- | --- | --- | --- | --- | --- | --- | --- | --- | --- | --- |

#### Vaccine Efficacy

Vaccine efficacy decreases over time. [Table 2](#tbl-vxefficacy) shows the vaccine efficacy for children receiving 3 and 4 does of RTS,S/AS01E. The values were either reported from phase III trials in malaria endemic regions,[[2](#ref-rtsEfficacySafetyRTS2014),[3](#X2214468b2cc2dcb7c5afc9593ce5319dbe5b9a7)]. We assumed there was no efficacy unless children received at least 3 doses of RTS,S/AS01E.

| Table 2**.S** Vaccine efficacy reported from phase III trials or imputed(*)   | Months since last dose | 3 doses | 4 doses | | --- | --- | --- | | 6m post vx | 68.3% | 68.3% | | 18m post vx | 45.1% | 45.1% | | 30m post vx | 35.2% | 43.9% | | 48m post vx | 28.3% | 36.0% | |
| --- | --- | --- | --- | --- | --- | --- | --- | --- | --- | --- | --- | --- | --- | --- | --- |

### Potential Impact

a = vxcov %>%
 mutate( x = str_split( `Months since last dose`, " with ") ,
 months = map_chr( x, 1 ) ,
 doses = map_chr( x, 2 )) %>%
 pivot_longer( c(`Year 1`, `Year 2`,`Year 3`) ) %>%
 select( -x ) %>%
 rename( year = name , coverage = value )

# a %>% flextable() %>% FitFlextableToPage()

b = eff %>%
 pivot_longer( c( `3 doses`, `4 doses` ) ) %>%
 rename( months = `Months since last dose` ,
 eff = value ,
 doses = name )

# b %>% flextable() %>% FitFlextableToPage()


c = a %>% inner_join( b , by = join_by(months, doses) ) %>%
 mutate( impact = coverage * eff ) %>%
 select( - `Months since last dose` )

# c %>% flextable() %>% FitFlextableToPage()

d = c %>%
 select( - eff, - coverage ) %>%
 pivot_wider( id_cols = c( months, doses ) , values_from = impact, names_from = year) %>%
 bind_rows(summarise(.,
 across( where(is.numeric) , ~ sum( .x, na.rm = T )),
 across( where(is.character) , ~ "Total"))) %>%
 mutate( across( where( is.numeric ), ~ ifelse( is.na(.), "-", paste0(round(100 * ., 1), "%"))) )

saveRDS( d, paste0( params$output , "expected_impact.rds"))

| months | doses | Year 1 | Year 2 | Year 3 |
| --- | --- | --- | --- | --- |
| 6m post vx | 3 doses | 8.9% | 10.5% | 8.9% |
| 18m post vx | 3 doses | - | 3.2% | 3.2% |
| 30m post vx | 3 doses | - | - | 2.5% |
| 6m post vx | 4 doses | - | 4% | 4.9% |
| 18m post vx | 4 doses | - | - | 2.7% |
| Total | Total | 8.9% | 17.8% | 22.3% |

| 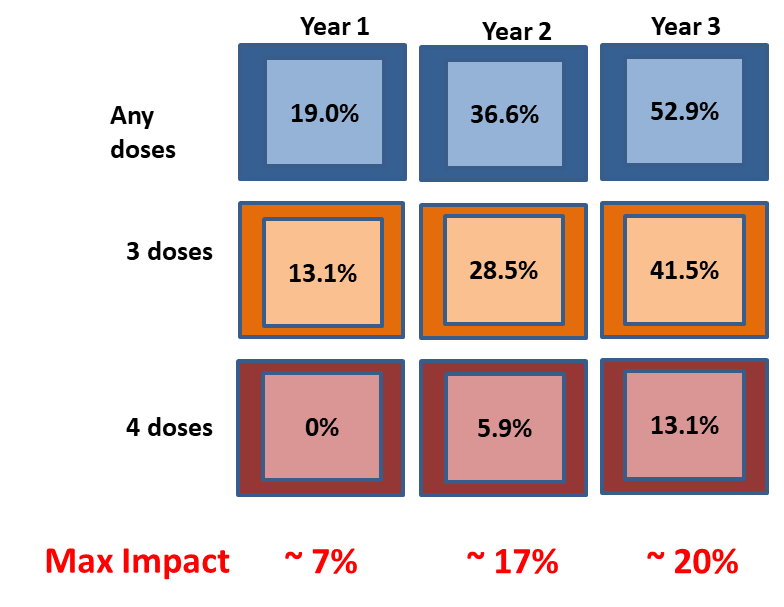  **Figure** 3**.S** Percent of children under 5 vaccinated (assuming coverage of 80% for RTSS1, 70% for RTSS3, and 35% for RTSS4) and percent impact of disease reduction among children under 5 (assuming vaccine efficacy as shown in [Table 2](#tbl-vxefficacy)) |
| --- |

# Supplement C: Data Sources

## Data Dictionary

We reviewed available data in the Kenya DHIS2 that represented monthly reporting of uncomplicated cases. [Table 3](#tbl-data-dictionary) lists 5 monthly data elements with disaggregations that were included in the study dataset. Two of the three elements represent clinical cases reported by health facilities for persons <5 yrs and >=5 yrs. Three of the five represent clinical cases reported by community health education workers (CHEW). Prior to 2020 [NB: check date], CHEW reported confirmed malaria without an age disaggregation. For this study, we categorized those cases as <5 so that they could be used to establish trends in <5 confirmed cases. In 2020, after expanding their role to testing and treating all ages KHIS enabled reporting clinical cases for <5 yrs and >=5 yrs.

KHIS also receives reports of uncomplicated malaria cases among pregnant women, which represents approximately 1% of uncomplicated malaria among persons >5 yrs. These data, however, were not available for the same period as the other uncomplicated cases, so we did not include them in our analyses.

| Table 3**.S** Dictionary of DHIS2 data elements accessed for confirmed cases   | dataElement | Categories | periodType | dataSet | zeroIsSignificant | data.id | | --- | --- | --- | --- | --- | --- | | CHEW No. positive | default | Monthly | MOH 748 - COMMUNITY HEALTH UNIT MONTHLY SUMMARY REPORT FOR MALARIA COMMODITIES | FALSE | CVHsV294PjK.NhSoXUMPK2K | | CHEW No. positive < 5 | default | Monthly | MOH 748 - COMMUNITY HEALTH UNIT MONTHLY SUMMARY REPORT FOR MALARIA COMMODITIES | FALSE | NeUMw0K561Q.NhSoXUMPK2K | | CHEW No. positive >= 5 | default | Monthly | MOH 748 - COMMUNITY HEALTH UNIT MONTHLY SUMMARY REPORT FOR MALARIA COMMODITIES | FALSE | TZHFXJrxbUU.NhSoXUMPK2K | | Confirmed Malaria (only Positive cases) | >5 yrs | Monthly | AWP Monthly Service Delivery;Family Health, PVLS, malaria & Consolidated Dashboards - USAID 2022;HIS-PMS DATA EXCHANGE;MOH 705 A Outpatient summary < 5 years Revised 2020;MOH 705 B Outpatient summary > 5 years Revised 2020 | TRUE | OoakJhWiyZp.SeDaCnHi3m5 | | Confirmed Malaria (only Positive cases) | <5 yrs | Monthly | AWP Monthly Service Delivery;Family Health, PVLS, malaria & Consolidated Dashboards - USAID 2022;HIS-PMS DATA EXCHANGE;MOH 705 A Outpatient summary < 5 years Revised 2020;MOH 705 B Outpatient summary > 5 years Revised 2020 | TRUE | OoakJhWiyZp.lHl2rmXpHse | |
| --- | --- | --- | --- | --- | --- | --- | --- | --- | --- | --- | --- | --- | --- | --- | --- | --- | --- | --- | --- | --- | --- | --- | --- | --- | --- | --- | --- | --- | --- | --- | --- | --- | --- | --- | --- | --- |

The column “data.id” column was created by concatenating the dataElement id and the categoryOptionCombo id with “.” separator.

| 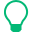 Tip |
| --- |
| **Common terms used with DHIS2 reporting**  **Data Element**: A data element represents the smallest unit of data that can be collected and analyzed in DHIS2. It could be a single piece of information such as the number of patients, the prevalence of a disease, or any other relevant health-related indicator. Each data element typically has a name, code, description, and data type associated with it.  **Categories**: Categories are used to define dissagregations like age group, and gender.  (WARNING: In some cases the categories are not just parts of a whole. For example, commodities frequently have disaggregations for ‘No. at start of month’, ‘No. at end of month’, ‘No. of days stocked out’. Note that in this case, the categories refer to different things (commodity units and days), and it does not make sense to add them together. Unfortunately, the default behavior when selecting a data element in the DHIS2 web-platform is to provide the total without the disaggregation. In this commodity example, the total makes no sense.)  **Dataset**: A dataset in DHIS2 is a collection of related data elements that are grouped together for data collection, analysis, and reporting purposes. Datasets are typically used to organize data collection forms or data entry screens.  **Indicator** is not necessarily a program indicator; it is any value derived from multiple data elements; examples include test-positivity rate, cases per 100,000 population, or total of inpatient and outpatient cases. |

## API Data Download

The data.id in [Table 3](#tbl-data-dictionary) were downloaded from KHIS (https://hiskenya.org, DHIS2 version 2.35.5) using the DHIS2 API[[4](#ref-IntroductionDHIS2Documentation)] to request data for all orgUnits each month from January 2015 through December 2022 (data accessed on 2023-08-06). Data were first downloaded with the option “SUM”; then with the option “COUNT”; and combined into one R dataset. For illustration, a small sample of the data (5 of 1,444,124 rows) is shown in [Table 4](#tbl-api).

| 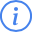 Note |
| --- |
| Aggregated DHIS2 data are available through KHIS with access provided by Kenya Ministry of Health. Requests to access these datasets should be directed to Ministry of Health KHIS <https://hiskenya.org/dhis-web-commons/security/login.action> and KMHFL, [kmhfl@health.go.ke](http://kmhfl@health.go.ke/). |

### Confirmed Cases

| Table 4**.S** Sample of data downloaded for confirmed cases   | dataElement | categoryOptionCombo | period | orgUnit | COUNT | SUM | | --- | --- | --- | --- | --- | --- | | OoakJhWiyZp | SeDaCnHi3m5 | 201301 | A2FJEDRHsgv | 1 | 1 | | OoakJhWiyZp | SeDaCnHi3m5 | 201303 | A2FJEDRHsgv | 1 | 30 | | OoakJhWiyZp | SeDaCnHi3m5 | 201306 | A2FJEDRHsgv | 1 | 3 | | OoakJhWiyZp | SeDaCnHi3m5 | 201307 | A2FJEDRHsgv | 1 | 1 | | OoakJhWiyZp | SeDaCnHi3m5 | 201309 | A2FJEDRHsgv | 1 | 11 | |
| --- | --- | --- | --- | --- | --- | --- | --- | --- | --- | --- | --- | --- | --- | --- | --- | --- | --- | --- | --- | --- | --- | --- | --- | --- | --- | --- | --- | --- | --- | --- | --- | --- | --- | --- | --- | --- |

The raw data file was download from KHIS on 2024-09-20 22:17:46.

The value of SUM is the total value (number of confirmed cases) from the orgUnit on that row, including the total value from any subordinate facilities. An orgUnit may represent a health provider (e.g. community health worker or health facility) as well as an administrative unit (e.g. sub-district, district, region, etc.). The value of COUNT represents the number of facilities reporting the variable (data.id). When COUNT >1, then the value includes totals from subordinate orgUnits, for example a sub-district with multiple health facilities reporting to it. The number of subordinate orgUnits that report the specified variable (data.id) each month frequently varies (see supplement on reporting bias). For orgUnits that do not have any subordinates, e.g. community health workers, the COUNT will always be 1.

Details of how to prepare the data for analyses are available in the supplement {ref}

### Vaccinations

The monthly number of persons vaccinated with RTS,S was reported by enrolled facilities and downloaded from KHIS.

We downloaded monthly malaria vaccine data by facility reported through DHIS2 from 2018 to 2022 on 2023-08-26.

## Organisational units (orgUnits)

level orgUnit == opd.id n
1 5 TRUE 1714
2 6 FALSE 1757

# Supplement D: Enrolled Health Care Facilities

## MVIP Areas

intervention.file = "Kenya_MVIP_clusters.xlsx"

interventions = readxl::read_excel( paste0( params$data.dir , intervention.file ) ) %>%
 mutate( Intervention = factor( `Vaccination status` , 0:2,
 labels = c('Comparison', 'Implementing', "non-MVIP" )) )

interventionCounties =
 interventions %>%
 distinct( Intervention , County, SubCounty ) %>%
 group_by( Intervention, County ) %>%
 summarise( `Sub Counties` = str_c( SubCounty, collapse = ", " ) ,
 .groups = "keep" )

interventionCounties %>% flextable() %>% FitFlextableToPage

| Table 5**.S** Health units associatied with each organization unit level   | Intervention | County | Sub Counties | | --- | --- | --- | | Comparison | Bungoma | Kanduyi, Sirisia | | Comparison | Busia | Bunyala, Matayos, Teso North, Teso South | | Comparison | Homa Bay | Karachuonyo, Rachuonyo South, Mbita, Rangwe, Suba South | | Comparison | Kakamega | Lurambi, Matungu, Mumias East, Shinyalu | | Comparison | Kisumu | Nyakach | | Comparison | Migori | Rongo, Suna East, Suna West, Uriri | | Comparison | Siaya | Ugunja | | Comparison | Vihiga | Hamisi, Sabatia | | Implementing | Bungoma | Bumula | | Implementing | Busia | Butula, Samia, Nambale | | Implementing | Homa Bay | Homa Bay Town, Kabondo Kasipul, Ndhiwa | | Implementing | Kakamega | Butere, Ikolomani, Khwisero, Malava, Mumias West, Navakholo | | Implementing | Kisumu | Kisumu Central, Kisumu East, Muhoroni | | Implementing | Migori | Awendo, Nyatike | | Implementing | Siaya | Rarieda, Ugenya | | Implementing | Vihiga | Emuhaya, Luanda, Vihiga | |
| --- | --- | --- | --- | --- | --- | --- | --- | --- | --- | --- | --- | --- | --- | --- | --- | --- | --- | --- | --- | --- | --- | --- | --- | --- | --- | --- | --- | --- | --- | --- | --- | --- | --- | --- | --- | --- | --- | --- | --- | --- | --- | --- | --- | --- | --- | --- | --- | --- | --- | --- | --- |

mvip.counties = mvip.boundaries %>% group_by( ADM1_EN ) %>% st_make_valid() %>% summarize(.groups = 'keep')

mvip.subcounties = mvip.boundaries %>% group_by( ADM1_EN, ADM2_EN ) %>% st_make_valid() %>% summarize(.groups = 'keep')

Kenya_base_map_data = map_data( "world", region = 'Kenya')
Uganda_base_map_data = map_data( "world", region = 'Uganda')
Tanzania_base_map_data = map_data( "world", region = 'Tanzania')
Sudan_base_map_data = map_data( "world", region = 'South Sudan')
Ethiopia_base_map_data = map_data( "world", region = 'Ethiopia')
Somalia_base_map_data = map_data( "world", region = 'Somalia')

df <- data.frame(x1 = 36.5, x2 = 35.5, y1 = 1.3, y2 = 0.1)

ggplot( ) +
 geom_polygon( data = Kenya_base_map_data ,
 aes(x = long, y = lat, group = group ) ,
 fill = 'white', color = 'black') +
 geom_polygon( data = Uganda_base_map_data ,
 aes(x = long, y = lat, group = group) ,
 fill = 'white', color = 'black') +
 geom_polygon( data = Tanzania_base_map_data ,
 aes(x = long, y = lat, group = group ) ,
 fill = 'white', color = 'black') +
 geom_polygon( data = Sudan_base_map_data ,
 aes(x = long, y = lat, group = group ) ,
 fill = 'white', color = 'black') +
 geom_polygon( data = Ethiopia_base_map_data ,
 aes(x = long, y = lat, group = group) ,
 fill = 'white', color = 'black') +
 geom_polygon( data = Somalia_base_map_data ,
 aes(x = long, y = lat, group = group) ,
 fill = 'white', color = 'black') +
 annotate( "text", label = "Kenya", x = 38, y = 0, size = 6, colour = "black" ) +
 annotate( "text", label = "Uganda", x = 33.5, y = 2, size = 3, colour = "black" ) +
 annotate( "text", label = "Tanzania", x = 36, y = -4,
 size = 3, colour = "black" ) +
 annotate( "text", label = "South\nSudan", x = 33.5, y = 5,
 size = 3, colour = "black" ) +
 annotate( "text", label = "Ethiopia", x = 38, y = 5,
 size = 3, colour = "black" ) +
 annotate( "text", label = "Somalia", x = 42, y = 2,
 size = 3, colour = "black" ) +
 annotate( "text", label = "MVIP\nCounties", x = 37, y = 2,
 size = 5, colour = "blue" ) +
 geom_curve(aes(x = x1, y = y1, xend = x2, yend = y2), data = df,
 arrow = arrow( length = unit(0.08, "inch") ) ,
 color = "gray20" , curvature = -0.3 ) +
 geom_sf( data = mvip.counties , inherit.aes = FALSE , aes( fill = ADM1_EN ) ) +
 geom_sf( data = lake_victoria_boundaries ,
 inherit.aes = FALSE, fill = 'lightblue' ) +
 annotate( "text" , label = "Lake\nVictoria", x = 33, y = -1 ,
 size = 2, colour = "black" ) +
 annotate( "text" , label = "Indian\nOcean", x = 42, y = -3 ,
 size = 2, colour = "black" ) +
 coord_sf( xlim = c(33, 43) , ylim = c(-5, 6) ) +
 theme_map() +
 theme( panel.background = element_rect(fill = 'lightgreen',
 color = 'lightgreen' ) ,
 legend.position= "right", legend.title = element_text( face = 'bold') ) +
 # guides( fill = 'none' ) +
 labs( fill = "County") +
 ggspatial::annotation_scale(location = "bl", width_hint = 0.4) +
 ggspatial::annotation_north_arrow(location = "tr", which_north = "true",
 pad_x = unit(0.0, "in"), pad_y = unit(0.2, "in"),
 style = north_arrow_fancy_orienteering)


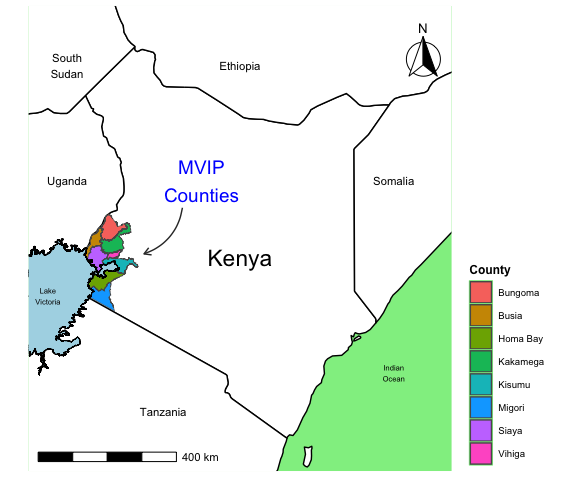


Map of MVIP sub-counties colored by intervention

ggsave( './output/intervention_counties_map.png' , dpi=300, width = 6, height = 8, units = 'in')

jw <- comparison::JaroWinkler()

mvip.boundaries.interventions = interventions %>%
 full_join( mvip.boundaries ,
 by = c( "County" = "ADM1_EN" , "SubCounty" = "ADM2_EN" )) %>%
 st_as_sf()

saveRDS( mvip.boundaries.interventions , paste0( params$output, 'mvip.boundaries.interventions.rds' ))

mvip.boundaries.interventions$Intervention[is.na(mvip.boundaries.interventions$Intervention)] = "non-MVIP"

# count( mvip.boundaries.interventions %>% as_tibble(), County, SubCounty, st_is_empty( geometry ) )

msc = mvip.boundaries.interventions %>%
 filter( !is.na( Intervention ) )

base_map =
 ggplot() +
 geom_sf( data = mvip.boundaries.interventions ,
 aes( fill = Intervention ) ) +
 geom_sf( data = lake_victoria_boundaries ,
 inherit.aes = FALSE, fill = 'grey' ) +
 coord_sf( xlim = c(33.8, 35.5) , ylim = c(-1.5, 1.1) ) +
 theme_map( ) +
 theme( legend.position= "right",
 legend.title = element_text( face = 'bold') ) +
 scale_fill_manual(
 labels = c("Comparison", "Implementing", "Non-MVIP"),
 values = c( "lightgreen", "lightblue", "gray95") )


base_map

ggsave( './output/base_map.png' , dpi=300, width = 6, height = 8, units = 'in')
saveRDS( base_map , paste0( params$output, 'base_map.rds' ))

base_map_subCounty = base_map +
 geom_spatial_text(
 data = bind_cols( msc,
 msc %>%
 st_make_valid() %>% st_centroid() %>%
 st_coordinates() ) ,
 aes( label = gsub(" ", "\n", SubCounty ) , x = X, y = Y ) ,
 crs = 4326 ,
 size = 1.5, color = 'black', face = 'bold' ,
 max.overlaps= 10 )

base_map_subCounty


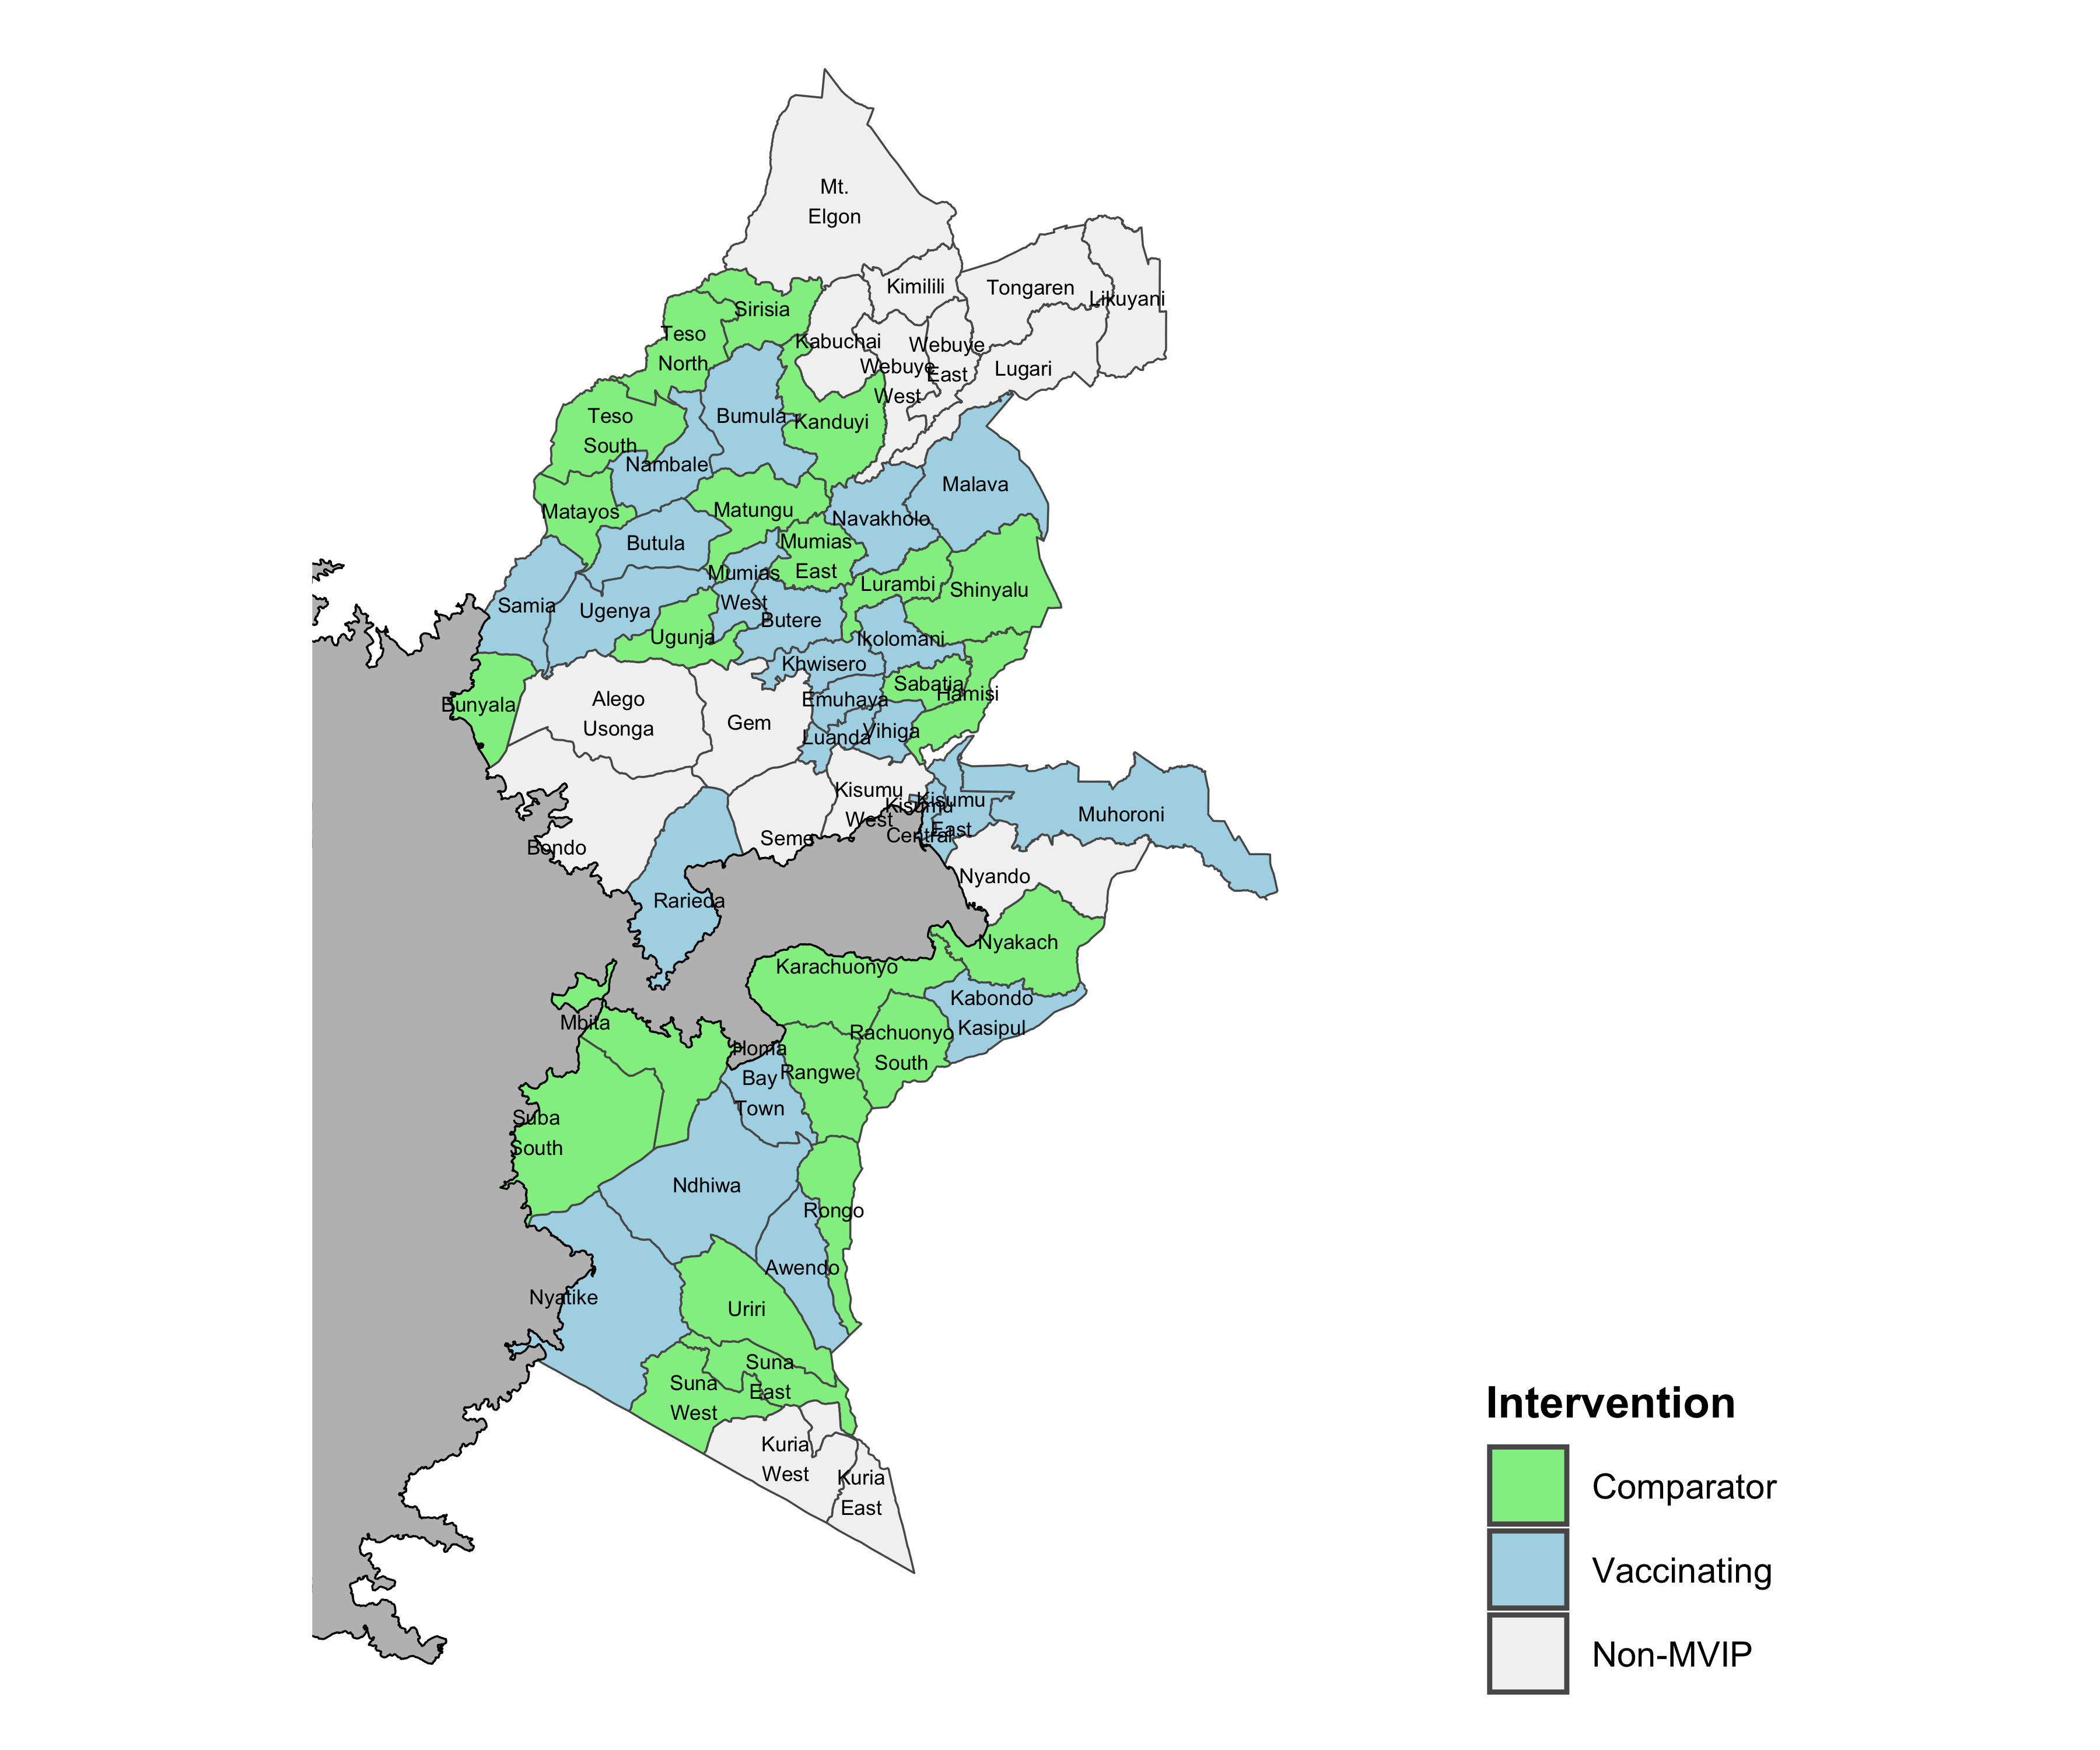


Map of MVIP sub-counties colored by intervention

ggsave( './output/base_map_labeled.png' , dpi=300, width = 6, height = 8, units = 'in')
saveRDS( base_map_subCounty , paste0( params$output, 'base_map_subCounty.rds' ))

## MVIP Health Facilities

We obtain information on orgUnits in KHIS and then filter them to the sub-counties enrolled in MVIP. In this file, the variable DHISID is the unique id, orgUnit, used to identify each facility in KHIS. After ensuring

### KHIS Facilities (not limited to MVIP area)

A list of organizational units, which includes health facilities was downloaded (Sep 9, 2023) from KHIS using the DHIS2 API[[4](#ref-IntroductionDHIS2Documentation)], for each organisational unit (orgUnit) level (1-6), e.g. for level 2 (see [Table 7](#tbl-orgUnitLevels) ):

API for all orgUnits in a level: https://hiskenya.org/api/organisationUnits.geojson?level=2&fields=:all&paging=false

ous = read_excel( paste0( params$data.dir ,"MetaData_2023-01-23.xlsx" ) , "OrgUnits" )

orgUnits.example.level2 = ous %>%
 filter( level == 2 ) %>%
 rename( orgUnit = id , parentOrgUnit = parent ) %>%
 select( name, orgUnit, level, levelName, parentOrgUnit , leaf ) %>%
 head(n=3)

orgUnits.example.level3 = ous %>%
 filter( level == 3 ) %>%
 rename( orgUnit = id , parentOrgUnit = parent ) %>%
 select( name, orgUnit, level, levelName, parentOrgUnit , leaf ) %>%
 head(n=3)

orgUnits.example.level4 = ous %>%
 filter( level == 4 ) %>%
 rename( orgUnit = id , parentOrgUnit = parent ) %>%
 select( name, orgUnit, level, levelName, parentOrgUnit , leaf ) %>%
 head(n=3)

orgUnits.example.level5 = ous %>%
 filter( level == 5 ) %>%
 rename( orgUnit = id , parentOrgUnit = parent ) %>%
 select( name, orgUnit, level, levelName, parentOrgUnit , leaf ) %>%
 head(n=3)

orgUnits.example.level6 = ous %>%
 filter( level == 6 ) %>%
 rename( orgUnit = id , parentOrgUnit = parent ) %>%
 select( name, orgUnit, level, levelName, parentOrgUnit , leaf ) %>%
 head(n=3)

bind_rows( orgUnits.example.level2,orgUnits.example.level3,
 orgUnits.example.level4,orgUnits.example.level5,
 orgUnits.example.level6 ) %>%
 flextable() %>% FitFlextableToPage

| Table 6**.S** Example of orgUnits available from a DHIS2 instance (showing 5 of 28,359 rows)   | name | orgUnit | level | levelName | parentOrgUnit | leaf | | --- | --- | --- | --- | --- | --- | | Baringo County | vvOK1BxTbet | 2 | County | Kenya | FALSE | | Bomet County | HMNARUV2CW4 | 2 | County | Kenya | FALSE | | Bungoma County | KGHhQ5GLd4k | 2 | County | Kenya | FALSE | | Baringo Central Sub County | k7Rj54u6dMx | 3 | Sub-County | Baringo County | FALSE | | Baringo North Sub County | bqtTmWcikTN | 3 | Sub-County | Baringo County | FALSE | | East Pokot Sub County | Mk4bMOSMRTB | 3 | Sub-County | Baringo County | FALSE | | Ainabkoi/Olare Ward | keTxMrb6Oag | 4 | County Assembly Ward | Ainabkoi Sub County | FALSE | | Kapsoya Ward | H9e1tEercdW | 4 | County Assembly Ward | Ainabkoi Sub County | FALSE | | Kaptagat Ward | cYwuj1W0Wux | 4 | County Assembly Ward | Ainabkoi Sub County | FALSE | | Abakaile Dispensary | QITW06phVzk | 5 | Health Facility | Abakaile Ward | FALSE | | Alikune Dispensary | edjfwbsoTLn | 5 | Health Facility | Abakaile Ward | FALSE | | Kumahumato Dispensary | J2nSU1CrG7s | 5 | Health Facility | Abakaile Ward | FALSE | | Ayucha Community Health Unit | lsAviUAjWGL | 6 | CommunityUnit | Ayucha Heallth Centre | TRUE | | Checkpoint Community Unit | TlYwJC9qpNb | 6 | CommunityUnit | Nakuru West( A.I.P.C.A) Medical Centre | TRUE | | Honeycup Community Health Unit | JsZeP9JbXsS | 6 | CommunityUnit | Nakuru West( A.I.P.C.A) Medical Centre | TRUE | |
| --- | --- | --- | --- | --- | --- | --- | --- | --- | --- | --- | --- | --- | --- | --- | --- | --- | --- | --- | --- | --- | --- | --- | --- | --- | --- | --- | --- | --- | --- | --- | --- | --- | --- | --- | --- | --- | --- | --- | --- | --- | --- | --- | --- | --- | --- | --- | --- | --- | --- | --- | --- | --- | --- | --- | --- | --- | --- | --- | --- | --- | --- | --- | --- | --- | --- | --- | --- | --- | --- | --- | --- | --- | --- | --- | --- | --- | --- | --- | --- | --- | --- | --- | --- | --- | --- | --- | --- | --- | --- | --- | --- | --- | --- | --- | --- | --- |

The orgUnit list in DHIS2 is organized as a parent-child listing: There is one line for each orgUnit that provides details of the orgUnit level, whether it is a ‘leaf’, and the orgUnit to which it belongs. For example, a community health unit (level 6) will show the parent orgUnit (level 5). All of the orgUnit are identified by their alphanumeric id. We then use code to turn that parent-child list of orgUnits into a table with the full names of each level. For example, each level 6 CommunityUnit will be a row in the table that includes the name of the County, SubCounty, County Assembly Ward, Health Facility, and CommunityUnit.

| 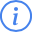 Organisational Hierarchy (DHIS2 Documentation[[5](#ref-OrganisationUnitsDHIS2)]) |
| --- |
| “The [orgUnit] hierarchy is built up of parent-child relations, e.g. a Country or MoH unit (the root) might have e.g. 8 parent units (provinces), and each province again ( at level 2) might have 10-15 districts as their children. Normally the health facilities will be located at the lowest level, but they can also be located at higher levels, e.g. national or provincial hospitals, so skewed organisational trees are supported (e.g. a leaf node can be positioned at level 2 while most other leaf nodes are at level 5).” |

Note: ‘leaf’ is a logical variable in DHIS2 that refers to the lowest level of a tree-like structure. When TRUE, there is no orgUnit below. When FALSE, there is at least one orgUnit below whose data will be aggregated into the totals for this orgUnit (see DHIS2 Documentation in the box below).

# dhis2 ous.tree ####
ous = read_excel( paste0( params$data.dir ,"MetaData_2023-01-23.xlsx" ) , "OrgUnits" )

ouLevels = read_excel( paste0( params$data.dir ,"MetaData_2023-01-23.xlsx" ) , "OrgUnitLevels" )

The KHIS organization units are organized by orgUnit levels:

ouLevels = ous %>%
 distinct( level, levelName ) %>%
 filter( !is.na( level )) %>%
 mutate( level = as.integer( level ))

ouLevels %>% flextable() %>% FitFlextableToPage

| Table 7**.S** Organisational Unit Levels in KHIS   | level | levelName | | --- | --- | | 1 | Kenya | | 2 | County | | 3 | Sub-County | | 4 | County Assembly Ward | | 5 | Health Facility | | 6 | CommunityUnit | |
| --- | --- | --- | --- | --- | --- | --- | --- | --- | --- | --- | --- | --- | --- | --- |

The orgUnit levels in DHIS2 are different from the Kenya Publilc Health service levels, which are organized by level of care[[6](#ref-ListHospitalsKenya2024)]:

kph = tribble(
 ~`KEPH Service Level`, ~Description ,
 "6" , "Tertiary referral hospital" ,
 "5", "Secondary referral hospital" ,
 "4", "Primary facilities" ,
 "3" , "Health centers",
 "2", "Dispensaries and clinics" ,
 "1" , "Commnity health units"

)

kph %>% flextable() %>% FitFlextableToPage

| KEPH Service Level | Description |
| --- | --- |
| 6 | Tertiary referral hospital |
| 5 | Secondary referral hospital |
| 4 | Primary facilities |
| 3 | Health centers |
| 2 | Dispensaries and clinics |
| 1 | Commnity health units |

# fix rows with missing level (levelName is present)
ous = ous %>% select( - level ) %>%
 inner_join( ouLevels , by = 'levelName' )

facilityLevels = ous %>%
 mutate( `Facility Key Word` = str_extract( name,
 regex( "\\bhospital|health|clinic|community\\b" , ignore_case = TRUE ) ) %>% str_to_title()
 ) %>%
 filter( ! is.na( `Facility Key Word` )) %>%
 count( level, levelName, `Facility Key Word` ) %>%
 rename( `No. of Units` = n )

facilityLevels %>% flextable() %>% FitFlextableToPage

| Table 8**.S** Number of health providers associatied with each KHIS organization unit level   | level | levelName | Facility Key Word | No. of Units | | --- | --- | --- | --- | | 4 | County Assembly Ward | Hospital | 3 | | 5 | Health Facility | Clinic | 3,392 | | 5 | Health Facility | Community | 254 | | 5 | Health Facility | Health | 2,078 | | 5 | Health Facility | Hospital | 1,038 | | 6 | CommunityUnit | Clinic | 7 | | 6 | CommunityUnit | Community | 9,447 | | 6 | CommunityUnit | Health | 247 | | 6 | CommunityUnit | Hospital | 11 | |
| --- | --- | --- | --- | --- | --- | --- | --- | --- | --- | --- | --- | --- | --- | --- | --- | --- | --- | --- | --- | --- | --- | --- | --- | --- | --- | --- | --- | --- | --- | --- | --- | --- | --- | --- | --- | --- | --- | --- | --- | --- |

### MVIP-KHIS Health Facilities

Select all facilities within the MVIP intervention sub-counties.

# open file created in previous chunk
if (!exists( 'ous.tree') ) ous.tree = readRDS( paste0( params$data.dir , "ous.tree.rds" ) )

# match names with dhis2 ous.tree ####

# match by district and fuzzy facility name

jw <- comparison::JaroWinkler()

MVIP.KHIS = interventions %>%
 filter( !is.na( SubCounty ) , !is.na( Intervention)) %>%
 fuzzy_left_join(
 ous.tree ,
 match_fun = function(x, y){ jw(x, y) > 0.95 } ,
 by = c( 'County' , 'SubCounty' ) ) %>%
 rename( County = County.x , SubCounty = SubCounty.x ,
 Ward = `County Assembly Ward` ) %>%
 select( County, SubCounty, Ward, `Health Facility`, CommunityUnit ,
 Intervention, Vector_2021, IRS, orgUnit, orgUnitName , level, leaf, parent.orgUnit
 )

unmatched = MVIP.KHIS %>%
 filter( is.na( orgUnit ))

- Verify that all of the MVIP sub-county interventions were linked with DHIS2 orgUnits: TRUE

### Western Kenya Health Facility List

An additional facility list for the MVIP area was obtained with contained additional information about the facilities, including the ownership (public vs. private), KEPH service level, and updated coordinates.[[7](#Xe6bd6656e71ed4a3b7e8590e68f6583490d1c04)]

# Assign intervention to master list.
WKHF = read_excel( paste0( params$data.dir ,"HF Western Kenya - master list.xlsx" ) ,
 guess_max = min(2000) ) %>%
 select( County_DHIS2, Sub_County_DHIS2, Facility_Name, KEPH_Level ,
 DHISID, Owner,
 Long_Final, Lat_Final, Source_LL_FINAL ) %>%
 left_join( interventions ,
 by = c( "County_DHIS2" = "County",
 "Sub_County_DHIS2" = "SubCounty" )
 ) %>%
 mutate( Intervention = ifelse( is.na( Intervention) ,
 'Non-MVIP (implementing)' ,
 as.character( Intervention ) ) )

#### Update DHISID

- Check for duplicate facility names: ther one duplicate facility, “Obwogre Dispensary”, one of which one has a DHISID and the other does not; we keep the one with the DHISID.

count( WKHF, Sub_County_DHIS2 , Facility_Name ) %>% arrange(-n) %>% filter(n>1)

# A tibble: 1 × 3
 Sub_County_DHIS2 Facility_Name n
 <chr> <chr> <int>
1 Ugenya Obwogre Dispensary 2

WKHF = WKHF %>% filter( ! ( Facility_Name %in% "Obwogre Dispensary" & DHISID == "None" ) )

- Check for spatial coordinates:

WKHF %>%
 count( hasLongitude = ! is.na( Long_Final), hasLatitude = ! is.na(Lat_Final ))

# A tibble: 2 × 3
 hasLongitude hasLatitude n
 <lgl> <lgl> <int>
1 FALSE FALSE 9
2 TRUE TRUE 1692

- Check for unique DHISID, which should match the KHIS orgUnit, and will be used to link these facilities with KHIS:

duplicateDHISid = count( WKHF, DHISID ) %>% filter( n>1 ) %>% arrange(-n)

duplicateDHISid

# A tibble: 1 × 2
 DHISID n
 <chr> <int>
1 None 109

noDHISID = WKHF$DHISID %in% 'None'

There are no duplicates, but some DHISID are missing; DHISID is ‘None’ for 109.

- For those with no DHISID, try to match the Facility_Name with the orgUnit name in KHIS.

The DHISID was added for 6 of 109 rows.

### Hybrid MVIP-KHIS-Western Kenya Health Facility List

- Update KHIS orgUnits with the Western Kenya facilities list us. Note that the master list does that include any of the community health units that are associated with health facilities. Because this analysis will include the cases reported by community health units,

#|echo: true

MVIP.KHIS.WKHF = MVIP.KHIS %>%
 # join with masterlist
 left_join( updatedWKHF %>%
 select( DHISID, Facility_Name, Long_Final ,Lat_Final,
 Owner, KEPH_Level ),
 by = c( "orgUnit"= "DHISID") )

saveRDS( MVIP.KHIS.WKHF, paste0( params$data.dir , "MVIP.KHIS.WKHF.rds" ) )

- 1,493 rows in MVIP.KHIS were linked with the WKHF table.

#### Facility types in MVIP areas

#|echo: true


mvipFacilityLevels = MVIP.KHIS.WKHF %>%
 mutate( `Facility Key Word` = str_extract( orgUnitName,
 regex( "\\bhospital|health|community|dispens\\b" ,
 ignore_case = TRUE ) ) %>%
 str_to_title()
 ) %>%
 left_join( ouLevels , by = 'level' ) %>%
 # mutate( levelName = ifelse( paste0( levelName, "-", Owner ) ) %>%
 count( level, levelName, Intervention ) %>%
 pivot_wider( names_from = "Intervention", values_from = n ) %>%
 mutate( across(everything(), ~ ifelse(is.na(.), "-", . )) ,
 ) %>%
 rename( `KHIS Level` = levelName )

# Save
saveRDS(mvipFacilityLevels, "output/mvipFacilityLevels.rds")


total_facilities <- mvipFacilityLevels %>%
 filter( `KHIS Level` == 'Health Facility' ) %>%
 summarise( across( where(is.numeric) , \(x) sum( x, na.rm = TRUE) ) ) %>%
 mutate( levelName = 'Health Facility' )


tbl.mvipFacilitiesByLevel = mvipFacilityLevels %>%
 select( - level ) %>%
 flextable() %>% FitFlextableToPage
 # kable( align = c("l", "r", "r") )
 # add_header_above( c( rep("", 1) , "No. of Units" = 2) )

tbl.mvipFacilitiesByLevel

| Table 9**.S** Type of health units in MVIP districts associatied with each organization unit level   | KHIS Level | Comparison | Implementing | | --- | --- | --- | | Sub-County | 23 | 23 | | County Assembly Ward | 115 | 113 | | Health Facility | 874 | 840 | | CommunityUnit | 838 | 931 | |
| --- | --- | --- | --- | --- | --- | --- | --- | --- | --- | --- | --- | --- | --- | --- | --- |

#|echo: true


mvipFacilityOwners = MVIP.KHIS.WKHF %>%
 filter( level == 5 ) %>%
 left_join( ouLevels , by = 'level' ) %>%
 # mutate( levelName = ifelse( paste0( levelName, "-", Owner ) ) %>%
 count( level, levelName, Owner , Intervention ) %>%
 # mutate( percent = paste0( "(" , (n / sum(n) ) %>% percent , ")" ) ) %>%
 pivot_wider( names_from = "Intervention", values_from = n) %>%
 mutate( across(everything(), ~ ifelse(is.na(.), "Unidentified", . )) ,
 ) %>%
 rename( `KHIS Level` = levelName )

# Save
saveRDS(mvipFacilityOwners, "output/mvipFacilityOwners.rds")


tbl.mvipFacilityOwners = mvipFacilityOwners %>%
 select( - level ) %>%
 flextable() %>% FitFlextableToPage
 # kable( align = c("l", "l", "r", "r") )
 # add_header_above( c( rep("", 2) , "No. of Units" = 2) )

tbl.mvipFacilityOwners

| Table 10**.S** Type of health units in MVIP districts associatied with each organization unit level   | KHIS Level | Owner | Comparison | Implementing | | --- | --- | --- | --- | | Health Facility | Ministry of Health | 392 | 399 | | Health Facility | Mission/Faith-Based Organization | 80 | 65 | | Health Facility | Non-Governmental Organization | 16 | 29 | | Health Facility | Other Min | 14 | 9 | | Health Facility | Private | 255 | 234 | | Health Facility | Unidentified | 117 | 104 | |
| --- | --- | --- | --- | --- | --- | --- | --- | --- | --- | --- | --- | --- | --- | --- | --- | --- | --- | --- | --- | --- | --- | --- | --- | --- | --- | --- | --- | --- |

#### Percentage of facility ownership by intervention

For facilities in KHIS that were linked with the master list, we compared the facility ownership across interventions [Table 11](#tbl-mvipFacilitiesByOwner) . (The column with owner, the row with missing value for owner indicates facilities in the master list that were not linked with those in KHIS)

comp = MVIP.KHIS.WKHF %>%
 filter(is.na(CommunityUnit), Intervention == "Comparison" ) %>%
 count( Intervention, Owner ) %>%
 mutate( Owner = ifelse( is.na(Owner), 'Unknonwn' , Owner ) ) %>%
 group_by( Intervention ) %>%
 tidyfst:: add_prop()

vacc = MVIP.KHIS.WKHF %>%
 filter(is.na(CommunityUnit), Intervention == "Implementing") %>%
 count( Intervention, Owner ) %>%
 mutate( Owner = ifelse( is.na(Owner), 'Unknonwn' , Owner ) ) %>%
 group_by( Intervention ) %>%
 tidyfst:: add_prop()


mvipFacilitiesByOwner =
 bind_rows( comp, vacc ) %>%
 mutate( Owner = str_replace_all( Owner, "Other Min" , "Other MOH" ) ) %>%
 select( Intervention, Owner, prop_label ) %>%
 pivot_wider( names_from = "Intervention", values_from = prop_label )

mvipFacilitiesByOwner %>%
 flextable() %>% FitFlextableToPage
saveRDS( mvipFacilitiesByOwner, paste0( params$output , 'mvipFacilitiesByOwner.rds' ))

| Table 11**.S** Ownership of health units for the MVIP intervention areas   | Owner | Comparison | Implementing | | --- | --- | --- | | Ministry of Health | 38.7% | 40.9% | | Mission/Faith-Based Organization | 7.9% | 6.7% | | Non-Governmental Organization | 1.6% | 3.0% | | Other MOH | 1.4% | 0.9% | | Private | 25.2% | 24.0% | | Unknonwn | 25.2% | 24.6% | |
| --- | --- | --- | --- | --- | --- | --- | --- | --- | --- | --- | --- | --- | --- | --- | --- | --- | --- | --- | --- | --- | --- |

#### Vector Control Strategy Among Intervention Areas

***TODO: add dates of interventions

Sub-counties in Western Kenya participated in several vector control strategies. IRS was applied annually in 14 sub-counties. Meanwhile, mass bednet campaigns were carried out in 32 sub-counties during 2021. Of these, 12 sub-counties received long-lasting insecticide nets treated with pyrethroids (Standard net) and 20 received long-lasting insecticide nets treated with combined pyrethroid and piperonyl-butoxide (PBO).[[8](#X5f97a996f609132a5e80ab25cb1f82c3045b61e)] A greater proportion of sub-district assigned to the comparison groups received the more effective vector control interventions, IRS and PBO nets [Table 12](#tbl-mvipFacilitiesByVC).

#|echo: true
#|
total.facilities =
 MVIP.KHIS.WKHF %>%
 # inner_join( interventions %>% count( County, SubCounty, Vector_2021 ) ,
 # by = c( 'County' , 'SubCounty' ) ) %>%
 rename( `Vector Control (2021)` = Vector_2021 ) %>%
 # filter( level %in% 3:6 ) %>%
 group_by( Intervention , `Vector Control (2021)` ) %>%
 summarise( N.Counties = n_distinct( County ),
 N.SubCounties = n_distinct( SubCounty ) ,
 N.Facilities = n_distinct( `Health Facility` )
 # , N.CHU= n_distinct( CommunityUnit )
 ) %>%
 ungroup %>%
 group_by( Intervention ) %>%
 mutate(prop = N.Facilities / sum(N.Facilities) * 100) %>%
 # tidyfst:: add_prop( 'N.Facilities' ) %>%
 # select( - prop_label ) %>%
 # rename( Percent = prop_label ) %>%
ungroup %>%
 bind_rows(
 summarise(., across(where(is.numeric), sum) ,
 across(where(is.character), ~ 'Total' ) )
 ) %>%
 mutate(
 Percent = percent( prop / 100 )
 ) %>%
 select( - prop )

subtotals <- total.facilities %>%
 group_by( Intervention ) %>%
 summarise(., across(where(is.numeric), sum) ,
 across(where(is.character), ~ 'Total' ) ) %>%
 mutate( Intervention = paste( Intervention, "Subtotal")) %>%
 ungroup()

total.facilities %>%
 flextable() %>% FitFlextableToPage
 # kable( align = c("l","l", "r", "r" , "r", "r" ) )

| Table 12**.S** Vector control interventions assigned to sub-counties in each MVIP intervention area   | Intervention | Vector Control (2021) | N.Counties | N.SubCounties | N.Facilities | Percent | | --- | --- | --- | --- | --- | --- | | Comparison | IRS | 2 | 9 | 383 | 44.0% | | Comparison | PBO | 3 | 10 | 344 | 39.5% | | Comparison | Pyrethroid | 3 | 4 | 144 | 16.5% | | Implementing | IRS | 2 | 5 | 244 | 29.2% | | Implementing | PBO | 3 | 10 | 270 | 32.3% | | Implementing | Pyrethroid | 3 | 8 | 322 | 38.5% | |  | Total | 16 | 46 | 1,707 | 200.0% | |
| --- | --- | --- | --- | --- | --- | --- | --- | --- | --- | --- | --- | --- | --- | --- | --- | --- | --- | --- | --- | --- | --- | --- | --- | --- | --- | --- | --- | --- | --- | --- | --- | --- | --- | --- | --- | --- | --- | --- | --- | --- | --- | --- | --- | --- | --- | --- | --- | --- |

### Map of Health Providers in MVIP Areas

When available, we used the coordinates provided in the Western Kenya file. When not available, we used the coordinates provided by KHIS.

**TODO: verify KHIS coordinates belong to corresponding admin unit.

#|echo: true


khis.sf = readRDS( paste0( params$data.dir , params$geo.file ) ) %>%
 rename( orgUnit = id )

# use coordinates to make simple features spatial dataset (https://r-spatial.github.io/sf/)
geo_coord_system = st_crs( khis.sf )

# Some polygons have invalid geometry. see https://github.com/r-spatial/sf/issues/1902 for similar issue
# In the SF package, the solution is to turn off spherical geometry and rebuild the geometry with st_make_valid() as planar geometry. See: https://r-spatial.org/r/2020/06/17/s2.html and #1771.
sf_use_s2(FALSE)

Spherical geometry (s2) switched off

# convert WKHF make simple features spatial dataset
# WKHF.sf = WKHF %>%
# filter( ! is.na( Long_Final ) ) %>%
# st_as_sf( coords = c( "Long_Final" , "Lat_Final") ) %>%
# mutate( masterList.geometry.type = st_geometry_type( geometry ) )


# Make spatial dataset of MVIP.KHIS
MVIP.KHIS.WKHF.sf = MVIP.KHIS.WKHF %>%
 left_join( khis.sf %>% select( orgUnit, geometry, parentName ) ,
 by = 'orgUnit' ) %>%
 st_as_sf() %>%
 st_make_valid()

# Update coordinates:
# if present, use WKHF coordinates to update facilities
# - 9 facilities in WKHF missing coordinates
WKHFCoordinates = !is.na( MVIP.KHIS.WKHF$Lat_Final )
orgUnitsWithWKHFcoordinates = MVIP.KHIS.WKHF[ WKHFCoordinates ,]$orgUnit

# Rebuild spatial dataset using coordinates from WKHF first, then adding KHIS sf geometry
MVIP.KHIS.WKHF.sf2 =
 bind_rows(

 MVIP.KHIS.WKHF.sf[ WKHFCoordinates, ] %>%
 st_as_sf( coords = c("Long_Final", "Lat_Final") ) %>%
 st_make_valid() ,

 MVIP.KHIS.WKHF.sf[ ! WKHFCoordinates, !names(MVIP.KHIS.WKHF.sf) %in% c("Long_Final", "Lat_Final") ]
 )

# After update, some facilities (mostly level 6 CHW) do not have coordinates
MVIP.KHIS.WKHF.sf2$noGeo = st_is_empty( MVIP.KHIS.WKHF.sf )

saveRDS( MVIP.KHIS.WKHF.sf2, paste0( params$data.dir , "MVIP.KHIS.WKHF.sf2.rds" ) )


# Fill in level for facilities from masterList -- all are presumed level= 5
levelNA = is.na( MVIP.KHIS.WKHF.sf2$level )

# Set facilities as those orgUnits in level 5 and 6
mvip.facilities = MVIP.KHIS.WKHF.sf2 %>%
 # filter( level > 4 ) %>%
 mutate( level = as.factor( level ) )

saveRDS( mvip.facilities , paste0( params$data.dir, 'mvip.facilities.rds' ) )

# Count facilities by orgUnit level
mvip.facilities %>% st_drop_geometry() %>%
 count( level, KEPH_Level , noGeo ) %>%
 flextable() %>% FitFlextableToPage

| level | KEPH_Level | noGeo | n |
| --- | --- | --- | --- |
| 3 |  | FALSE | 20 |
| 3 |  | TRUE | 26 |
| 4 |  | FALSE | 95 |
| 4 |  | TRUE | 133 |
| 5 | Level 2 | FALSE | 535 |
| 5 | Level 2 | TRUE | 605 |
| 5 | Level 3 | FALSE | 140 |
| 5 | Level 3 | TRUE | 142 |
| 5 | Level 4 | FALSE | 36 |
| 5 | Level 4 | TRUE | 33 |
| 5 | Level 5 | TRUE | 2 |
| 5 |  | FALSE | 91 |
| 5 |  | TRUE | 130 |
| 6 |  | FALSE | 732 |
| 6 |  | TRUE | 1,037 |

#|echo: true
#|

# note that some coordinates are outside MVIP, probably because of data entry error
boundaryBox = mvip.boundaries.interventions %>% st_bbox()


ggplot() +
 geom_sf( data = mvip.boundaries.interventions, aes( fill = Intervention) ) +
 geom_sf( data = mvip.facilities ,
 aes( color = level ), size = 1 ) +

 coord_sf(
 xlim = c( boundaryBox[1], boundaryBox[3]),
 ylim = c(boundaryBox[2], boundaryBox[4] ),
 expand = FALSE
 ) +
 theme_map( ) +
 theme( legend.position= "right",
 legend.title = element_text( face = 'bold') ) +
 scale_fill_manual(
 labels = c("Comparison", "Implementing", "Non-MVIP"),
 values = c( "lightgreen", "lightblue", "gray95") )


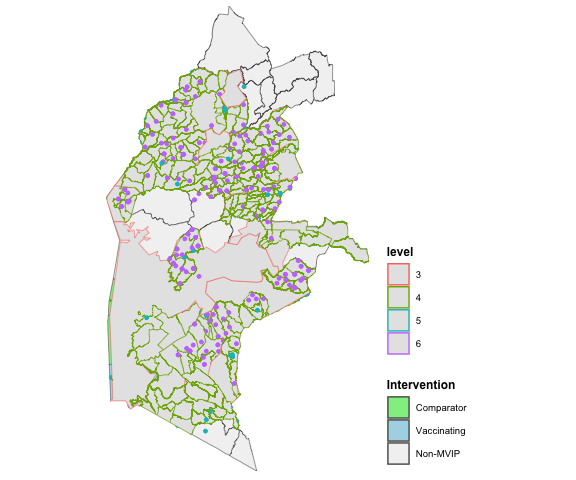


# scale_color_manual(
 # labels = c("4" , "5", "6" ),
 # values = c( "black", "dark grey" , "gray95") )

### Online map

An interactive map, prepared using the R leaflet package,[[9](#ref-leaflet)] is available online (url to be named later). A measurement tool (kms) is provided in the lower left corner to estimate the distance between facilities.

# Supplement E: Vaccine Doses

### Vaccinations reported by enrolled facilities

We downloaded monthly malaria vaccine data by facility reported through DHIS2 from 2018 to 2022 on 2023-08-26.

| Table 13**.S** Number of monthly malaria vaccine reports by dose   | data.id | data | vx_reports | | --- | --- | --- | | Rhkz9D6hdZV_NhSoXUMPK2K | NVIP Malaria Vaccine Dose 2_default | 27020 | | U46JIUFqgvj_NhSoXUMPK2K | NVIP Malaria Vaccine Dose 1_default | 27906 | | pznTlBTeIb7_NhSoXUMPK2K | NVIP Malaria Vaccine Dose 4_default | 17266 | | znLJPgpYjpF_NhSoXUMPK2K | NVIP Malaria Vaccine Dose 3_default | 25656 | |
| --- | --- | --- | --- | --- | --- | --- | --- | --- | --- | --- | --- | --- | --- | --- | --- |

Number of subcounties providing RTS,S reports

| Intervention | vx_reports |
| --- | --- |
| Comparison | 23 |
| Implementing | 23 |
| non-MVIP | 16 |

Several additional sub-counties provided vaccination during the MVIP

non-MVIP vaccination sub-counties

| County | Sub-County |
| --- | --- |
| Kakamega County | Mumias West Sub County |
| Kisumu County | Kisumu Central Sub County |
| Kisumu County | Kisumu East Sub County |
| Kisumu County | Kisumu West Sub County |
| Kisumu County | Seme Sub County |
| Siaya County | Gem Sub County |

Complete list of MVIP and non-MVIP subcounties

| Intervention | County | Sub-County | vx_reports |
| --- | --- | --- | --- |
| Comparison | Bungoma County | Kanduyi Sub County | 399 |
| Comparison | Bungoma County | Sirisia Sub County | 224 |
| Comparison | Busia County | Bunyala Sub County | 134 |
| Comparison | Busia County | Matayos Sub County | 256 |
| Comparison | Busia County | Teso North Sub County | 130 |
| Comparison | Busia County | Teso South Sub County | 260 |
| Comparison | Homa Bay County | Karachuonyo Sub County | 657 |
| Comparison | Homa Bay County | Mbita Sub County | 369 |
| Comparison | Homa Bay County | Rachuonyo South Sub County | 335 |
| Comparison | Homa Bay County | Rangwe Sub County | 335 |
| Comparison | Homa Bay County | Suba South Sub County | 331 |
| Comparison | Kakamega County | Lurambi Sub County | 319 |
| Comparison | Kakamega County | Matungu Sub County | 249 |
| Comparison | Kakamega County | Mumias East Sub County | 210 |
| Comparison | Kakamega County | Shinyalu Sub County | 317 |
| Comparison | Kisumu County | Nyakach Sub County | 373 |
| Comparison | Migori County | Rongo Sub County | 220 |
| Comparison | Migori County | Suna East Sub County | 191 |
| Comparison | Migori County | Suna West Sub County | 283 |
| Comparison | Migori County | Uriri Sub County | 315 |
| Comparison | Siaya County | Ugunja Sub County | 212 |
| Comparison | Vihiga County | Hamisi Sub County | 459 |
| Comparison | Vihiga County | Sabatia Sub County | 181 |
| Implementing | Bungoma County | Bumula Sub County | 2790 |
| Implementing | Busia County | Butula Sub County | 2842 |
| Implementing | Busia County | Nambale Sub County | 2130 |
| Implementing | Busia County | Samia Sub County | 2362 |
| Implementing | Homa Bay County | Homa Bay Town Sub County | 3091 |
| Implementing | Homa Bay County | Kabondo Kasipul Sub County | 3748 |
| Implementing | Homa Bay County | Ndhiwa Sub County | 5909 |
| Implementing | Kakamega County | Butere Sub County | 2770 |
| Implementing | Kakamega County | Ikolomani Sub County | 2740 |
| Implementing | Kakamega County | Khwisero Sub County | 2902 |
| Implementing | Kakamega County | Malava Sub County | 4395 |
| Implementing | Kakamega County | Mumias West Sub County | 2127 |
| Implementing | Kakamega County | Navakholo Sub County | 2408 |
| Implementing | Kisumu County | Kisumu Central Sub County | 4438 |
| Implementing | Kisumu County | Kisumu East Sub County | 3700 |
| Implementing | Kisumu County | Muhoroni Sub County | 4363 |
| Implementing | Migori County | Awendo Sub County | 3252 |
| Implementing | Migori County | Nyatike Sub County | 6773 |
| Implementing | Siaya County | Rarieda Sub County | 4306 |
| Implementing | Siaya County | Ugenya Sub County | 2917 |
| Implementing | Vihiga County | Emuhaya Sub County | 1760 |
| Implementing | Vihiga County | Luanda Sub County | 2810 |
| Implementing | Vihiga County | Vihiga Sub County | 2368 |
| non-MVIP | Busia County | Bunyala Sub County | 23 |
| non-MVIP | Busia County | Matayos Sub County | 16 |
| non-MVIP | Busia County | Teso North Sub County | 11 |
| non-MVIP | Busia County | Teso South Sub County | 2 |
| non-MVIP | Homa Bay County | Mbita Sub County | 2 |
| non-MVIP | Kakamega County | Lurambi Sub County | 20 |
| non-MVIP | Kakamega County | Mumias West Sub County | 126 |
| non-MVIP | Kisumu County | Kisumu Central Sub County | 167 |
| non-MVIP | Kisumu County | Kisumu East Sub County | 316 |
| non-MVIP | Kisumu County | Kisumu West Sub County | 3847 |
| non-MVIP | Kisumu County | Nyando Sub County | 340 |
| non-MVIP | Kisumu County | Seme Sub County | 3587 |
| non-MVIP | Migori County | Suna East Sub County | 3 |
| non-MVIP | Siaya County | Bondo Sub County | 375 |
| non-MVIP | Siaya County | Gem Sub County | 5321 |
| non-MVIP | Vihiga County | Sabatia Sub County | 32 |


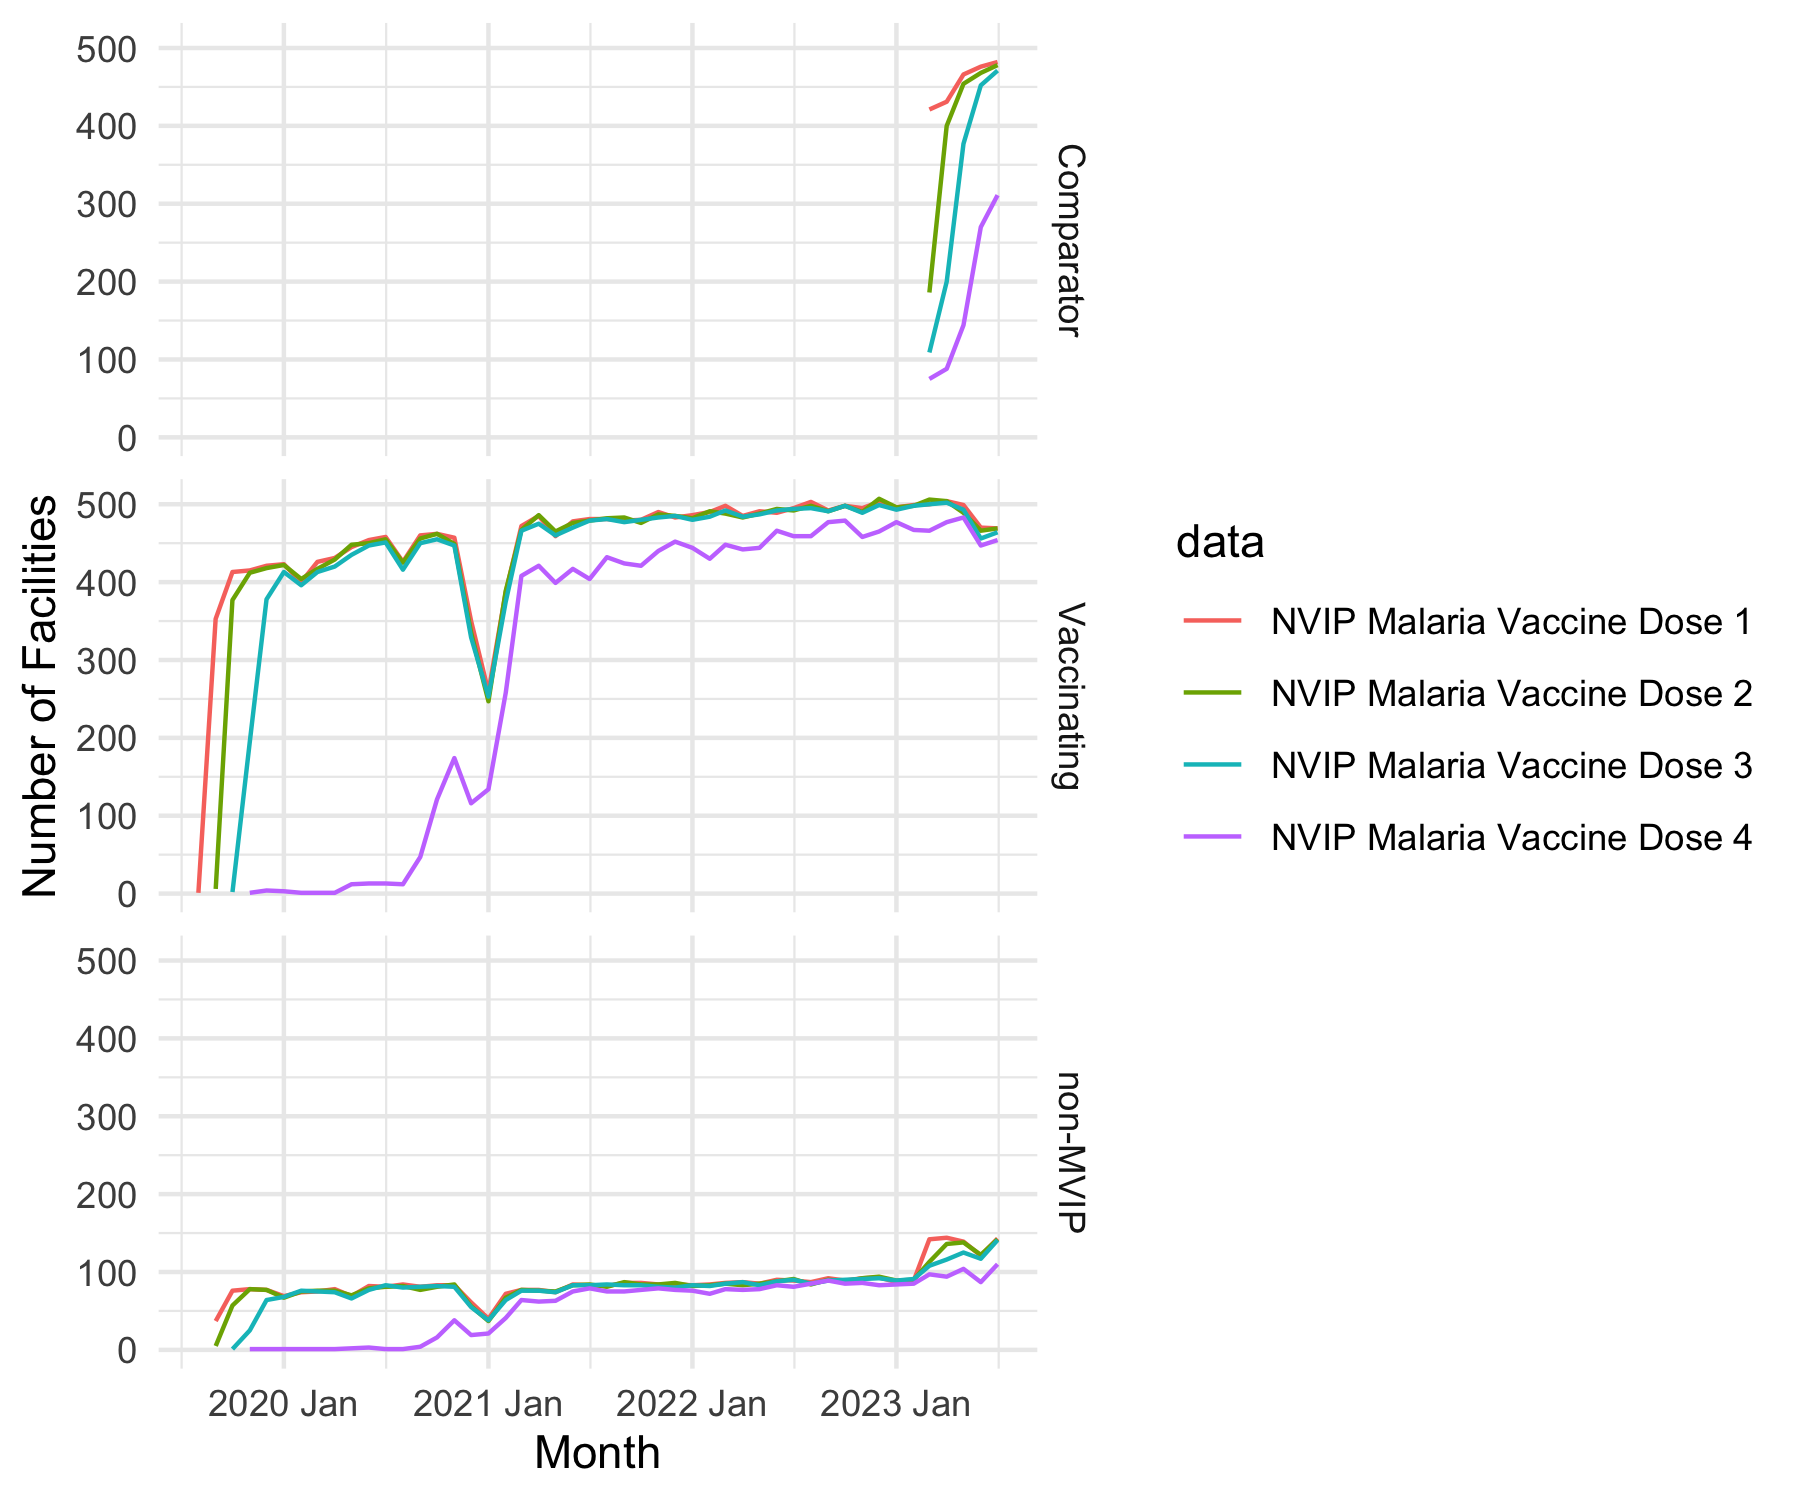


Number of facilities reporting RTS,S administration by intervention area

- Before 2023, only facilities in the Implementing areas reported administering RTS,S vx 1-4. Facilities in the Comparison areas began implementing in 2023.
- Approximately 75 facilities in sub-districts adjacent to the MVIP reporting administering RTS,S vx 1-4 during 2020-2022.

| 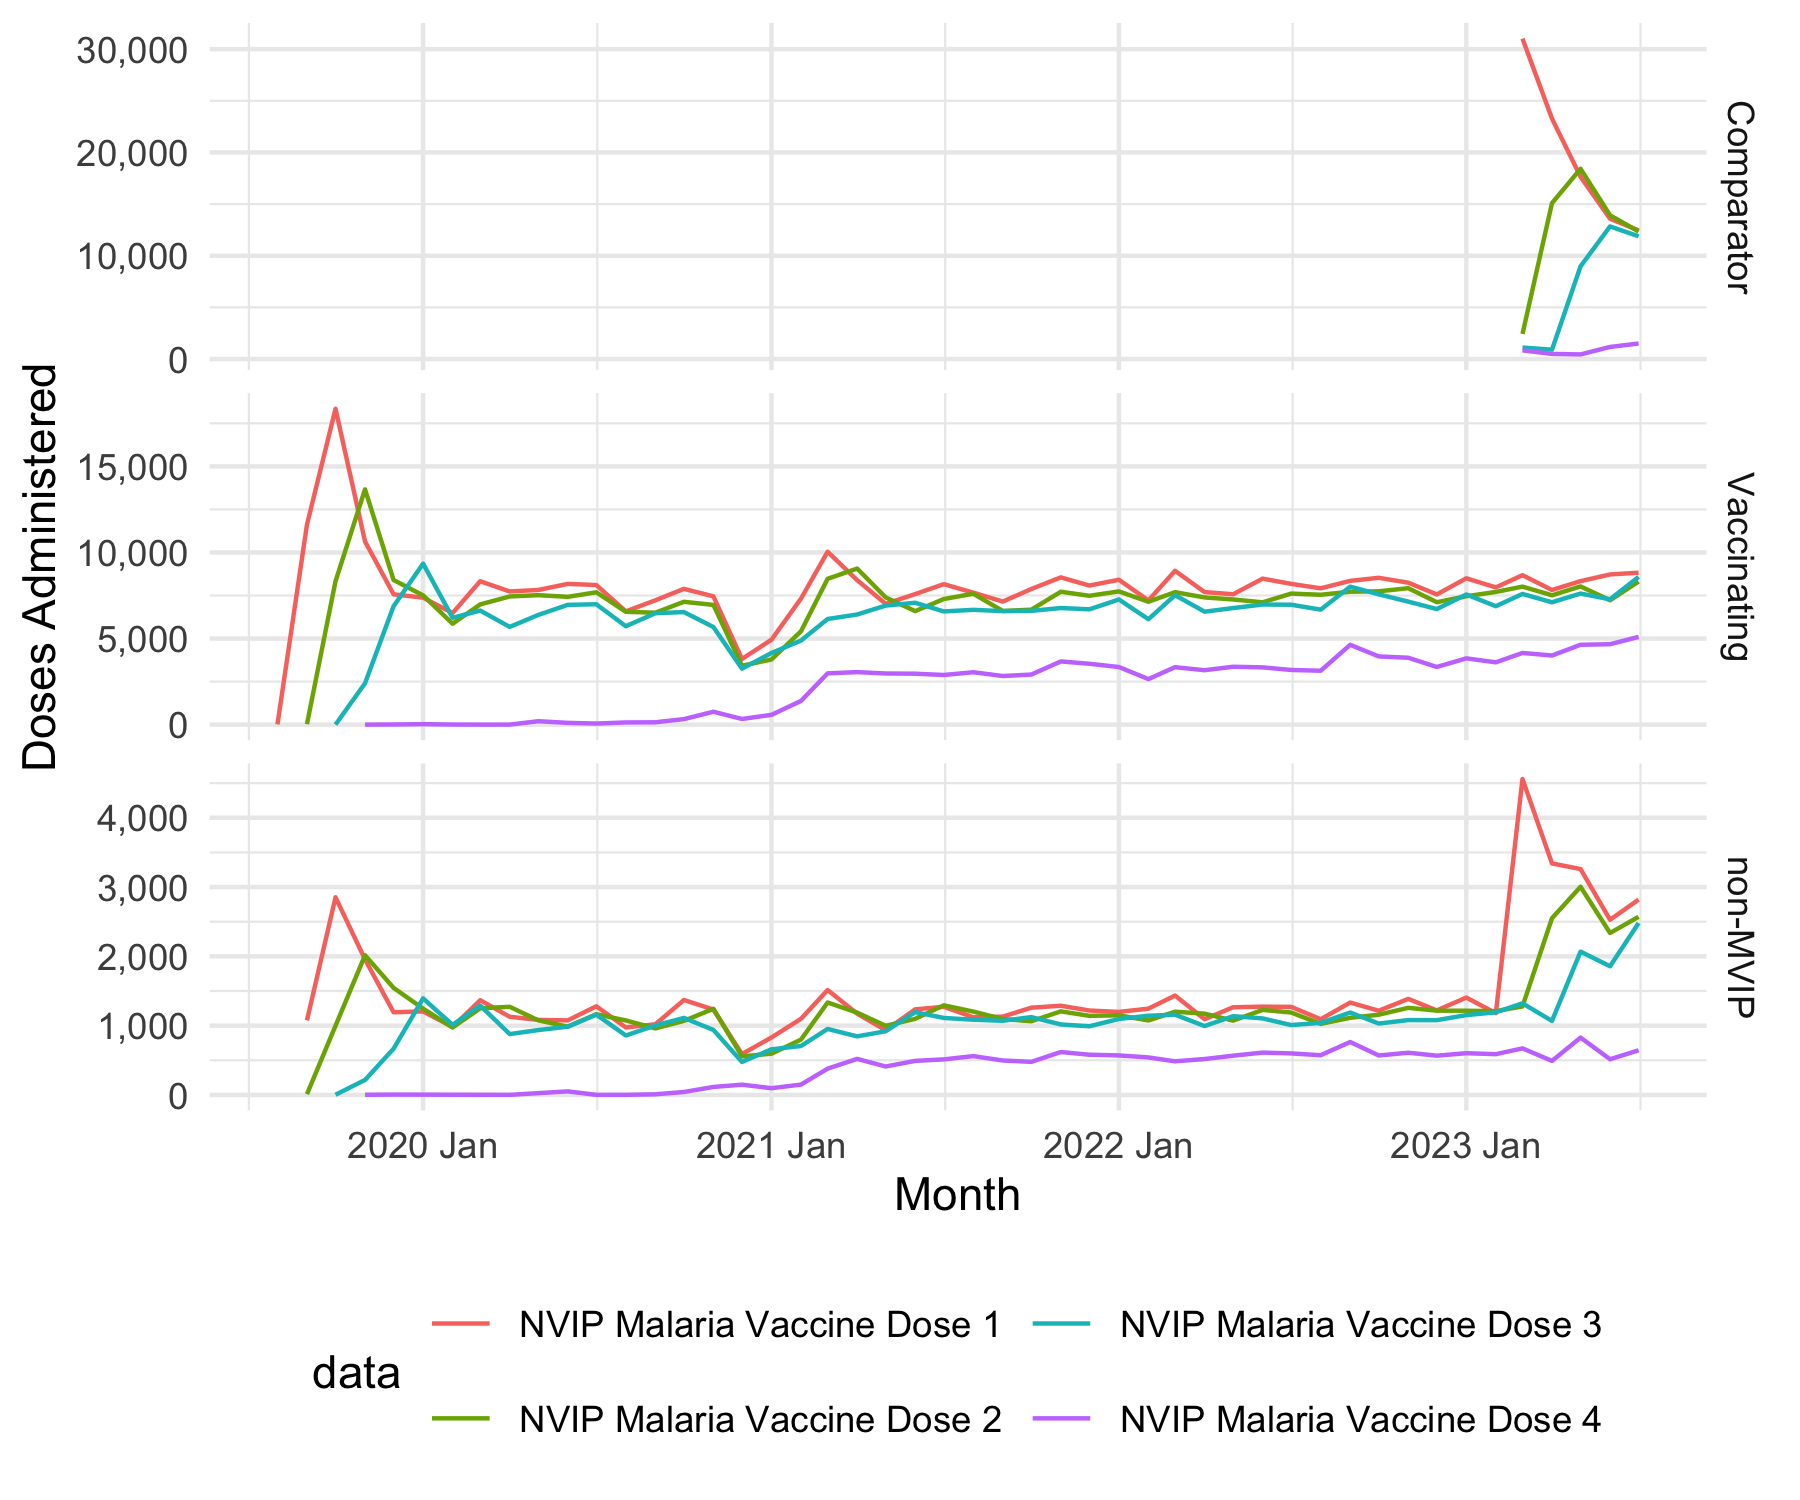  **Figure** 6**.S** Number of RTS,S doses administered by intervention area |
| --- |

- Substantial number of children in the Implementing areas received at least 3 doses by Jan 2020. Administering a 4th doses to substantial number of children began in spring 2021.

| Intervention | level | doses | no_doses |
| --- | --- | --- | --- |
| Comparison | 5 | 6759 | 114 |
| Implementing | 5 | 76901 | 1082 |
| non-MVIP | 4 | 723 | 163 |
| non-MVIP | 5 | 13465 | 150 |

Level 4 indicates a county hospital; level 5 are health facilities. No doses were provided by level 6, the community unit.

### Number of doses by Implementing facility


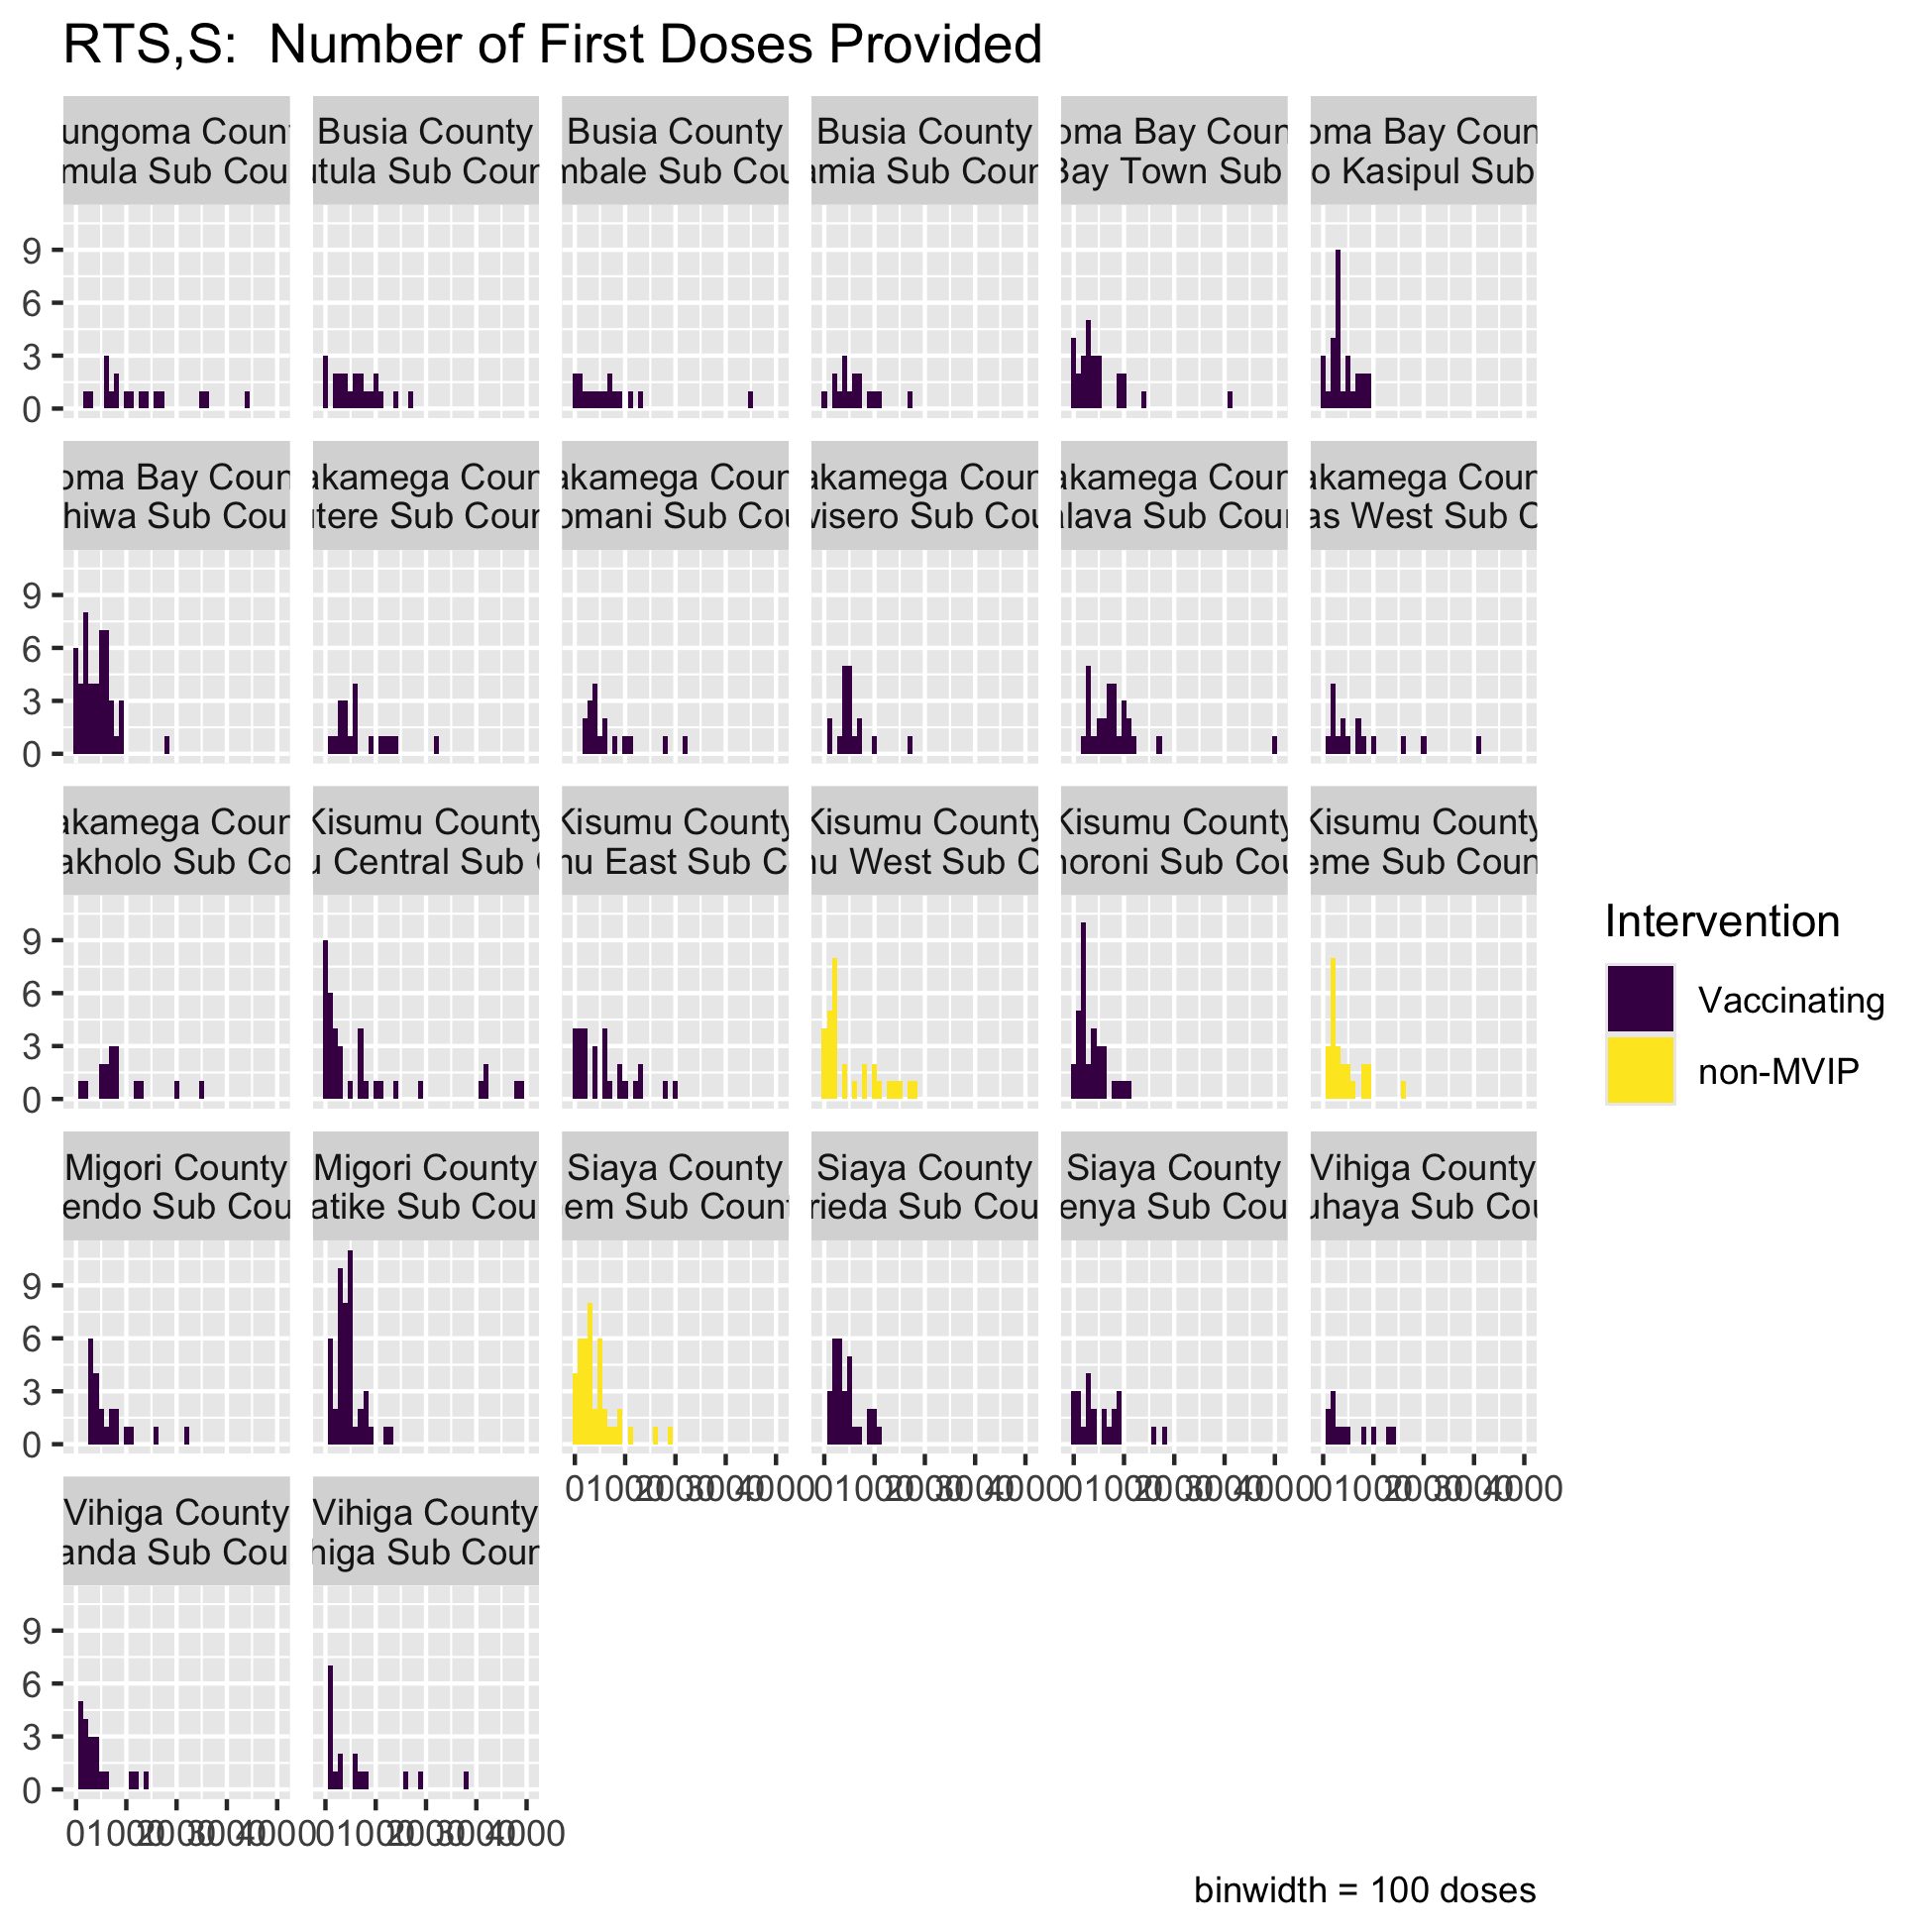


Number of first doses of RTS,S administered in MVIP implementing sub-counties

### Clean vx data

Sample of vx data (first 5 rows)

| orgUnit | data.id | error | n |
| --- | --- | --- | --- |
| A1BCmizFgwx | Rhkz9D6hdZV_NhSoXUMPK2K | none | 42 |
| A1BCmizFgwx | U46JIUFqgvj_NhSoXUMPK2K | none | 43 |
| A1BCmizFgwx | pznTlBTeIb7_NhSoXUMPK2K | none | 29 |
| A1BCmizFgwx | znLJPgpYjpF_NhSoXUMPK2K | none | 41 |
| A2vpkzQnTO0 | Rhkz9D6hdZV_NhSoXUMPK2K | none | 45 |
| A2vpkzQnTO0 | U46JIUFqgvj_NhSoXUMPK2K | none | 46 |

### Vaccination over time


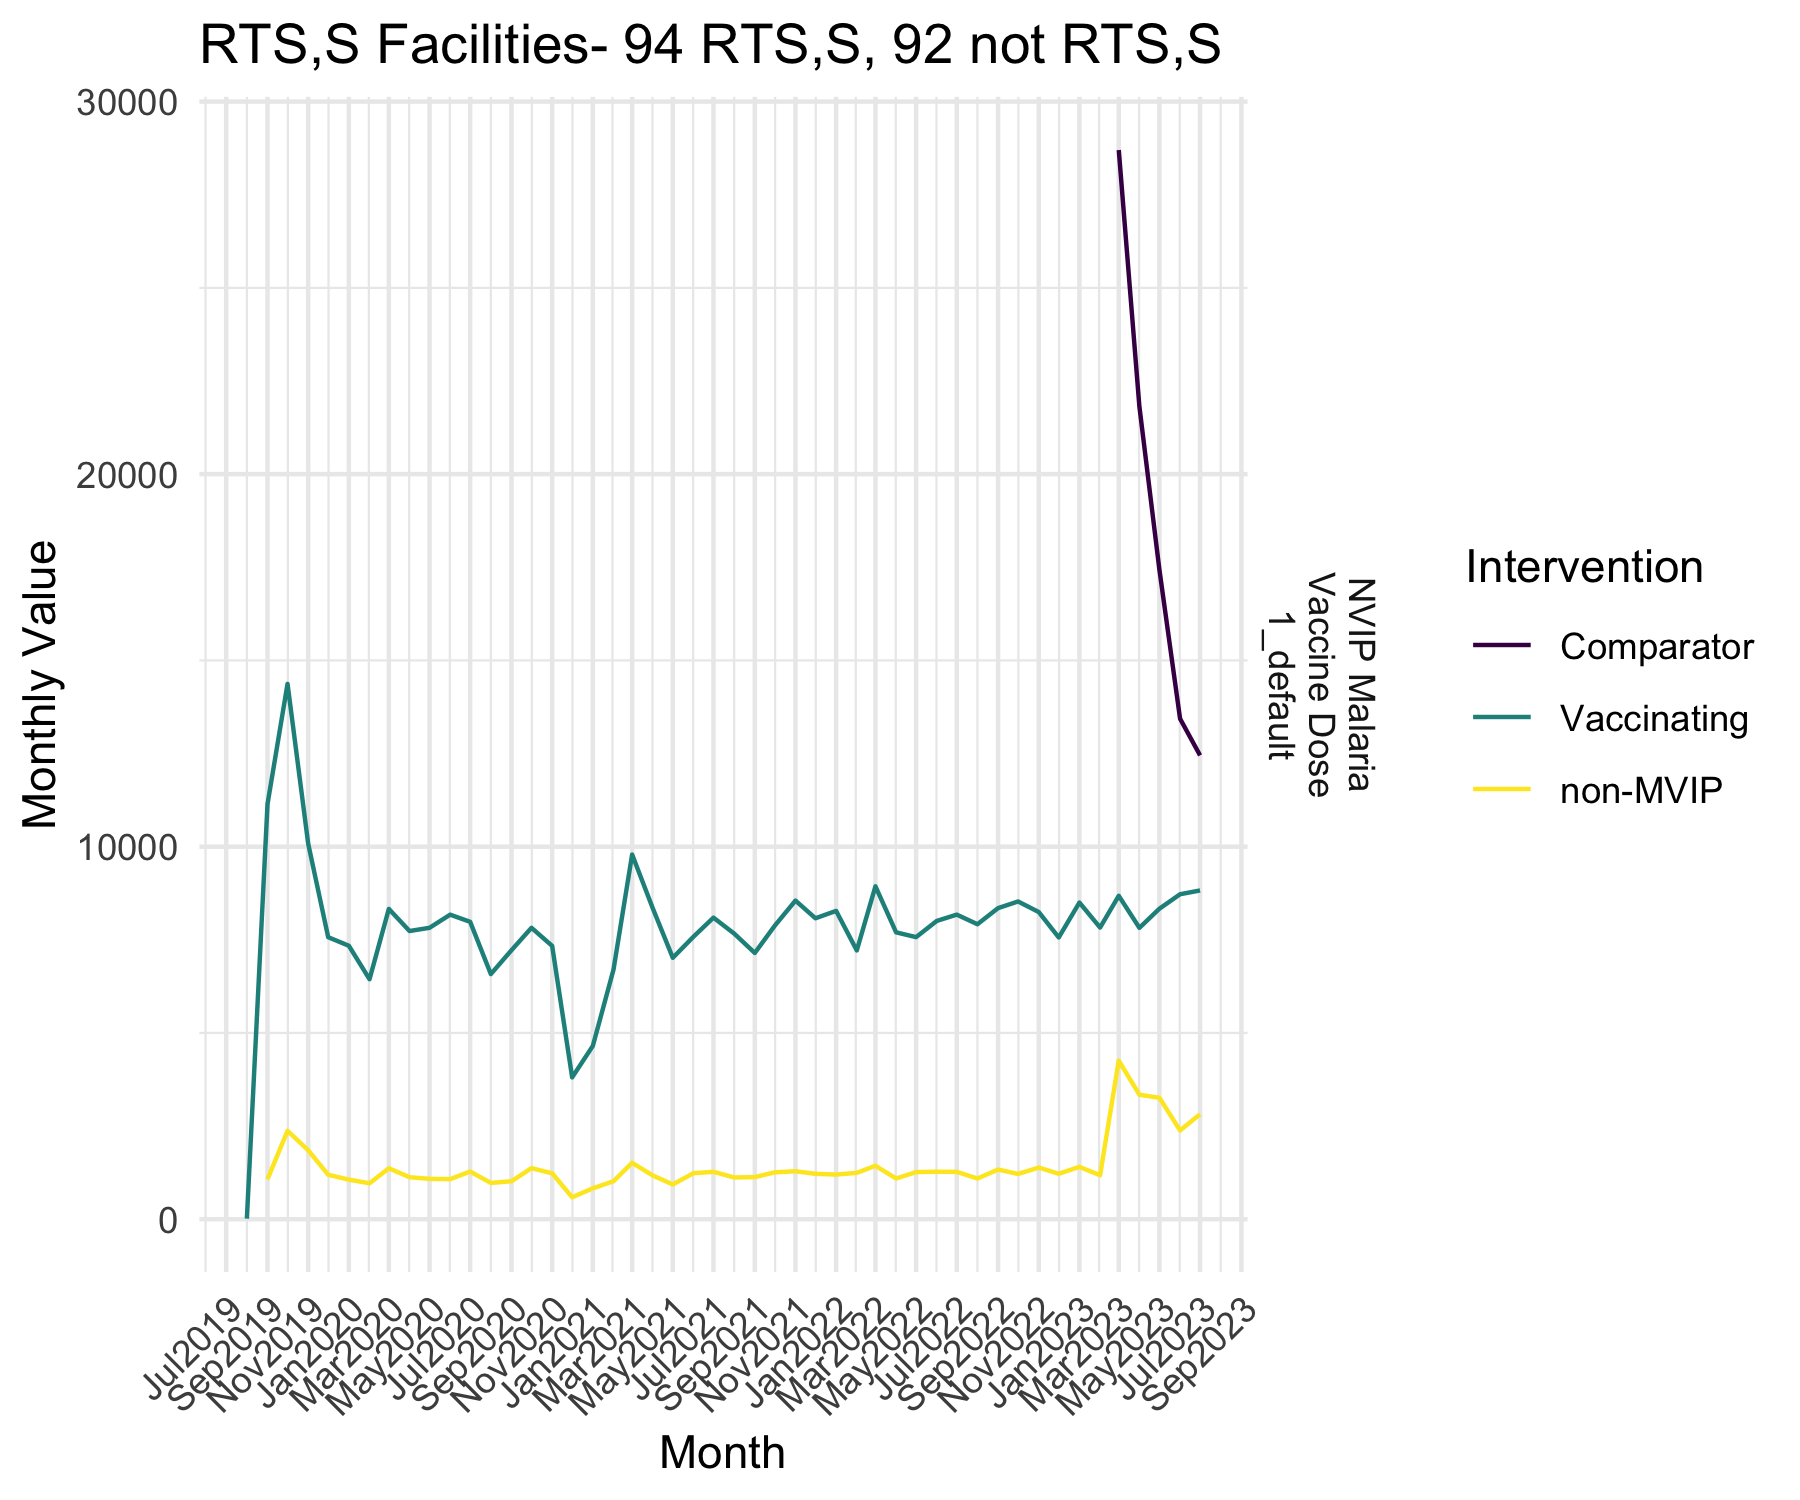


Number of first doses of RTS,S administered in MVIP implementing sub-counties

# Supplement F: Confirmed Cases

## Confirmed Malaria Cases (Kenya Health Information System)

### Clinical cases reported to KHIS

Data were downloaded from KHIS through the DHIS2 API. Successive API calls were made for each data element for all months from Jan 2013 through Dec 2022. An example of the format of the downloaded data was shown in [Section 4](#sec-supplement-c-data-sources).

| Table 14**.S** Sample of data downloaded for confirmed cases   | dataElement | categoryOptionCombo | period | orgUnit | COUNT | SUM | | --- | --- | --- | --- | --- | --- | | OoakJhWiyZp | SeDaCnHi3m5 | 201301 | A2FJEDRHsgv | 1 | 1 | | OoakJhWiyZp | SeDaCnHi3m5 | 201303 | A2FJEDRHsgv | 1 | 30 | | OoakJhWiyZp | SeDaCnHi3m5 | 201306 | A2FJEDRHsgv | 1 | 3 | | OoakJhWiyZp | SeDaCnHi3m5 | 201307 | A2FJEDRHsgv | 1 | 1 | | OoakJhWiyZp | SeDaCnHi3m5 | 201309 | A2FJEDRHsgv | 1 | 11 | |
| --- | --- | --- | --- | --- | --- | --- | --- | --- | --- | --- | --- | --- | --- | --- | --- | --- | --- | --- | --- | --- | --- | --- | --- | --- | --- | --- | --- | --- | --- | --- | --- | --- | --- | --- | --- | --- |

The raw data file was download from KHIS on 2024-09-20 22:17:46.

### Preparing Dataset for Analyses

The raw data was prepared by mapping the data element codes to their corresponding names and converting the R data frame to a tsibble[[10](#ref-tsibble)] time-series dataset.

[Large table omitted from Word document]

## MVIP Clinical Cases: Filter to cases reported by health facilities and CHW in MVIP sub-counties (mcc0)

The reported clinical cases is linked with the file for health facilities (TDODO: link to MVIP_Facilities) and restricted to data submitted prior to January 2023.

- Filter to facilities in MVIP that are below KHIS level 4, i.e. only primary care facilities
- Create agegrp variable for cases <5 and ge5.
- Confirm that all the confirmed cases were MVIP providers and calculate the percentage of MVIP providers that provided malaria clinical.case data.

| level | n_facilities |
| --- | --- |
| 5 | 1,526 |
| 6 | 909 |

[Table 16](#tbl-mvipConfirmedCasesReportsByYear) indicates the number of reports submitted by MVIP providers (health facilities and community health workers) for each data element, and **?@fig-mvipConfirmedCasesReportsByYear** shows the raw (unadjusted) number of confirmed malaria cases reported by MVIP providers.

| Table 15**.S** Number of health providers in MVIP areas reporing data for each data elements, 2013-2022, by KHIS orgUnit level.   | Data Element | 5 | 6 | Total | | --- | --- | --- | --- | | Confirmed Malaria (only Positive cases)_>5 yrs | 1,523 | 3 | 1,526 | | Confirmed Malaria (only Positive cases)_<5 yrs | 1,503 | 2 | 1,505 | | CHEW No. positive_default | 307 | 751 | 1,058 | | CHEW No. positive >= 5_default | 203 | 849 | 1,052 | | CHEW No. positive < 5_default | 206 | 850 | 1,056 | |
| --- | --- | --- | --- | --- | --- | --- | --- | --- | --- | --- | --- | --- | --- | --- | --- | --- | --- | --- | --- | --- | --- | --- | --- | --- |
| Table 16**.S** Annual number of health providers in MVIP areas reporing data for each data elements, 2013-2022   | Data Element | 2013 | 2014 | 2015 | 2016 | 2017 | 2018 | 2019 | 2020 | 2021 | 2022 | | --- | --- | --- | --- | --- | --- | --- | --- | --- | --- | --- | | Confirmed Malaria (only Positive cases)_>5 yrs | 797 | 861 | 916 | 978 | 1,051 | 1,117 | 1,188 | 1,286 | 1,328 | 1,387 | | Confirmed Malaria (only Positive cases)_<5 yrs | 783 | 845 | 904 | 970 | 1,042 | 1,112 | 1,176 | 1,267 | 1,320 | 1,368 | | CHEW No. positive_default |  |  |  | 2 |  | 876 | 872 | 544 | 720 | 56 | | CHEW No. positive >= 5_default |  |  |  |  |  |  |  |  | 826 | 1,045 | | CHEW No. positive < 5_default |  |  |  |  |  |  |  |  | 798 | 1,042 | |

- CHEW positive results were reported for all ages until 2021, when a new form allowed age disaggregation
- In 2021-2022, it may have been possible for some facilities to report on both forms, which would lead to double-counting of cases.
- Were some facilities reporting both CHEW No. positive default and age-group-specific CHEW No. positive?

| Table 17**.S** Monthly number of health providers in MVIP areas reporting data for each data elements, 2021   | Data Element | 2021 Jan | 2021 Feb | 2021 Mar | 2021 Apr | 2021 May | 2021 Jun | 2021 Jul | 2021 Aug | 2021 Sep | 2021 Oct | 2021 Nov | 2021 Dec | 2022 Jan | 2022 Feb | 2022 Mar | 2022 Apr | 2022 May | 2022 Jun | 2022 Jul | 2022 Aug | 2022 Sep | 2022 Oct | 2022 Nov | 2022 Dec | | --- | --- | --- | --- | --- | --- | --- | --- | --- | --- | --- | --- | --- | --- | --- | --- | --- | --- | --- | --- | --- | --- | --- | --- | --- | | Confirmed Malaria (only Positive cases)_>5 yrs | 862 | 1,086 | 1,166 | 1,150 | 1,148 | 1,188 | 1,187 | 1,210 | 1,194 | 1,201 | 1,181 | 1,185 | 1,226 | 1,266 | 1,280 | 1,271 | 1,263 | 1,262 | 1,299 | 1,290 | 1,289 | 1,288 | 1,286 | 1,281 | | Confirmed Malaria (only Positive cases)_<5 yrs | 768 | 996 | 1,060 | 1,073 | 1,081 | 1,108 | 1,108 | 1,141 | 1,110 | 1,140 | 1,101 | 1,132 | 1,152 | 1,192 | 1,220 | 1,197 | 1,190 | 1,230 | 1,230 | 1,219 | 1,226 | 1,235 | 1,223 | 1,202 | | CHEW No. positive_default | 313 | 373 | 397 | 453 | 445 | 376 | 360 | 367 | 464 | 70 | 41 | 28 |  |  |  | 12 |  | 2 | 13 | 1 | 30 | 20 |  | 18 | | CHEW No. positive >= 5_default |  |  |  |  |  |  |  |  | 7 | 472 | 643 | 772 | 765 | 754 | 816 | 813 | 841 | 872 | 886 | 852 | 885 | 881 | 923 | 938 | | CHEW No. positive < 5_default |  |  |  |  |  |  |  |  | 4 | 409 | 583 | 726 | 733 | 720 | 786 | 762 | 805 | 861 | 869 | 830 | 837 | 855 | 887 | 889 | |
| --- | --- | --- | --- | --- | --- | --- | --- | --- | --- | --- | --- | --- | --- | --- | --- | --- | --- | --- | --- | --- | --- | --- | --- | --- | --- | --- | --- | --- | --- | --- | --- | --- | --- | --- | --- | --- | --- | --- | --- | --- | --- | --- | --- | --- | --- | --- | --- | --- | --- | --- | --- | --- | --- | --- | --- | --- | --- | --- | --- | --- | --- | --- | --- | --- | --- | --- | --- | --- | --- | --- | --- | --- | --- | --- | --- | --- | --- | --- | --- | --- | --- | --- | --- | --- | --- | --- | --- | --- | --- | --- | --- | --- | --- | --- | --- | --- | --- | --- | --- | --- | --- | --- | --- | --- | --- | --- | --- | --- | --- | --- | --- | --- | --- | --- | --- | --- | --- | --- | --- | --- | --- | --- | --- | --- | --- | --- | --- | --- | --- | --- | --- | --- | --- | --- | --- | --- | --- | --- | --- | --- | --- | --- | --- | --- | --- | --- | --- | --- | --- | --- |
| Table 18**.S** Annual number of health providers in MVIP areas reporing data for each data elements, 2013-2022   | Data Element | 2013 | 2014 | 2015 | 2016 | 2017 | 2018 | 2019 | 2020 | 2021 | 2022 | | --- | --- | --- | --- | --- | --- | --- | --- | --- | --- | --- | | Confirmed Malaria (only Positive cases)_>5 yrs | 797 | 861 | 916 | 978 | 1,051 | 1,117 | 1,188 | 1,286 | 1,328 | 1,387 | | Confirmed Malaria (only Positive cases)_<5 yrs | 783 | 845 | 904 | 970 | 1,042 | 1,112 | 1,176 | 1,267 | 1,320 | 1,368 | | CHEW No. positive_default |  |  |  | 2 |  | 876 | 872 | 544 | 720 | 56 | | CHEW No. positive >= 5_default |  |  |  |  |  |  |  |  | 826 | 1,045 | | CHEW No. positive < 5_default |  |  |  |  |  |  |  |  | 798 | 1,042 | |
| Table 19**.S** CHEW values entered for both total and age-categories (omitted for space from Word doc) |
| Table 20**.S** The age-disagregations and totals for CHEW values reported by MVIP facilities in 2021-2022   | under5 | over4 | total_under5_over4 | | --- | --- | --- | | 268,516 | 486,281 | 754,797 | |

There were 168 values entered by the same orgUnit for total and age-category CHEW, which totals 1.3238^{4} cases, 1.8% of the total CHEW under5 and over4 cases.

- Censor the total value and retain the age-specific values.
- Explicitly fill-in missing values. For example, if a value was not submitted by a facility in a given month, we explicitly add an entry for that month and assign the value NA. This is done to ensure time-series models see the full time-period without any breaks.
- Save result as mcc (MVIP confirmed cases), a time-series dataset of the raw data with duplicated CHEW values removed.

| 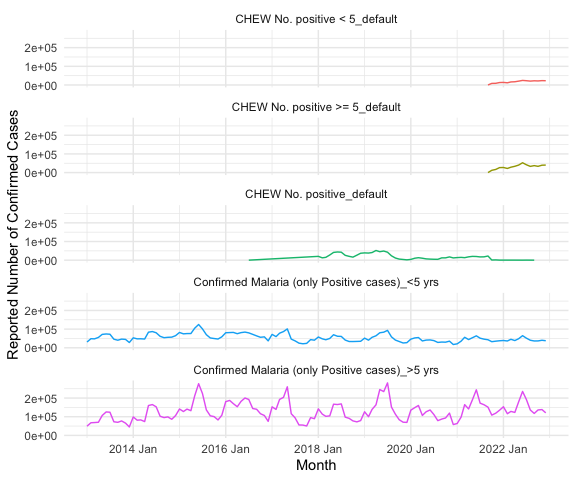  **Figure** 7**.S** Number of reported confirmed cases in MVIP areas, 2013-2022 |
| --- |

`mutate_if()` ignored the following grouping variables:
• Column `data`

| 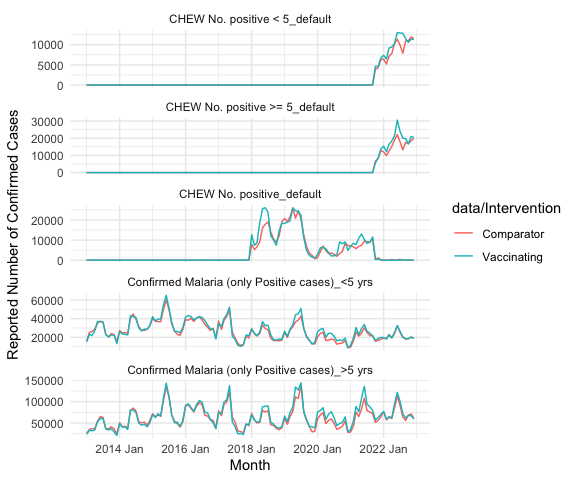  **Figure** 8**.S** Number of reported confirmed cases in MVIP areas, 2013-2022 |
| --- |

The number of cases in implementing areas were similar to the number in comparison areas both before and after introduction of RTSS.

## Identify potential outliers

and create dataset (mcc1) with new column, clean, that has removed outliers.

| Table 22**.S** Number of errors flagged with the seasonal algorithms  * Cleaning.R outlier.summary.tibble  # A tibble: 7 × 6 `Error Flag` N `%N` `Total Value` `%Total Value` `Largest Value`  <chr> <chr> <chr> <chr> <chr> <chr>  1 key_entry_error 0 - 0 - -  2 over_max 0 - 0 - -  3 mad15 219 0.1% 111,509 0.5% 8,383  4 mad10 371 0.1% 116,890 0.5% 2,911  5 seasonal5 691 0.3% 289,267 1.2% 8,383  6 seasonal3 1,548 0.6% 509,776 2.2% 2,911  7 No Error Flags 257,517 99.1% 22,818,895 96.5% 2,388 |
| --- |

## Create mcc3 with new variables for case type (OPD, CHW)

Community cases are associated with health facilities and should be combined before scanning for consistently reporting facilities. We assume that community cases occurred in catchment area of their parent facility and that in order to assess the trends in cases in each catchment area, the community cases should be combined with their respective health facility cases. We assume that cases diagnosed at community would otherwise have been diagnosed at the health facility. However, it is possible that the increased access to care provided by CHW (starting Jan 2018) could have increased the total number of reported cases.

Unfortunately, the community cases in 2018-late 2021 were not age disaggregated and therefore cannot be included in age-specific models of vaccine impact. We are able to include the cases reported with age disaggregation on the revised reporting form in late 2021.

We combine the CHEW cases with their respective health facility with new variables to indicate age group and source of confirmation (CHEW vs OPD) data from CHEW and facilities

Note that CHW replaced the default category with “<5” and “>5” in 2021. We assume that all of the CHW reported prior to 2021 were in “<5” and recode “default” as “<5”

| Table 23**.S** Number of health providers reporting outpatient (OPD) and community (CHW) confirmed malaria cases   | case_type | level | Over4 | Under5 | unknown | | --- | --- | --- | --- | --- | | CHW | 5 | 203 | 206 | 307 | | CHW | 6 | 849 | 850 | 740 | | OPD | 5 | 1,523 | 1,503 |  | | OPD | 6 | 3 | 2 |  | |
| --- | --- | --- | --- | --- | --- | --- | --- | --- | --- | --- | --- | --- | --- | --- | --- | --- | --- | --- | --- | --- | --- | --- | --- | --- | --- |
| Table 24**.S** Number of cases confirmed by (OPD) and community (CHW) health-care providers (potential outliers removed)   | case_type | Over4 | Under5 | unknown | | --- | --- | --- | --- | | CHW | 477,632 | 261,290 | 942,065.8 | | OPD | 14,902,967 | 6,234,940 |  | |

When age-groups reporting was available for CHEW (2021-2022), under5 accounted for 35.4% of cases. Applying that percentage to the unknown age CHEW cases suggests 333,124 under5 cases from 2018-2020 may not be included. This is approximately 20.3%of OPD cases during same years.


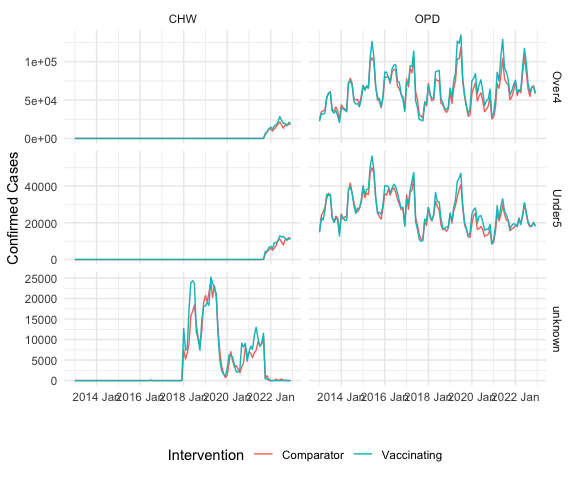


## Associate CHW cases with their corresponding OPD, creating a new variable, opdUnit

Some CHEW report using the same orgUnit id as the health facilities that report OPD cases; some report using the health facility as their parent; and some CHEW report to the health facility two levels above (e.g. grandparent). Cases reported by CHW are possibly cases that would otherwise have been reported by the OPD. Therefore, we associate all of these CHEW reports to their respective OPD orgUnit (‘effectiveOrgUnit’) before aggregating the data. The data for each age group will then be aggregated to each health facility. We will use that data to determine facilities that consistently report. Those facilities that consistently report will be included in the final aggregation by intervention (comparison and implementing).

# A tibble: 20 × 7
# Groups: Intervention, case_type, agegrp [10]
 Intervention case_type agegrp level ou eou same
 <fct> <chr> <chr> <int> <int> <int> <int>
 1 Comparison CHW Over4 5 90 90 90
 2 Comparison CHW Over4 6 389 226 1
 3 Comparison CHW Under5 5 93 93 93
 4 Comparison CHW Under5 6 391 230 1
 5 Comparison CHW unknown 5 139 139 139
 6 Comparison CHW unknown 6 358 221 0
 7 Comparison OPD Over4 5 778 778 778
 8 Comparison OPD Over4 6 2 2 2
 9 Comparison OPD Under5 5 766 766 766
10 Comparison OPD Under5 6 1 1 1
11 Implementing CHW Over4 5 113 113 113
12 Implementing CHW Over4 6 460 275 1
13 Implementing CHW Under5 5 113 113 113
14 Implementing CHW Under5 6 459 275 1
15 Implementing CHW unknown 5 168 168 168
16 Implementing CHW unknown 6 382 250 1
17 Implementing OPD Over4 5 745 745 745
18 Implementing OPD Over4 6 1 1 1
19 Implementing OPD Under5 5 737 737 737
20 Implementing OPD Under5 6 1 1 1

[1] 519

We associated 519 of 521 CHEW orgUnits with their parent OPD.

| Table 25**.S** Number of OPD facilities and CHEW health providers are associated with an OPD   | Intervention | case_type | OPD | | --- | --- | --- | | Comparison | CHW | 579 | | Comparison | OPD | 782 | | Implementing | CHW | 666 | | Implementing | OPD | 746 | |
| --- | --- | --- | --- | --- | --- | --- | --- | --- | --- | --- | --- | --- | --- | --- | --- |

(NB: the missing values are due to the fill_gaps procedure)

## Aggregate across opdUnits (mcc4)

Data is summarised by across each effectiveOrgUnit by Intervention and age group. After summarising, the effectiveOrgUnit is set as the orgUnit (for comparability with required input in modeling and other functions). Cleaned and consolidated dataset created (mcc4) with all facilities that reported 2013-2022.


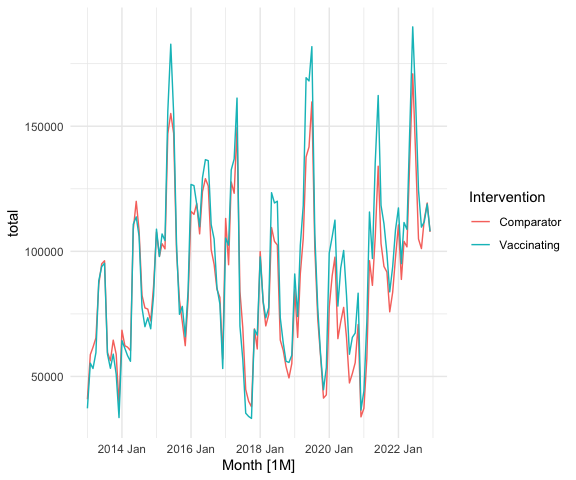


| Table 26**.S** Characteristics of included data   | agegrp | Intervention | Facilities | Reports | Cases | Cases_clean | Percent_Clean | | --- | --- | --- | --- | --- | --- | --- | | Over4 | Comparison | 781 | 93,720 | 7,724,861 | 7,428,298 | 96.2% | | Over4 | Implementing | 747 | 89,640 | 8,207,446 | 7,952,301 | 96.9% | | Under5 | Comparison | 768 | 92,160 | 3,282,088 | 3,154,371 | 96.1% | | Under5 | Implementing | 739 | 88,680 | 3,462,657 | 3,341,859 | 96.5% | |
| --- | --- | --- | --- | --- | --- | --- | --- | --- | --- | --- | --- | --- | --- | --- | --- | --- | --- | --- | --- | --- | --- | --- | --- | --- | --- | --- | --- | --- | --- | --- | --- | --- | --- | --- | --- |

NB: Percent_Clean refers to the percentage of the number of reported cases that are left after cleaning. It does not mean that x% of values were clean, just that filter to values not flagged as potential outliers resulted in x% of the total value.

By combining CHW data with its associated OPD facility, the dataset was reduced to 364200 from 742320.

| 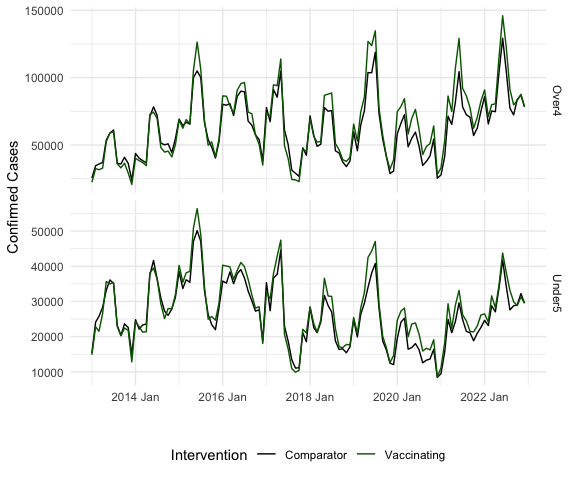  **Figure** 9**.S** Number of confirmed malaria cases reported by age group in the MVIP implementing and comparison areas. |
| --- |

Prior to introduction of RTSS, the number of reported under5 confirmed cases in the implementing areas was greater than the number reported in comparison areas (2018-2019), but the difference appears to decrease in 2020-2020. Conversely, in the over4 cases, the difference is less and does not appear to change as much.

# Supplement G: Consistently Reporting Facilities

## Facilities reporting confirmed malara cases

if (!exists( "mcc0" ) ) mcc0 = readRDS( paste0( params$output.dir , 'mcc0.rds' ) )

if (!exists( "mcc3" ) ) mcc3 = readRDS( paste0( params$output.dir , 'mcc3.rds' ) )

if (!exists( "mcc4" ) ) mcc4 = readRDS( paste0( params$output.dir , 'mcc4.rds' ) )


# reported vaccinations
if (!exists( "vx" ) ) vx = readRDS( paste0( params$data.dir, 'vx.rds' ))

if (!exists( "mvip.boundaries.interventions" ) ) mvip.boundaries.interventions = readRDS( paste0( params$data.dir, 'mvip.boundaries.interventions.rds' ) )

if (!exists( "mvip.facilities" ) ) mvip.facilities = readRDS( paste0( params$data.dir, 'mvip.facilities.rds' ) )

if (!exists( 'base_map') ) base_map = read_rds( paste0( params$output.dir , 'base_map.rds' ))

### TODO: Stratify reporting by dataset (case type)

### TODO: faclities reported should be length( unique(mcc1$orgUnit)) = 2435

mcc4 %>%
 dqaPercentReporting() %>%
 dqa_reporting_plot( text_size = 12 ) +
 theme_minimal( )

| 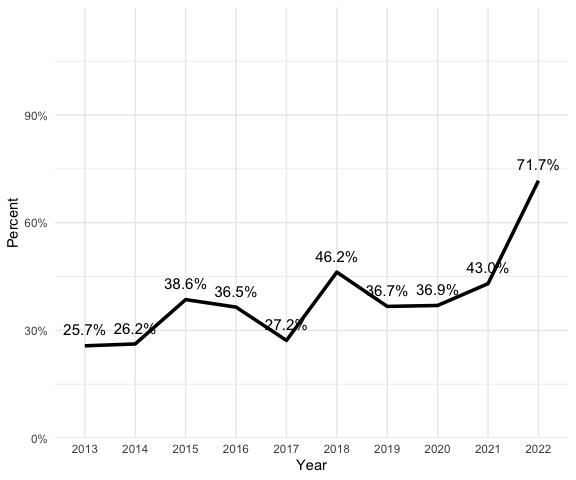  **Figure** 10**.S** Percentage of OPD facilities reporting confirmed cases all 12 months of the year |
| --- |

facilities.reporting( mcc4 )

| 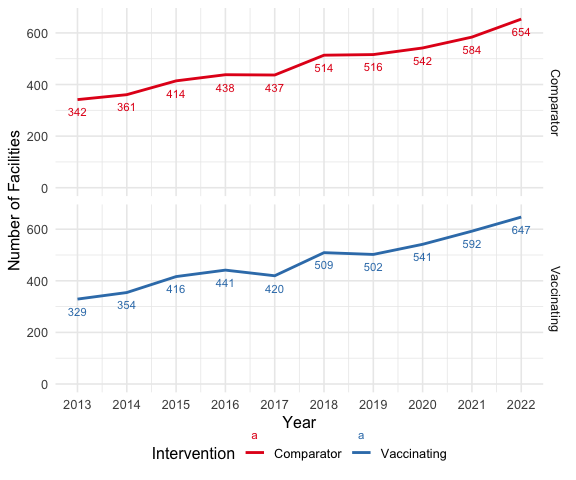  **Figure** 11**.S** Mean number of opd facilities reporting confirmed cases each month by intervention area |
| --- |

dataset.consisency( mcc4 )

| 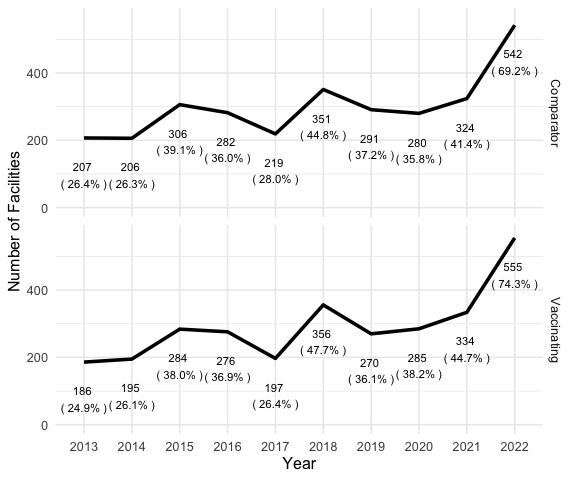  **Figure** 12**.S** Number of facilities consistently reporting (12 of 12 months) confirmed cases each year by intervention area |
| --- |

Characteristics facilities reporting confirmed malaria cases (selected = TRUE) compared with those facilities not reporting confirmed cases (selected = FALSE)

d = facility_characteristics( mcc4, vx,
 # select all facilities
 selected_facilities = unique(mcc4$orgUnit) ) %>%
 ungroup

ft_characteristics( d )

| **Intervention** | **selected** | **Facilities** | **MOHa** | **<5y Malaria(%)** | **RTS,S Doses(%)** | **PBO-netsb** | **IRSc** |
| --- | --- | --- | --- | --- | --- | --- | --- |
| Comparison | TRUE | 781 | 56.1% | 2,494,963 (46.2%) | 0 (0.0%) | 39.1% | 44.6% |
| Implementing | TRUE | 747 | 57.3% | 2,680,241 (49.7%) | 928,646 (100.0%) | 32.7% | 29.7% |
| Comparison |  | 1 | NaN% | 104,613 (1.9%) | 0 (0.0%) | 52.1% | 26.4% |
| Implementing |  | 1 | NaN% | 115,899 (2.1%) | 0 (0.0%) | 35.6% | 15.0% |
| a: Percent of facilities owned by Ministry of Health. Other facilities owned by 'Private', 'Mission/Faith-Based Organization', or 'Non-Governmental Organization'. Owner was not incidated for 24.8% of facilities | | | | | | | |
| b: Percent of facilities where PBO nets distributed during mass campaign in 2021 | | | | | | | |
| c: Percent of facilities where IRS applied annually | | | | | | | |

saveRDS( d, paste0( params$output.dir , 'mvip-facility-characteristics.rds' ) )

The facilities reporting confirmed cases were also the ones that reported 99.7% of RTSS doses. Among these, the percentage of facilities receiving PBO nets during the 2021 mass bednet campaign was greater in the comparison area (39.1% vs 32.7%).

## Facilities Consistently Reporting Confirmed Cases Each Month

To assess the potential reporting bias, we will look at the consistency of monthly reporting. Ideally, all facilities report each and every month.

To remove reporting bias from the evaluation period, we want to include only those facilities that reported each and every month during the study period (Jan 2020 - Dec 2022) and as many months as possible prior to Jan 2020. At least 24 months of data required to develop prediction models with seasonal data. An additional 12 months of data is required to validate the prediction models. Therefore, we want to assess the number of consistently reporting facilities from no later than Jan 2017 through Dec 2022.

As facilities were being added to to KHIS-DHIS2, more facilities reported each year up to and including 2017. Therefore, there will likely be a tradeoff between an having more months available for modeling and the number of facilities consistently reporting.

A facility was counted as having reported consistently if either the facility or associated CHW reported for that month. It some months the CHW did not report, so this assumes that when CHW did not report cases, the cases were reported by the facility. This could be the case when CHW are stocked-out of test kits and patients could only be tested at the nearest facility.

##

evaluation_consistency %>% select( -Facilities ) %>%
 pivot_wider( names_from = "MissingPerYr" , values_from = N ) %>%
 flextable() %>% FitFlextableToPage()

| Intervention | 0 | 1 | 2 | 3 | 4 | 5 | 6 | 7 | 8 | 9 | 10 | 11 |
| --- | --- | --- | --- | --- | --- | --- | --- | --- | --- | --- | --- | --- |
| Comparison | 198 | 330 | 405 | 466 | 508 | 532 | 557 | 571 | 586 | 594 | 604 | 614 |
| Implementing | 206 | 348 | 419 | 477 | 511 | 538 | 559 | 574 | 582 | 593 | 602 | 612 |

# saveRDS( evaluation_consistency, paste0( params$data.dir , 'evaluation_consistency.rds') )

While as many as 1226 facilities reported during this period, only 410 reported all months.

## Consistent reporting pre-intervention through the evaluation period

# reporting_consistency %>%
# select( -Facilities ) %>%
# pivot_wider( names_from = "MissingPerYr" , values_from = N ) %>%
# kable

reporting_consistency %>%
 filter( ! is.na( Intervention )) %>%
 select( -Facilities ) %>%
 pivot_wider( names_from = "MissingPerYr" , values_from = N ) %>%
 arrange( Starting, Intervention ) %>%
 gt( rowname_col = "Intervention"
 , groupname_col = "MissingPerYr"
 ) %>%
 tab_header( title = "Number of Facilities Reporting Confirmed Cases Each Month" ,
 subtitle = "allow 0-2 missing reports per year")

| Table 1: Number of Facilities Reporting Confirmed Cases Each Month  allow 0-2 missing reports per year   |  | Starting | 0 | 1 | 2 | | --- | --- | --- | --- | --- | |  |  |  |  |  | | Comparison | 2013 Jan | 43 | 108 | 148 | | Implementing | 2013 Jan | 28 | 97 | 144 | | Comparison | 2013 Jul | 46 | 118 | 156 | | Implementing | 2013 Jul | 31 | 106 | 152 | | Comparison | 2014 Jan | 48 | 120 | 162 | | Implementing | 2014 Jan | 35 | 108 | 155 | | Comparison | 2014 Jul | 52 | 134 | 180 | | Implementing | 2014 Jul | 42 | 124 | 177 | | Comparison | 2015 Jan | 55 | 139 | 182 | | Implementing | 2015 Jan | 47 | 132 | 182 | | Comparison | 2015 Jul | 61 | 147 | 190 | | Implementing | 2015 Jul | 51 | 140 | 191 | | Comparison | 2016 Jan | 66 | 151 | 194 | | Implementing | 2016 Jan | 59 | 146 | 197 | | Comparison | 2016 Jul | 72 | 160 | 204 | | Implementing | 2016 Jul | 68 | 158 | 212 | | Comparison | 2017 Jan | 81 | 165 | 210 | | Implementing | 2017 Jan | 72 | 165 | 216 | | Comparison | 2017 Jul | 85 | 173 | 227 | | Implementing | 2017 Jul | 83 | 180 | 241 | | Comparison | 2018 Jan | 118 | 206 | 268 | | Implementing | 2018 Jan | 112 | 235 | 314 | | Comparison | 2018 Jul | 126 | 219 | 281 | | Implementing | 2018 Jul | 127 | 249 | 327 | | Comparison | 2019 Jan | 147 | 243 | 307 | | Implementing | 2019 Jan | 137 | 261 | 339 | | Comparison | 2019 Jul | 163 | 263 | 336 | | Implementing | 2019 Jul | 156 | 277 | 357 | | Comparison | 2020 Jan | 198 | 330 | 405 | | Implementing | 2020 Jan | 206 | 348 | 419 | | Comparison | 2020 Jul | 237 | 385 | 468 | | Implementing | 2020 Jul | 240 | 396 | 476 |   **Figure** 13 |
| --- | --- | --- | --- | --- | --- | --- | --- | --- | --- | --- | --- | --- | --- | --- | --- | --- | --- | --- | --- | --- | --- | --- | --- | --- | --- | --- | --- | --- | --- | --- | --- | --- | --- | --- | --- | --- | --- | --- | --- | --- | --- | --- | --- | --- | --- | --- | --- | --- | --- | --- | --- | --- | --- | --- | --- | --- | --- | --- | --- | --- | --- | --- | --- | --- | --- | --- | --- | --- | --- | --- | --- | --- | --- | --- | --- | --- | --- | --- | --- | --- | --- | --- | --- | --- | --- | --- | --- | --- | --- | --- | --- | --- | --- | --- | --- | --- | --- | --- | --- | --- | --- | --- | --- | --- | --- | --- | --- | --- | --- | --- | --- | --- | --- | --- | --- | --- | --- | --- | --- | --- | --- | --- | --- | --- | --- | --- | --- | --- | --- | --- | --- | --- | --- | --- | --- | --- | --- | --- | --- | --- | --- | --- | --- | --- | --- | --- | --- | --- | --- | --- | --- | --- | --- | --- | --- | --- | --- | --- | --- | --- | --- | --- | --- | --- | --- | --- | --- | --- | --- | --- |

Our criteria for selecting the consistently reporting facilities are:

1. Have the fewest number of missing months-ideally zero-as any missed month introduces unknown bias.
2. To have at least 3 years of data prior to the intervention to have the most data for validating the models used to predict the number of cases during the intervention period (the counterfactual).
3. To include as many facilities as possible, assuming that at least 100 facilities in each intervention required to make representative sample.

## Map of included facilities (preliminary)

if (!exists( "mvip.boundaries.interventions" ) ) mvip.boundaries.interventions = readRDS( paste0( params$data.dir, 'mvip.boundaries.interventions.rds' ) )

if (!exists( "mvip.facilities" ) ) mvip.facilities = readRDS( paste0( params$output.dir, 'mvip.facilities.rds' ) )

# note that some coordinates are outside MVIP, probably because of data entry error
boundaryBox = mvip.boundaries.interventions %>% st_bbox()

included.facilities = mvip.facilities %>%
 mutate( included = ifelse( orgUnit %in% consistently_reporting_facilities, 'Included', 'Excluded' ))


if (!exists( 'base_map') ) read_rds( paste0( params$data.dir , 'base_map.rds' ))

base_map +

 geom_sf( data = included.facilities %>%
 filter( included == "Excluded" , level == 5) ,
 # color = 'red' ,
 alpha = .5 , size = .5 , shape = 21 ,
 aes( fill = Intervention, color = included, level == 5 ) ) +

 geom_sf( data = included.facilities %>%
 filter( included == "Included" ),
 # color = 'blue' ,
 size = 1 , shape = 21 ,
 aes( fill = Intervention , color = included ) ) +

 scale_color_manual(
 labels = c("Excluded", "Included" ),
 values = c( "red", "blue") ) +


 coord_sf(
 xlim = c( boundaryBox[1], boundaryBox[3]),
 ylim = c(boundaryBox[2], boundaryBox[4] ),
 expand = FALSE
 )

Coordinate system already present. Adding new coordinate system, which will
replace the existing one.


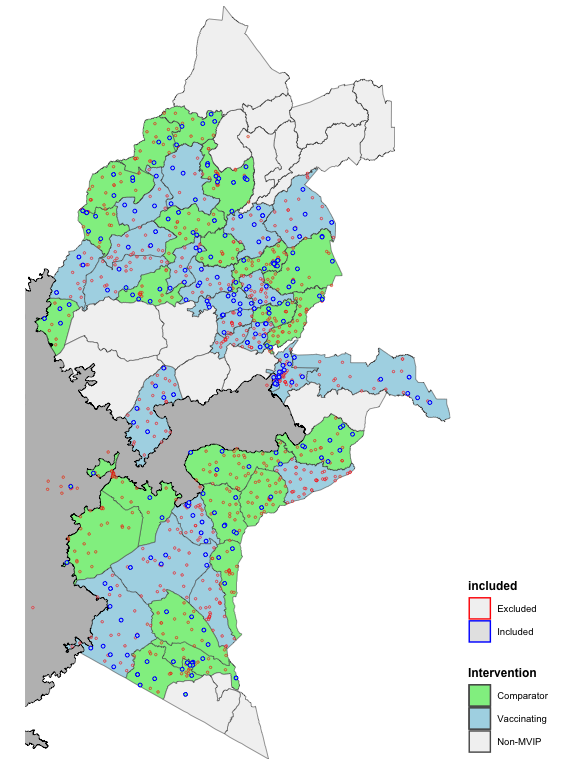


ggsave( paste0( params$output.dir , 'selected.facilities.map.png' ), width = 6, dpi = 300 )

Saving 6 x 8 in image

## With the choice of number of facilities, we save the analytic Dataset (mcc5)

mcc5 = mcc4 %>%
 filter( orgUnit %in% consistently_reporting_facilities,
 Month >= start_month )

mcc5 %>% as_tibble %>% ungroup %>% group_by( Intervention ) %>%
 summarise( Facilities = n_distinct( orgUnit )) %>% flextable()

| Intervention | Facilities |
| --- | --- |
| Comparison | 139 |
| Implementing | 132 |

saveRDS( mcc5 , paste0( params$output.dir , 'mcc5.rds') )

mcc5 %>%
 dqaPercentReporting() %>%
 dqa_reporting_plot( text_size = 12 ) +
 theme_minimal( )

| 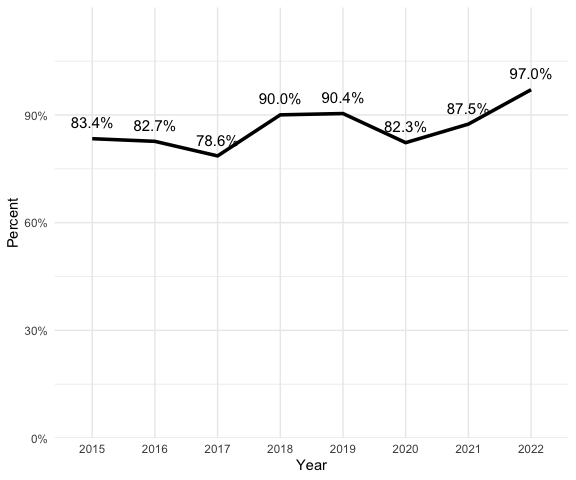  **Figure** 14**.S** Percentage of facilities reporting confirmed cases all 12 months |
| --- |
| 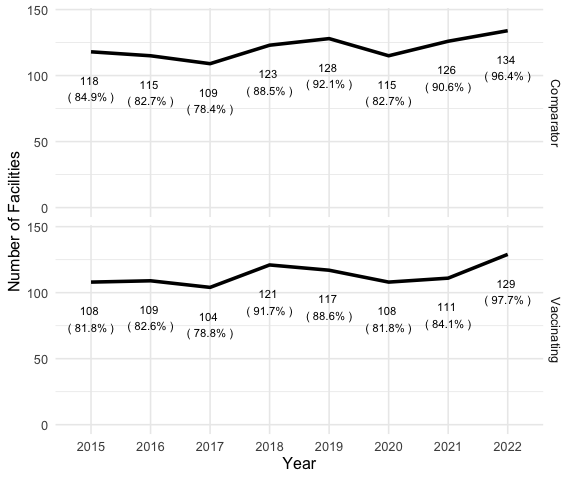  **Figure** 15**.S** Number of facilities consistently reporting confirmed cases each year |

Characteristics facilities reporting confirmed malaria cases (selected = TRUE) compared with those facilities not reporting confirmed cases (selected = FALSE)

d = facility_characteristics( mcc5, vx,
 # select all facilities
 selected_facilities = unique(mcc5$orgUnit) ,
 errs = F )

saveRDS( d, paste0( params$output.dir , 'mcc5-characteristics.rds' ) )

ft_characteristics( d , errs = F )

| **Intervention** | **selected** | **Facilities** | **MOHa** | **<5y Malaria(%)** | **RTS,S Doses(%)** | **PBO-netsb** | **IRSc** |
| --- | --- | --- | --- | --- | --- | --- | --- |
| Comparison | TRUE | 139 | 60.4% | 1,004,891 (18.6%) | 0 (0.0%) | 46.8% | 33.8% |
| Implementing | TRUE | 132 | 59.1% | 944,082 (17.5%) | 374,001 (40.3%) | 45.5% | 18.9% |
| Comparison |  | 642 | 55.0% | 1,594,685 (29.6%) | 0 (0.0%) | 43.3% | 38.8% |
| Implementing |  | 615 | 56.9% | 1,852,058 (34.3%) | 554,645 (59.7%) | 32.4% | 24.5% |
| a: Percent of facilities owned by Ministry of Health. Other facilities owned by 'Private', 'Mission/Faith-Based Organization', or 'Non-Governmental Organization'. Owner was not incidated for 24.8% of facilities | | | | | | | |
| b: Percent of facilities where PBO nets distributed during mass campaign in 2021 | | | | | | | |
| c: Percent of facilities where IRS applied annually | | | | | | | |

By selecting for consistently reporting facilities, the percentage of facilities in areas receiving PBO nets is now essentially the same in both intervention areas. We did not anticipate that the selection of consistently reporting facilities would have this effect, which makes the two groups potentially more comparable. While the number of facilities in areas receiving PBO nets is essentially the same, it is possible that the size of facility are different.

Reporting bias during the pre-MVIP period (pre-2020) may be mitigated by models that link under-5 with over-5 cases. In principle, the modeled number of under-5 will reflect changes in over-5 regardless if the change is due to under-reporting or actual changes in malaria incidence. During the evaluation period, there is a risk that under-reporting will confound the impact assessment.

### TODO: code numbers in next paragraph, as they have changed…..

Among the comparison group, the number of consistently reporting facilities ranges from 140-150. The range is greater in the implementing group, particularly during the evaluation period (2020-2023): 116-137 versus 131-150. As the reporting increases, the apparent impact will be reduced.

# Consistently_reporting_evaluation_facilities (12/12 months during evaluation period) (mcc6)

To eliminate this potential confounder during the evaluation period, we will limit the facilities to those that reported every month during the evaluation period.

start_month = yearmonth("Jan 2020")
allowable_missing = 0

consistently_reporting_evaluation_facilities = reporting_consistency %>%
 filter( Starting == start_month &
 MissingPerYr == allowable_missing ) %>%
 pull( Facilities ) %>% unlist

mcc6 = mcc5 %>%
 filter( orgUnit %in% consistently_reporting_evaluation_facilities )

mcc6 %>% as_tibble %>% ungroup %>% group_by( Intervention ) %>%
 summarise( Facilities = n_distinct( orgUnit )) %>% flextable()

| Intervention | Facilities |
| --- | --- |
| Comparison | 104 |
| Implementing | 93 |

saveRDS( mcc6 , paste0( params$output.dir , 'mcc6.rds') )

dataset.consisency( mcc6 )

| 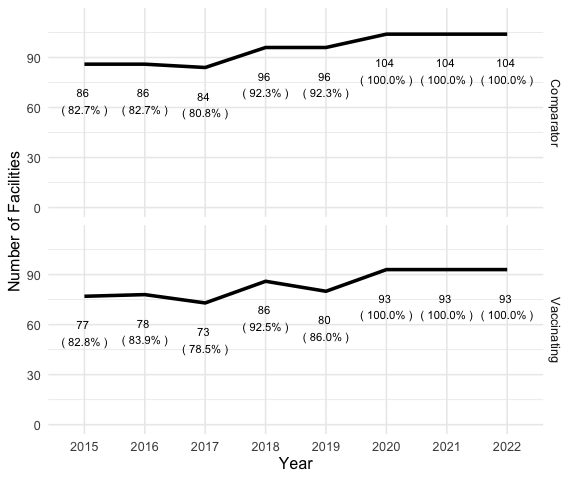  **Figure** 16**.S** Number of facilities always reporting confirmed cases (12 of 12 months each year) during evaluation period (Jan 2020-Dec 2022) and at least 11 of 12 months each year prior. |
| --- |

| **Intervention** | **selected** | **Facilities** | **MOHa** | **<5y Malaria(%)** | **RTS,S Doses(%)** | **PBO-netsb** | **IRSc** |
| --- | --- | --- | --- | --- | --- | --- | --- |
| Comparison | TRUE | 104 | 63.5% | 842,767 (15.6%) | 0 (0.0%) | 50.0% | 26.9% |
| Implementing | TRUE | 93 | 55.9% | 655,748 (12.2%) | 267,038 (28.8%) | 47.3% | 10.8% |
| Comparison |  | 677 | 54.8% | 1,756,809 (32.6%) | 0 (0.0%) | 43.1% | 39.3% |
| Implementing |  | 654 | 57.5% | 2,140,392 (39.7%) | 661,608 (71.2%) | 32.7% | 25.0% |
| a: Percent of facilities owned by Ministry of Health. Other facilities owned by 'Private', 'Mission/Faith-Based Organization', or 'Non-Governmental Organization'. Owner was not indicated for 24.8% of facilities | | | | | | | |
| b: Percent of facilities where PBO nets distributed during mass campaign in 2021 | | | | | | | |
| c: Percent of facilities where IRS applied annually | | | | | | | |

## Map of included facilities (final)

if (!exists( "mvip.boundaries.interventions" ) ) mvip.boundaries.interventions = readRDS( paste0( params$data.dir, 'mvip.boundaries.interventions.rds' ) )

if (!exists( "mvip.facilities" ) ) mvip.facilities = readRDS( paste0( params$data.dir, 'mvip.facilities.rds' ) )

# note that some coordinates are outside MVIP, probably because of data entry error
boundaryBox = mvip.boundaries.interventions %>% st_bbox()

included.facilities = mvip.facilities %>%
 mutate( included = ifelse( orgUnit %in% consistently_reporting_evaluation_facilities, 'Included', 'Excluded' ))


ggplot() +
 geom_sf( data = mvip.boundaries.interventions, aes( fill = Intervention) ) +
 geom_sf( data = included.facilities %>% filter( included == "Excluded" ) ,
 color = 'black' , size = 1 , shape = 21 , aes( fill = Intervention ) ) +

 geom_sf( data = included.facilities %>% filter( included == "Included" ),
 color = 'red' , size = 1 , shape = 21 , aes( fill = Intervention ) ) +
 coord_sf(
 xlim = c( boundaryBox[1], boundaryBox[3]),
 ylim = c(boundaryBox[2], boundaryBox[4] ),
 expand = FALSE
 ) +
 theme_map( ) +
 theme( legend.position= "right",
 legend.title = element_text( face = 'bold') ) +
 scale_fill_manual(
 labels = c("Comparison", "Implementing", "Non-MVIP"),
 values = c( "lightgreen", "lightblue", "gray95") )


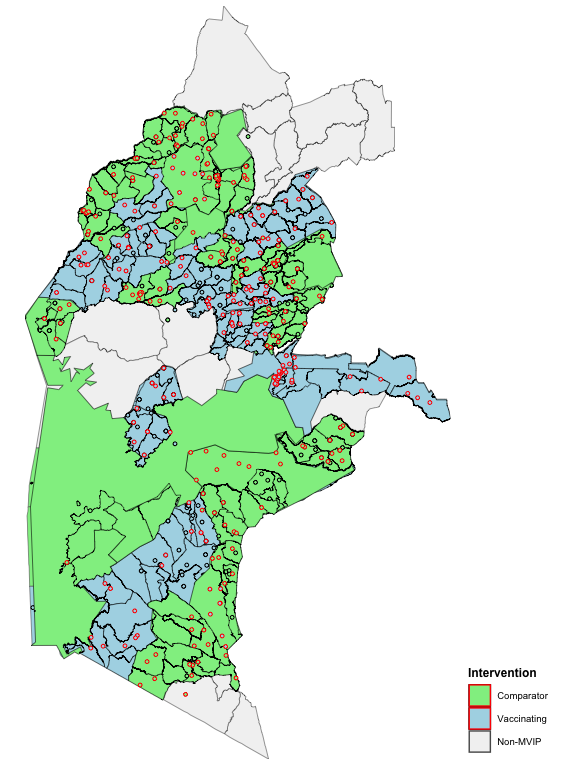


##

# Supplement H: Time-series models of uncomplicated cases to estimate vaccine impact

## Analyses

Load dataset (details available in online appendix [Section 7.1.2](#sec-prep-clinical-cases-dataset)

#### mcc5.total

dataset is mcc5.total. Values that were flagged as outliers by the mad10 algorithm (very large values) were converted to missing.

| Intervention | Facilities |
| --- | --- |
| Comparison | 139 |
| Implementing | 132 |

#### Plots of raw data analysis: Naive analysis

`mutate_if()` ignored the following grouping variables:
• Column `Intervention`

| 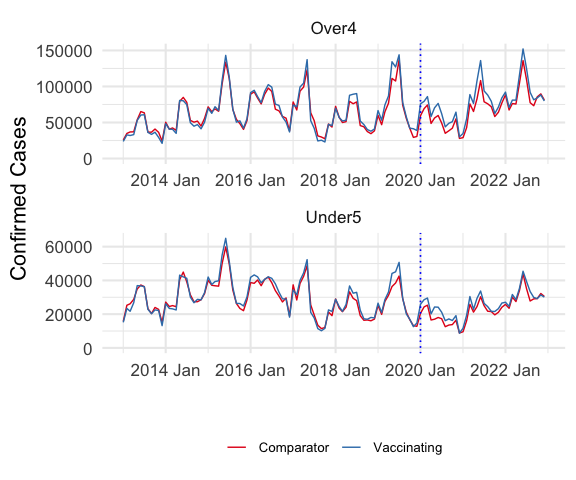  **Figure** 17**.S** Confirmed malaria cases reported among children Under5 by combined outpatient and community health worker (raw data) |
| --- |

Saving 6 x 5 in image

`mutate_if()` ignored the following grouping variables:
• Column `Intervention`


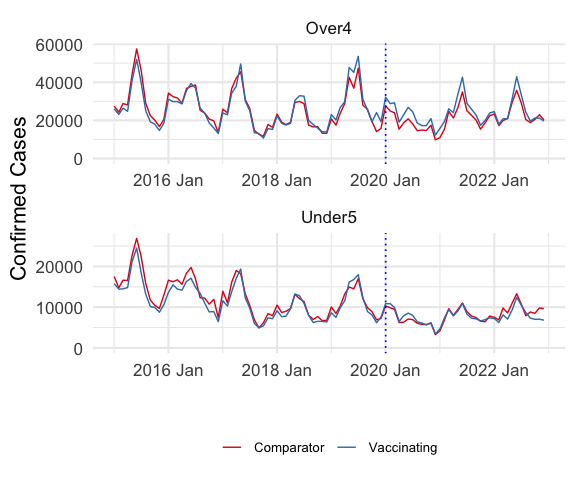


Confirmed malaria cases reported among children Under5 by combined outpatient and community health worker (consistently reporting facilities; potential outliers removed)

Saving 6 x 5 in image

### Exploratory non-time-series analyses

`mutate_if()` ignored the following grouping variables:
• Column `Intervention`


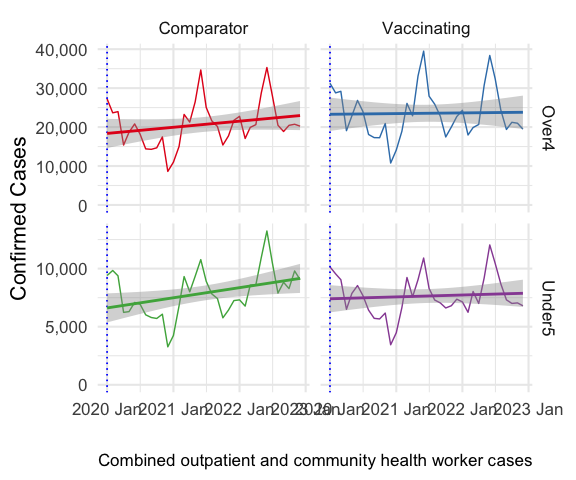


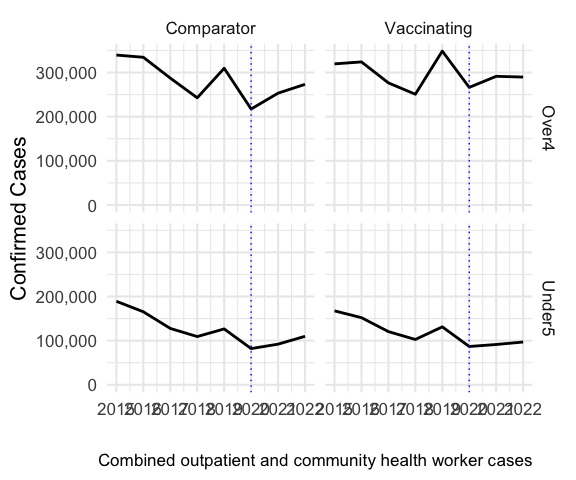


#### Time-series analysis

RTSS - Fable with agegrp controls ( by MVIP, controlling for agegrp )

- IRS districts NOT removed…

Create fable from mcc5.aci.mad10 dataset, then divide dataset into pre and post vaccine periods. For pre-vaccine period, perform time-series cross validation.[[11](#ref-5.8eval),[12](#ref-5.10tim)]

TODO: Explain having separate col for age group to use as covariate

## Time-Periods

TODO: Chart showing the periods.. - lock in start data based on consistently reporting

#|fig-cap: "Number of facilities consistently reporting (minimum 11 of 12 months) confirmed cases each year"

dataset.consisency( mcc5 )


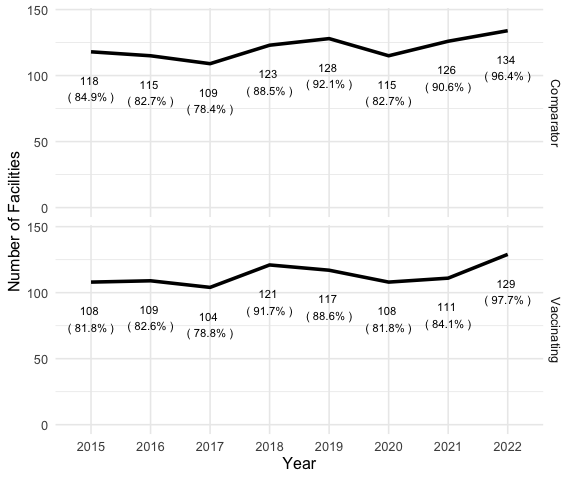


# ggsave( paste0( params$image.dir ,'adjusted(mcc5).consistency.png' ), dpi = 300 , width = 6)

fc = facility_characteristics( mcc5, vx )

saveRDS( fc , paste0( params$output , 'adjustedCharacteristics.rds' ) )

#|tbl-cap: Characteristics of adjusted dataset

ft_characteristics( fc )

| **Intervention** | **selected** | **Facilities** | **MOHa** | **<5y Malaria(%)** | **RTS,S Doses(%)** | **PBO-netsb** | **IRSc** |
| --- | --- | --- | --- | --- | --- | --- | --- |
| Comparison |  | 781 | 56.1% | 2,599,576 (48.2%) | 0 (0.0%) | 43.7% | 38.2% |
| Implementing |  | 747 | 57.3% | 2,796,140 (51.8%) | 928,646 (100.0%) | 33.8% | 23.9% |
| a: Percent of facilities owned by Ministry of Health. Other facilities owned by 'Private', 'Mission/Faith-Based Organization', or 'Non-Governmental Organization'. Owner was not incidated for 24.8% of facilities | | | | | | | |
| b: Percent of facilities where PBO nets distributed during mass campaign in 2021 | | | | | | | |
| c: Percent of facilities where IRS applied annually | | | | | | | |

## Time-Series Models (Mables)

- TODO describe primary models

(Note: The term “mable” comes from the authors of the Forecasting: Principles and Practice.[[13](#ref-hyndmana)])

Pre-intervention time-series models (mables) and cross-validation selection

- Time-series model[[14](#ref-5.1ati)] (mable), including ensemble prediction[[15](#X8b496cfbffa92ce65839840ccd2fc645591e018)] for all permutations of the ARIMA, ETS, and NNETAR models.
- TODO log transformation.

For prophet model (cite fable.prophet), the seasonal component has a parameters:

order: The number of terms in the partial Fourier sum. The higher the order, the more flexible the seasonality can be. (1 is least - more prone to under fitting, and 8 is most - more likely to overfit )

type: The nature of the seasonality. If “additive”, the variability in the seasonal pattern is fixed. If “multiplicative”, the seasonal pattern varies proportionally to the level of the series.

## Validation

To test the validity of each model we compare the predicted values with the actual values during the calendar year 2019. The predicted values are generated as a ‘fable’[[16](#ref-5.1atia)] from each model. The fables are created from the mables using the known values for confirmed cases in persons 5 and older during the calendar year 2019.

To assess the models accuracy for forecasting, it is important to use a metric that evaluates the accuracy of a forecast. A general process for validating models, commonly used in machine learning, involves fitting a number of models with different characteristics to a training dataset and then testing them on a validation set.[[17](#ref-hewamalage)] If the accuracy were to have been determined based on the goodness of fit with the training data, it is very likely the data will be overfit and not do well when forecasting values not in the training set. Therefore, it is good practice to reserve data from the training set that can be used to see how well the model predicts the missing values.

To assess the models forecast accuracy, it is important to use a metric that evalueates the accuracy of a forecast. Metrics like the mean absolute percent error (MAPE) [[18](#X5c42bfffb73dfa3057d3737e9392d28a6bbde27)] penalizes the forecast for error above and below the actual value. The MAPE has limitations[[19](#ref-kolassa2017),[20](#ref-kolassaWhyBestPoint2020)] however, and many other metrics have been proposed.[[17](#ref-hewamalage)]

In this application, the RMSE is chosen to validate the models because the model fitting functions themselves (e.g. ARIMA) use the RMSE to optimize their paramaters, and therefore we also use RMSE to select the best fit.[[21](#ref-kolassa2021)]

The percentage error is usually defined as in : $ = _{i=1}^{n} y_i $., where et is the scale-dependent error, yt is the actual value, and at the tth time step.

pt = 100et (15) yt Examples of percentage errors are as follows.

WAPE:

### Model classes

Parameters for each primary model were selected with each package’s auto-fitting method. The reported number over-5 malaria cases were included as a covariate in each model except ETS, which does not allow covariates. Values for the dependent variable, under-5 cases, were log-transformed to stablilize variance and ensure that predicted values were non-negative. For ARIMA models, the exogenous regressor was also log-transformed to prevent undefined predicted values. No undefined values were generated by other models and the model fit was improved with an untransformed regressor.

Note: The exogenous variable, older, was log-transformed for the ARIMA model because models with the untransformed variable yielded an error message, “Warning in sqrt(diag(best$var.coef)) : NaNs produced”, which indicates model instability. None of the other models produced a warning and the results showed improved model fit (slightly smaller SWAPE) when untransformed.

- TODO: describe 3 potential validation methods: 1. In-sample 2. OOS 12-month 3. OOS CV (3-months ahead)

### 1. In-sample performance

| Intervention | .model | .type | ME | RMSE | MAE | MPE | MAPE | MASE | RMSSE | ACF1 | rank |
| --- | --- | --- | --- | --- | --- | --- | --- | --- | --- | --- | --- |
| Comparison | p8 | Training | 2.3200 | 719 | 554 | -0.2060 | 4.90 | 0.2170 | 0.2190 | 0.2450 | 1 |
| Comparison | a | Training | -35.6000 | 800 | 643 | -0.2280 | 5.90 | 0.2520 | 0.2430 | -0.0205 | 2 |
| Comparison | n | Training | 40.8000 | 826 | 673 | -0.3020 | 6.23 | 0.2640 | 0.2510 | 0.3510 | 3 |
| Comparison | p4 | Training | 5.3400 | 867 | 686 | -0.3000 | 6.11 | 0.2690 | 0.2640 | -0.0549 | 4 |
| Comparison | p1 | Training | 6.2000 | 877 | 697 | -0.3270 | 6.25 | 0.2730 | 0.2670 | 0.0166 | 5 |
| Comparison | t | Training | 11.7000 | 941 | 733 | -0.3740 | 6.52 | 0.2870 | 0.2870 | 0.2570 | 6 |
| Comparison | e | Training | -48.4000 | 1,500 | 1,130 | -1.5100 | 10.00 | 0.4450 | 0.4550 | 0.1070 | 7 |
| Implementing | n | Training | 19.6000 | 320 | 216 | -0.0047 | 1.87 | 0.0818 | 0.0953 | -0.0452 | 1 |
| Implementing | p8 | Training | -3.7500 | 968 | 648 | -0.2800 | 5.64 | 0.2450 | 0.2880 | 0.4280 | 2 |
| Implementing | a | Training | -70.9000 | 914 | 651 | -0.5690 | 5.64 | 0.2460 | 0.2720 | 0.1340 | 3 |
| Implementing | t | Training | 0.0973 | 1,060 | 739 | -0.3930 | 6.71 | 0.2800 | 0.3140 | 0.3000 | 4 |
| Implementing | p4 | Training | -0.3940 | 1,030 | 759 | -0.3440 | 6.67 | 0.2870 | 0.3080 | 0.2250 | 5 |
| Implementing | p1 | Training | 3.6500 | 1,140 | 806 | -0.4040 | 7.13 | 0.3050 | 0.3390 | 0.2520 | 6 |
| Implementing | e | Training | -85.2000 | 1,610 | 1,220 | -1.9100 | 11.00 | 0.4620 | 0.4800 | 0.1380 | 7 |

The best-fitting models using in-sample validation are:

| Intervention | .model | .type | ME | RMSE | MAE | MPE | MAPE | MASE | RMSSE | ACF1 | Intervention Rank | percent_diff | mean |
| --- | --- | --- | --- | --- | --- | --- | --- | --- | --- | --- | --- | --- | --- |
| Comparison | p8 | Training | 2.324 | 718.601 | 554.396 | -0.206 | 4.904 | 0.217 | 0.219 | 0.245 | 1 | 0 | 0.2312967 |
| Implementing | n | Training | 19.648 | 320.085 | 216.015 | -0.005 | 1.867 | 0.082 | 0.095 | -0.045 | 1 | 0 | 0.1727968 |

However, in-sample validation is prone to selecting models that over-fit the data and that do not do well when predicting new data. Therefore, we prefer out-of sample (OOS) validation, where values are removed from the training set and the model is evaluated on the ability to predict those missing values.

### 2. OOS Training and Testing

- compute out-of-sample accuracy (fabletools:accuracy. See https://stackoverflow.com/questions/58902600/only-nans-in-accuracy-table-in-forecasts-using-fable-package for example usage)

Note: The exogenous variable, older, was log-transformed for the ARIMA model because models with the untransformed variable yielded an error message, “Warning in sqrt(diag(best$var.coef)) : NaNs produced”, which indicates model instability. None of the other models produced a warning and the results showed improved model fit (slightly smaller SWAPE) when untransformed.

- In-sample accuracy of training set
- TODO: compare with accuracy of complete set [above] and test set [below] – in-sample MASE worse with models trained on less data
- Top 10 models for each Intervention. Models ranked by MAPE (smallest is best)
- Accuracy of 12-month forecast from training set compared with 12-month test data, using SWAPE.

| Intervention | .model | swape | Intervention Rank | percent_diff | mean |
| --- | --- | --- | --- | --- | --- |
| Comparison | an | 7.383 | 1 | 0.0 | 7.520055 |
| Comparison | ant | 7.476 | 2 | 1.3 | 7.063058 |
| Comparison | at | 8.395 | 3 | 13.7 | 8.396559 |
| Comparison | p8 | 8.951 | 4 | 21.2 | 9.230729 |
| Comparison | nt | 9.524 | 5 | 29.0 | 8.067032 |
| Comparison | n | 9.667 | 6 | 30.9 | 9.686032 |
| Comparison | p4 | 11.142 | 7 | 50.9 | 10.646817 |
| Comparison | p1 | 11.425 | 8 | 54.7 | 10.646514 |
| Comparison | a | 11.672 | 9 | 58.1 | 11.181656 |
| Comparison | aent | 13.057 | 10 | 76.9 | 14.704455 |
| Implementing | nt | 6.610 | 1 | 0.0 | 8.067032 |
| Implementing | ant | 6.650 | 2 | 0.6 | 7.063058 |
| Implementing | an | 7.657 | 3 | 15.8 | 7.520055 |
| Implementing | at | 8.398 | 4 | 27.0 | 8.396559 |
| Implementing | p8 | 9.511 | 5 | 43.9 | 9.230729 |
| Implementing | n | 9.706 | 6 | 46.8 | 9.686032 |
| Implementing | p1 | 9.868 | 7 | 49.3 | 10.646514 |
| Implementing | p4 | 10.151 | 8 | 53.6 | 10.646817 |
| Implementing | a | 10.691 | 9 | 61.7 | 11.181656 |
| Implementing | t | 13.706 | 10 | 107.4 | 13.693355 |

For the comparison group, the *ant* model has least SWAPE with next closest model 19% greater. For Implementing group, the *aent* model has the least SWAPE, but several other models are closing, includeing *ant* (+3.6%). Not only does the *ant* model have a small mean SWAPE, the variance is also one of the smallest.

`stat_bin()` using `bins = 30`. Pick better value with `binwidth`.


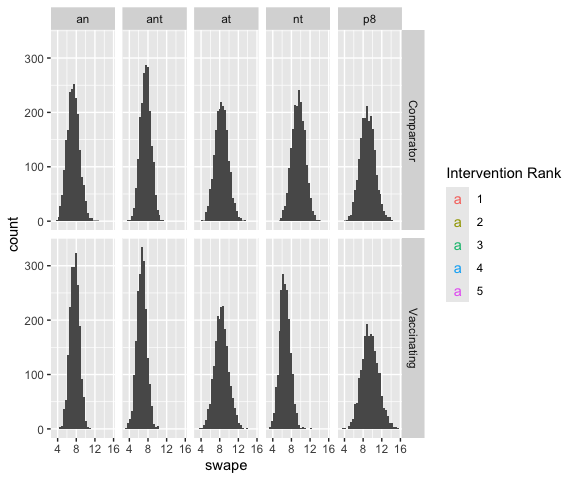


- check differences in accuracy distributions between models


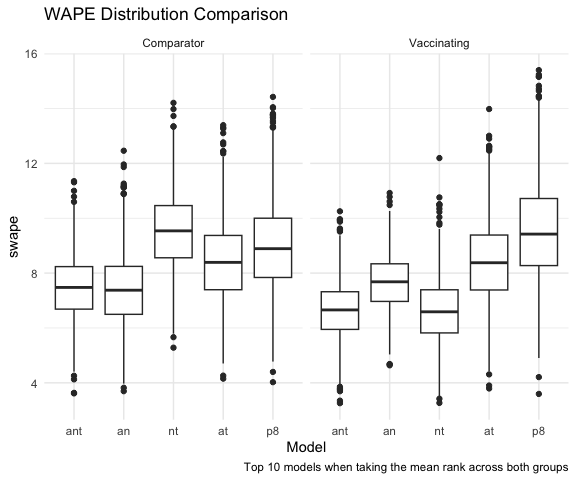


### Cross-Validation[[12](#ref-5.10tim)]

- Not run (code included for demonstration)
- Forecasts with cv-test (1-3-months ahead)
- In-sample accuracy, for comparison with OOS test accuracy (not run)
- OOS CV-Test accuracy

## Validation Algorithm: Optimizing versus Synchronizing

As shown in proceeding steps, the method used for model-selection may significantly affect the counterfactual prediction used that are the basis for estimating the intervention’s (RTSS) impact. In this setting, we have two groups (Comparison and Implementing) with distinct time-series. When predicting a time series containing multiple groups, the decision on whether to use the same model type for all groups (synchronize) or to select the best model for each group independently (optimize) is an important consideration. This topic is discussed in various academic publications, although (to our knowledge) does not directly address the situation with two study groups having been chosen for similar characteristics. The literature we reviewed suggests that model selection should generally be based on the best model validation for each group (optimize), especially when the groups have different characteristics. However, practical considerations like consistency and coherence may justify selecting the same model (synchronize).

The predictive models used here have different methods for discovering and projecting underlying trend and seasonal components. Thus it is possible that, given similar data, one model class (e.g. arima, neural network, etc.) may systematically bias the projection relative to another model type. Thus, there is the potential that the difference seen between the two groups could be do to the model type, rather than then intervention. Therefore, we propose the following heuristic(?) for model selection:

1. When possible, use the same model class for each group in a given time period.
   - When the time-period changes (say going from pre-intervention to post-intervention), the model selection may also change and the preference is to use the same model for each group, even if it is different from the model class used with a different time period.
2. Model selection should be based on out of sample (OOS) validation, which is less likely to be overfit. A model that overfits the training data captures noise and random fluctuations in the training set. Consequently, it fails to generalize well to new, unseen data, leading to poor predictive performance in real-world scenarios. Therefore we suggest using training and test sets where the test set is the most recent data in the time-series.
   - Because malaria data has strong yearly seasonality so the test set should include an entire year.
3. Model fitting should include both primary model classes (arima, etc.) and all combinations of those models to create ensemble models.
   - The default should be to create equally weighted ensemble models. In other words, an ensemble model created from arima and ETS models would be a simple average of the two.
4. The most-reliable point-estimate of goodness of fit is the symmetric weighted absolute percent error (SWAPE).
   - The point estimate is the mean SWAPE across all iterations of predicted months in the test period.
   - The models should be ranked from lowest SWAPE (rank 1) to highest SWAPE for each group and should include the standard error of the mean
5. In the event that validation suggest different model classes for each group:
   1. Compare the model mean and standard error to see which models are likely not significantly different (e.g. confidence intervals do not overlap)
   2. If there are more than one model shared by each group, choose the model with the lowest combined mean SWAPE.
   3. If there is no common model class with the initial test-period (e.g. 12-month forecast), try using a cross-validation method to see if that yields a consistent model.
   4. If the top ranked models are significantly different between the two groups, this suggests there is some fundamental difference between them and that model selection should be different for each group (optimize).

## Model Selection - Pre-intervention

We selected the ensemble model **ant** (an equally weighted average of predictions from the ARIMA, NEURALNET, and TSLM models) as the best model because it the lowest mean SWAPE.

| Intervention | .model | rank |
| --- | --- | --- |
| Comparison | ant | 1 |
| Implementing | ant | 1 |
| Comparison | an | 2 |
| Implementing | an | 2 |
| Comparison | a | 5 |
| Implementing | a | 6 |
| Comparison | p8 | 81 |
| Implementing | p8 | 105 |

## Impact

### cumulative

Impact relative to 3-year forecast. After validating the model, we re-run the model including all the data prior to the intervention period (Jan 2020-Dec 2022). Note that there is no easy way to write the model specifications for only the ones selected in the validation step. So we run all the models, forecast the data, and then select only the forecast that match the validation models. The functions forecast_impact, impact_summary, and impact_difference are carry out these steps.

The impact was calculated as the weighted percent difference (WPE), which we defined as the percent difference relative to the foretasted value:

### YEAR 1 Post-Intervention

#### 12-month forecast

Model all preintervention data then select forecast from the validation set.

Note: we are removing the prophet models (p1,p4,p8), which are not in the selected model, to speed up calculations. When re-modeling the data we will reintroduce the models. (see sections on evaluation of year1 and year2 with 12-month forecasts)

26.643 sec elapsed

`mutate_if()` ignored the following grouping variables:
• Columns `Intervention`, `.model`, `Month`


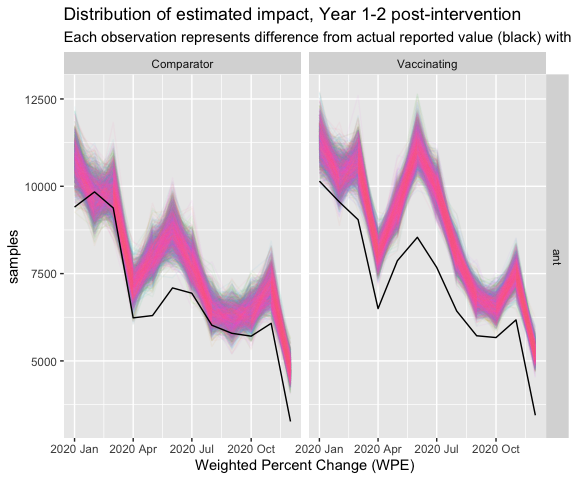


- Summarise across all replicates

| .model | Intervention | | | WPE.mean | | | WPE.sd | | |
| --- | --- | --- | --- | --- | --- | --- | --- | --- | --- |
| ant | Comparison | | | -11.57865 | | | 1.2405809 | | |
| ant | Implementing | | | -17.20387 | | | 0.9486557 | | |
| Intervention | | .model | mean | | sd | median | | n | rank |
| Comparison | | ant | -11.6 | | 1.240 | -11.6 | | 2,000 | 1 |
| Implementing | | ant | -17.2 | | 0.949 | -17.2 | | 2,000 | 1 |

# A tibble: 7 × 2
 Threshold `Probability less than`
 <dbl> <dbl>
1 0 1
2 -5 0.644
3 -10 0.0035
4 -15 0
5 -20 0
6 -25 0
7 -30 0

| 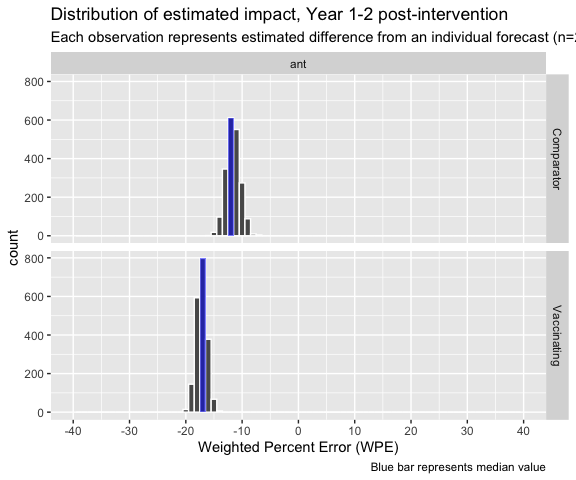  **Figure** 18**.S** Estimated difference between predicted and actual number of cases during first 12-months post vaccination, by intervention. |
| --- |

- probabilities associated with distribution

| Evaluation Period | n | mean | sd | median | hdi_lower | hdi_upper |
| --- | --- | --- | --- | --- | --- | --- |
| 1-12 months | 2,000 | -5.63 | 1.6 | -5.57 | -8.93 | -2.7 |

| 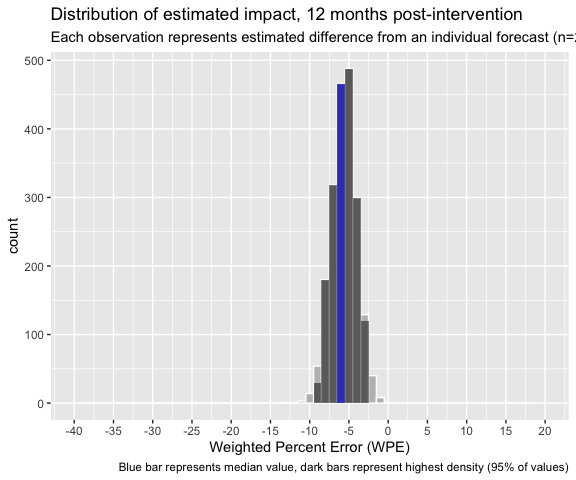  **Figure** 19**.S** Estimated impact during first 12-months post vaccination. |
| --- |

##### minimum_detectable_difference

Assume distribution of 2 groups are same as those observed.

[1] -3 3

### YEAR 2 Post-Intervention

#### 24-month forecast

- Use the same primary models as in year 1 (combo.forecasts.yr1) but create new forecasts for 24 months (year1 and year2)

45.017 sec elapsed

`mutate_if()` ignored the following grouping variables:
• Columns `Intervention`, `.model`, `Month`


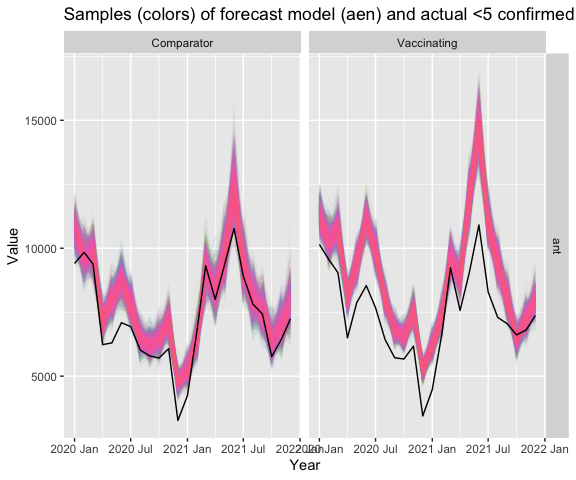


- Summarise across all replicates

| Intervention | WPE.mean | WPE.sd |
| --- | --- | --- |
| Comparison | -8.323414 | 1.1080380 |
| Implementing | -16.561397 | 0.7208192 |

| 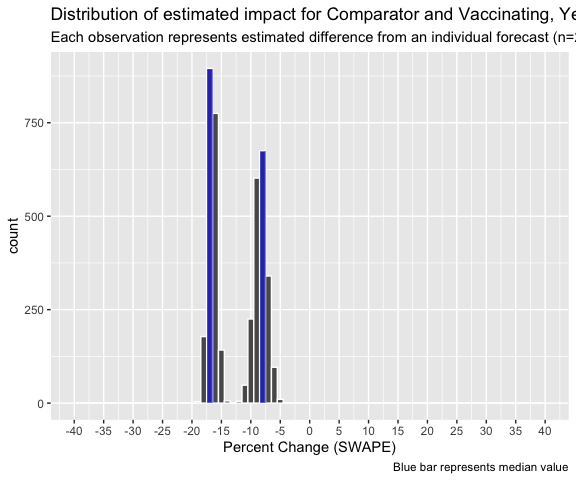  **Figure** 20**.S** Estimated difference between predicted and actual number of cases during 24-months post vaccination, by intervention. |
| --- |

| Evaluation Period | n | mean | sd | median | hdi_lower | hdi_upper |
| --- | --- | --- | --- | --- | --- | --- |
| 1-24 months | 2,000 | -8.24 | 1.31 | -8.23 | -10.73 | -5.78 |


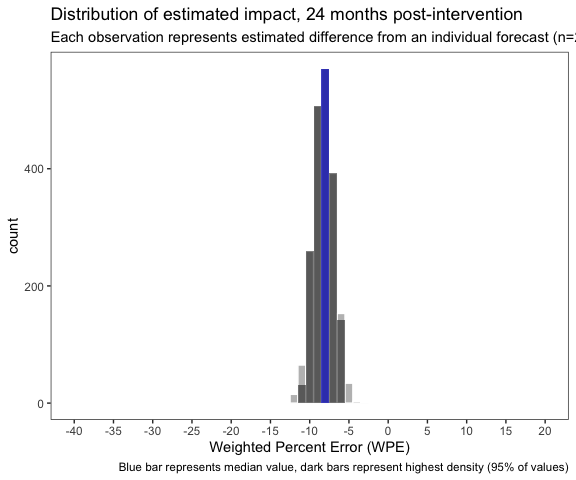


# A tibble: 5 × 2
 Threshold `Probability less than`
 <dbl> <dbl>
1 0 1
2 -5 0.994
3 -10 0.0905
4 -15 0
5 -20 0

##### minimum_detectable_difference

Assume distribution of 2 groups are same as those observed.

[1] -2.5 2.5

### YEAR 3 Post-Intervention

#### 36-month forecast

- Use the same primary models as in year 1 (combo.forecasts.yr1) but create new forecasts for 36 months (year1, year2, and year3)

64.27 sec elapsed

`mutate_if()` ignored the following grouping variables:
• Columns `Intervention`, `.model`, `Month`


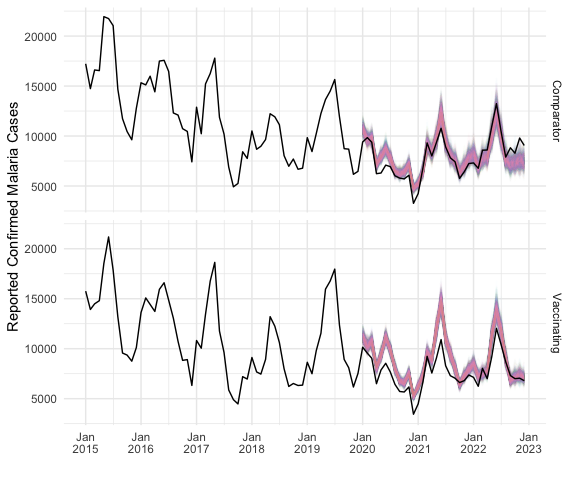


Saving 6.5 x 5 in image

- Calculate WPE for each replicate
- Summarise across all replicates

| Intervention | WPE.mean | WPE.sd |
| --- | --- | --- |
| Comparison | -2.214097 | 1.0852044 |
| Implementing | -13.783103 | 0.6581507 |


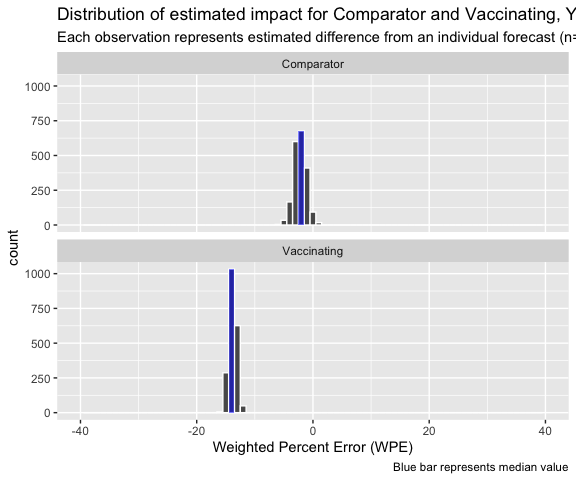


| Evaluation Period | n | mean | sd | median | hdi_lower | hdi_upper |
| --- | --- | --- | --- | --- | --- | --- |
| 1-36 months | 2,000 | -11.57 | 1.27 | -11.57 | -14.2 | -9.19 |


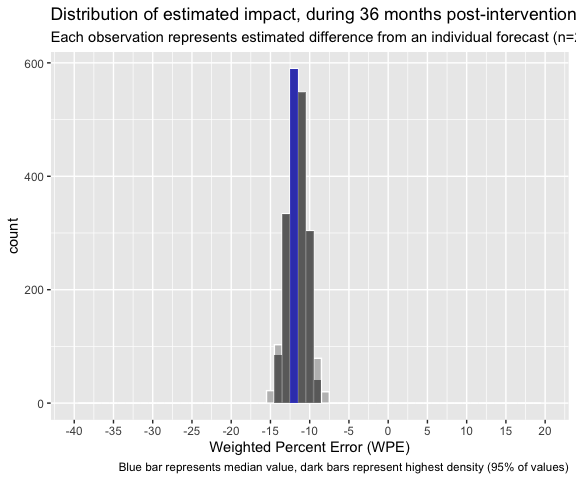


| Threshold | Probability less than |
| --- | --- |
| 0 | 1.0000 |
| -5 | 1.0000 |
| -10 | 0.8915 |
| -15 | 0.0035 |
| -20 | 0.0000 |

##### minimum_detectable_difference

Assume distribution of 2 groups are same as those observed.

[1] -40.0 -2.1

## Grand Summary

| Evaluation Period | n | mean | sd | median | hdi_lower | hdi_upper |
| --- | --- | --- | --- | --- | --- | --- |
| 1-12 months | 2,000 | -5.63 | 1.60 | -5.57 | -8.93 | -2.70 |
| 1-24 months | 2,000 | -8.24 | 1.31 | -8.23 | -10.73 | -5.78 |
| 1-36 months | 2,000 | -11.57 | 1.27 | -11.57 | -14.20 | -9.19 |

# Supplement I: Impact of distance from comparison to implementing facilities

## Distance-dose response

### Shortest distance from comparison facility to a implementing facility included in analytic dataset (mcc5)

- The implementing and comparison areas are practically and adjacent and there are many comparison facilities that are very close (3-10km) to the Implementing facilities. We may consider censoring those facilities because of the risk that children attending those facilities were vaccinated.

We start by including only those facilities in the analytic dataset (mcc5).

# MVIP cases associated with consistently reporting
if (!exists( "mcc4" ) ) mcc4 = readRDS( paste0( params$output , 'mcc4.rds' ) )
if (!exists( "mcc5" ) ) mcc5 = readRDS( paste0( params$output , 'mcc5.rds' ) )

# reported vaccinations
if (!exists( "vx" ) ) vx = readRDS( paste0( params$data.dir, 'vx.rds' ))

if (!exists( "mvip.boundaries.interventions" ) ) mvip.boundaries.interventions = readRDS( paste0( params$data.dir, 'mvip.boundaries.interventions.rds' ) )
# note that some coordinates are outside MVIP, probably because of data entry error
boundaryBox = mvip.boundaries.interventions %>% st_bbox()

if (!exists( "mvip.facilities" ) ) mvip.facilities = readRDS( paste0( params$data.dir, 'mvip.facilities.rds' ) )

if (!exists( 'base_map') ) base_map = read_rds( paste0( params$data.dir , 'base_map.rds' ))

# mvip.facilities is created in supplement MVIP_Facilities
# consistently_reporting_facilities is created in supplement MVIP_Reporting_Consistency
included.facilities = mvip.facilities %>%
 filter( orgUnit %in% unique( mcc5$orgUnit ) )

Create separate list of implementing and comparison facilities.

Calculate distances between each comparison and all implementing facilities and then select the shortest distance for each comparison facility.

# define threshold for close buffer area (in KM)
close = 5 # in kilometers


nearest_vx_distance.mcc5 = compFacilities_to_nearest_vxFacilities.mcc5 %>%
 st_sf %>% mutate(
 orgUnit = compFacilities.mcc5 %>%
 filter( !st_is_empty(compFacilities.mcc5) ) %>%
 pull( orgUnit ) ,
 distance = st_length(compFacilities_to_nearest_vxFacilities.mcc5) ,
 nearest_vx_km = round( distance / 1000 , 0 ) %>% as.numeric() ,
 proximity = ifelse( nearest_vx_km <= close , 'near' , 'far' ) )

save(vxFacilities.all, compFacilities.mcc5 , compFacilities_to_nearest_vxFacilities.mcc5,
 nearest_vx_distance.mcc5 ,
 file = paste0(params$output, "compFacilities_to_nearest_vxFacilities.rda"))


nearest_vx_distance.mcc5 %>%
 st_drop_geometry() %>%
 count( proximity , nearest_vx_km ) %>%
 ggplot() +
 geom_col( aes( nearest_vx_km, n, fill = proximity )) +
 scale_fill_manual( values = c( near = 'purple' , far = 'red4' ) ) +
 scale_x_continuous( limits = c(0, 50 )) +
 labs( caption = "Kenya MVIP: analytic dataset" , x = "Kilometers", y = 'Facilities' ) +
 theme_bw()

ggsave( paste0(params$image.dir, "nearest_vx_distance.mcc5.png") , dpi = 300 )

Saving 6 x 5 in image

| 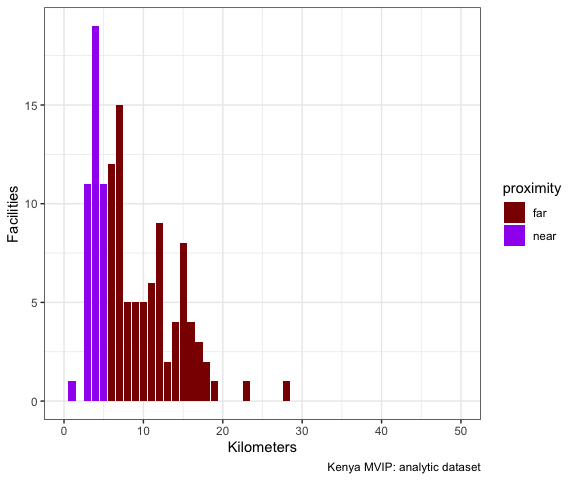  **Figure** 21**.S** Distance (Km) from comparison facility to nearest implementing facility |
| --- |

We set 5km as the cutoff between facilities that are near to a implementing facility and those that are far from a implementing facility.

nearest_vx_distance.mcc5 %>%
 as_tibble %>%
 count( proximity ) %>%
 add_prop() %>% select( proximity ,n , prop_label ) %>%
 rename( Percentage = prop_label ) %>%
 flextable()

| proximity | n | Percentage |
| --- | --- | --- |
| far | 83 | 65.9% |
| near | 43 | 34.1% |

base_map +

 geom_sf( data = vxFacilities.all ,
 # color = 'red' ,
 alpha = .5 , size = .5 , shape = 21 ,
 aes( fill = Intervention, level == 5 ) ) +
 geom_sf( data = nearest_vx_distance.mcc5 ,
 aes( color = proximity , size = proximity ) ) +
 geom_sf( data = compFacilities.mcc5 ,
 # color = 'blue' ,
 size = 1 , shape = 21 ,
 aes( fill = Intervention ) ) +
 scale_size_identity() +
 scale_color_manual( "Distance from comparison facility\nto nearest implementing facility" ,
 labels = c("near", "far" ),
 values = c( 'near' = "purple", 'far' = "red4") ) +
 # scale_size_manual(
 # labels = c("near", "far" ),
 # values = c( 'near' = 10, 'far' = 1) ) +
 #
 # geom_sf( data = mcc6.facilities %>% filter( included == "Included" ) ,
 # color = 'red' , size = 1 , shape = 21 , aes( fill = Intervention ) ) +

 coord_sf(
 xlim = c( boundaryBox[1], boundaryBox[3]),
 ylim = c(boundaryBox[2], boundaryBox[4] ),
 expand = FALSE
 )

Coordinate system already present. Adding new coordinate system, which will
replace the existing one.


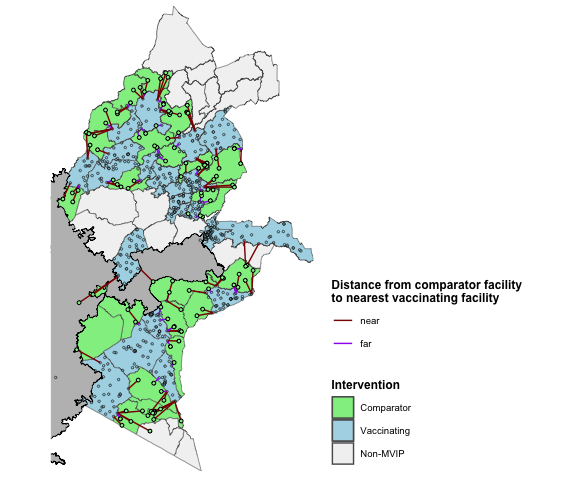


Geolocation was unavailable for 291 of the 840 implementing facilities and 13 of the 139 comparison facilities included in analysis based on having consistently reported confirmed cases.

### Compare impact in comparison areas (mcc5)

### Compare impact in comparison areas (mcc4)

Same as above but including all facilities (mcc4 dataset) to increase the number of facilities and see if association of proximity with impact still holds.

nearest_vx_distance.mcc4 %>%
 as_tibble %>%
 count( proximity ) %>%
 add_prop() %>% select( proximity ,n , prop_label ) %>%
 rename( Percentage = prop_label ) %>%
 flextable()

base_map +

 geom_sf( data = vxFacilities.all ,
 # color = 'red' ,
 alpha = .5 , size = .5 , shape = 21 ,
 aes( fill = Intervention, level == 5 ) ) +
 geom_sf( data = nearest_vx_distance.mcc4 ,
 aes( color = proximity , size = proximity ) ) +
 geom_sf( data = compFacilities.mcc4 ,
 # color = 'blue' ,
 size = 1 , shape = 21 ,
 aes( fill = Intervention ) ) +
 scale_size_identity() +
 scale_color_manual( "Distance from comparison facility\nto nearest implementing facility" ,
 labels = c("near", "far" ),
 values = c( 'near' = "purple", 'far' = "red4") ) +
 # scale_size_manual(
 # labels = c("near", "far" ),
 # values = c( 'near' = 10, 'far' = 1) ) +
 #
 # geom_sf( data = mcc6.facilities %>% filter( included == "Included" ) ,
 # color = 'red' , size = 1 , shape = 21 , aes( fill = Intervention ) ) +

 coord_sf(
 xlim = c( boundaryBox[1], boundaryBox[3]),
 ylim = c(boundaryBox[2], boundaryBox[4] ),
 expand = FALSE
 )

### Impact: Implementing (mcc5) compared with **near** facilities

- Define data for impact evaluation: All implementing facilities and those comparison facilities within 5 km of a implementing facility.

near.facilities.mcc5 = nearest_vx_distance.mcc5 %>%
 filter( proximity %in% 'near' ) %>%
 pull( orgUnit )

fable.data.age.near.mcc5 = mcc5 %>%
 filter( Intervention %in% 'Implementing' | orgUnit %in% near.facilities.mcc5 )

`mutate_if()` ignored the following grouping variables:
• Columns `Intervention`, `.model`, `Month`


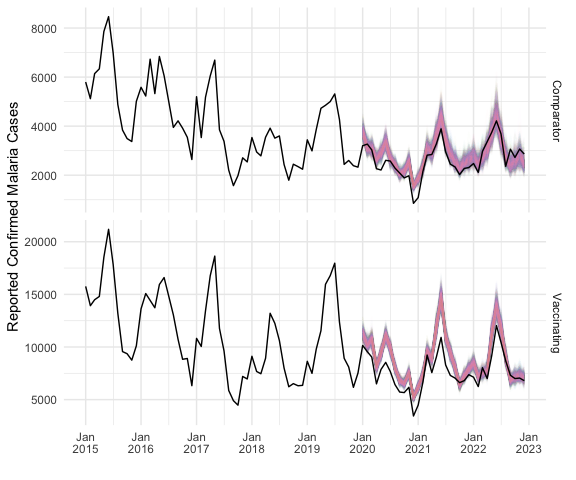


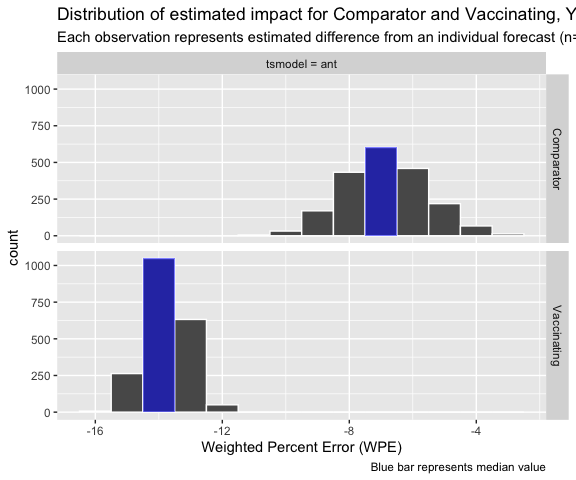


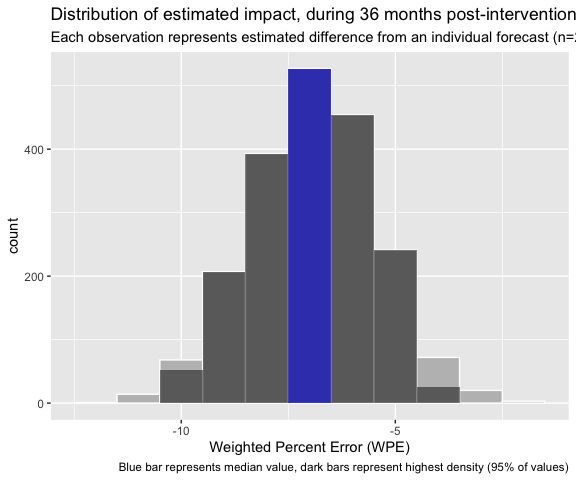


| Intervention | .model | n | mean | sd | median | hdi_lower | hdi_upper |
| --- | --- | --- | --- | --- | --- | --- | --- |
| Comparison | ant | 2,000 | -6.9 | 1.3 | -6.9 | -9.5 | -4.3 |
| Implementing | ant | 2,000 | -13.8 | 0.7 | -13.8 | -15.1 | -12.5 |
| Impact (1-36 months) | Implementing - Comparison | 2,000 | -6.9 | 1.5 | -6.9 | -10.0 | -4.3 |

### Impact: Implementing (mcc5) compared with **far** facilities

far.facilities.mcc5 = nearest_vx_distance.mcc5 %>%
 filter( proximity %in% 'far' ) %>%
 pull( orgUnit )

fable.data.age.far.mcc5 = mcc5 %>%
 filter( Intervention %in% 'Implementing' | orgUnit %in% far.facilities.mcc5 )

`mutate_if()` ignored the following grouping variables:
• Columns `Intervention`, `.model`, `Month`


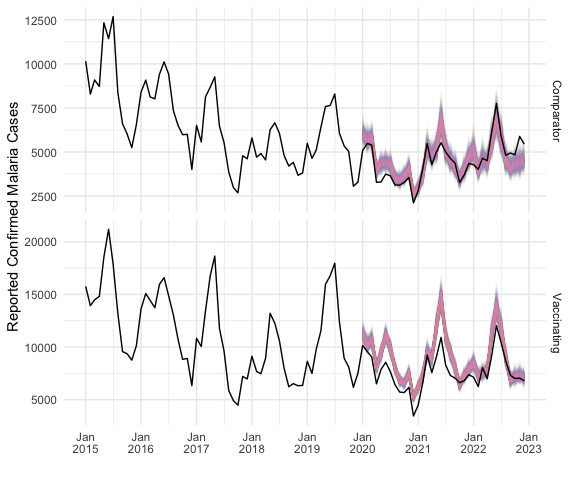


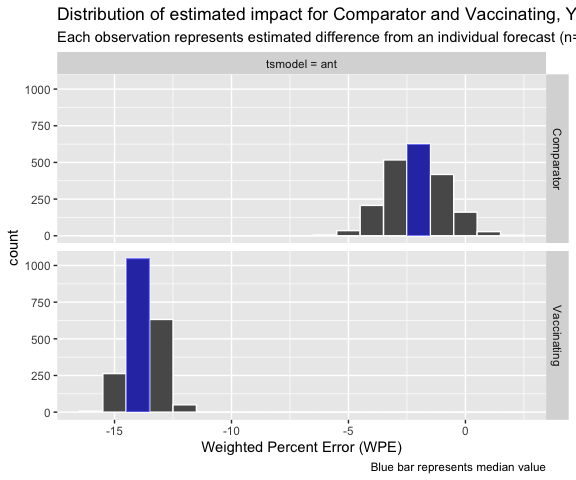


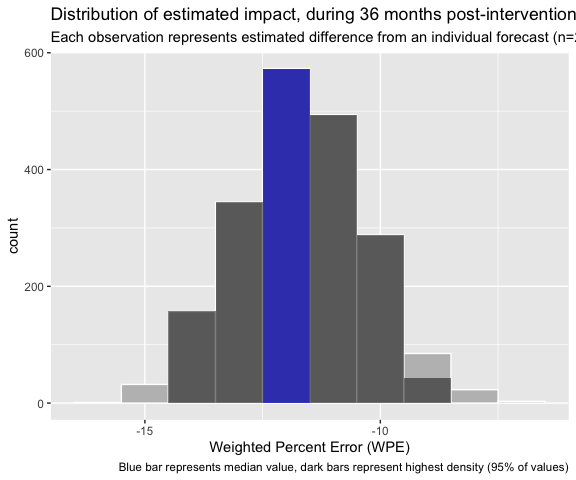


| Intervention | .model | n | mean | sd | median | hdi_lower | hdi_upper |
| --- | --- | --- | --- | --- | --- | --- | --- |
| Comparison | ant | 2,000 | -2.1 | 1.2 | -2.1 | -4.5 | 0.1 |
| Implementing | ant | 2,000 | -13.8 | 0.7 | -13.8 | -15.1 | -12.5 |
| Impact (1-36 months) | Implementing - Comparison | 2,000 | -11.7 | 1.4 | -11.6 | -14.5 | -9.2 |

### Contrast near vs far

- Histogram between impact using far comparison facilities and near comparison facilities.


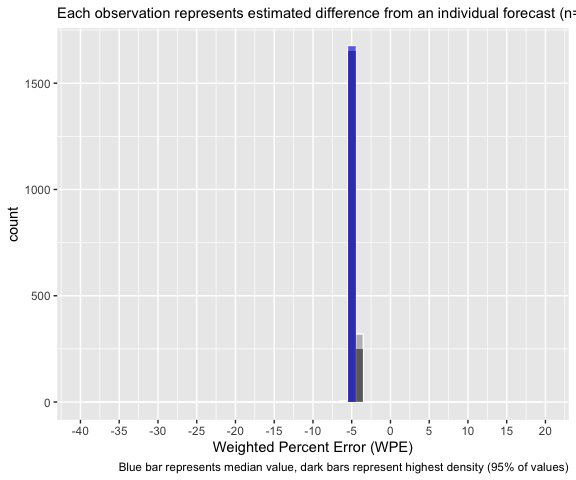


# Supplement J: Alternative Modeling Scenarios

# Alternative Data and Modelling Scenarios

##

## Data

if (!exists( "reporting_consistency" ) ) reporting_consistency = readRDS( paste0( params$output ,
 'reporting_consistency.rds' ))

start_month = yearmonth("Jan 2015")
allowable_missing = 1
consistently_reporting_facilities = reporting_consistency %>%
 filter( Starting == start_month &
 MissingPerYr == allowable_missing ) %>%
 pull( Facilities ) %>% unlist

# mcc0 - all MVIP (mvip clinical cases ) OPD and CHEW (raw data)
if (!exists( "mcc0" ) ) mcc0 = readRDS( paste0( params$output , 'mcc0.rds' ) )

# mcc1 - mcc0 data minus duplicate entries AND potential outliers
if (!exists( "mcc1" ) ) mcc1 = readRDS( paste0( params$output , 'mcc1.rds' ) )

# mcc2 - mcc1 with grouping variables for age and clinic type, minus CHEW-age unspecified, pre 2021
if (!exists( "mcc2" ) ) mcc2 = readRDS( paste0( params$output , 'mcc2.rds' ) )

# mcc3 - mcc2 with chew cases linked with opd
if (!exists( "mcc3" ) ) mcc3 = readRDS( paste0( params$output , 'mcc3.rds' ) )

# mcc4 -
if (!exists( "mcc4" ) ) mcc4 = readRDS( paste0( params$output , 'mcc4.rds' ) )

# mcc5
if (!exists( "mcc5" ) ) mcc5 = readRDS( paste0( params$output , 'mcc5.rds' ) )

# mcc3 restricted to consistently reporting facilities (adjusted data )
if (!exists( "mcc6" ) ) mcc6 = readRDS( paste0( params$output , 'mcc6.rds' ) )

# reported vaccinations
if (!exists( "vx" ) ) vx = readRDS( paste0( params$data, 'vx.rds' ))

if (!exists( "mvip.boundaries.interventions" ) ) mvip.boundaries.interventions = readRDS( paste0( params$data, 'mvip.boundaries.interventions.rds' ) )

if (!exists( "mvip.facilities" ) ) mvip.facilities = readRDS( paste0( params$data, 'mvip.facilities.rds' ) )

if (!exists( 'base_map') ) base_map = read_rds( paste0( params$output , 'base_map.rds' ))

## Raw data

dataset.consisency( mcc0 %>% mutate( total = original ) )


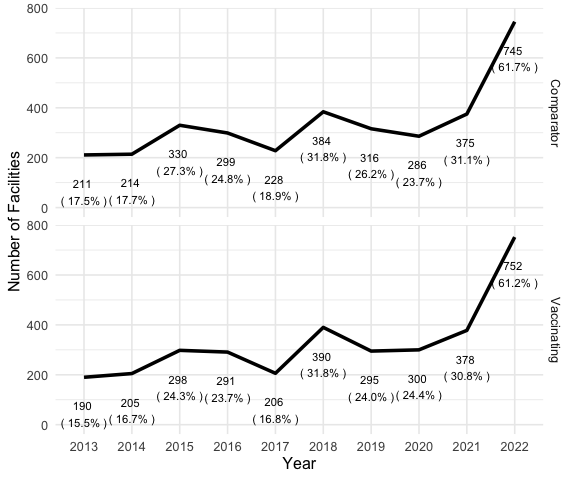


ggsave( paste0( params$image.dir , 'raw(mcc0).consistency.png' ), dpi = 300 , width = 6)

Saving 6 x 5 in image

# note that some coordinates are outside MVIP, probably because of data entry error
boundaryBox = mvip.boundaries.interventions %>% st_bbox()


base_map +

 geom_sf( data = mvip.facilities %>% filter( level == 5 ) ,
 color = 'grey' , size = 1 , shape = 21
 # , aes( fill = Intervention )
 ) +

 coord_sf(
 xlim = c( boundaryBox[1], boundaryBox[3]),
 ylim = c(boundaryBox[2], boundaryBox[4] ),
 expand = FALSE
 )

Coordinate system already present. Adding new coordinate system, which will
replace the existing one.


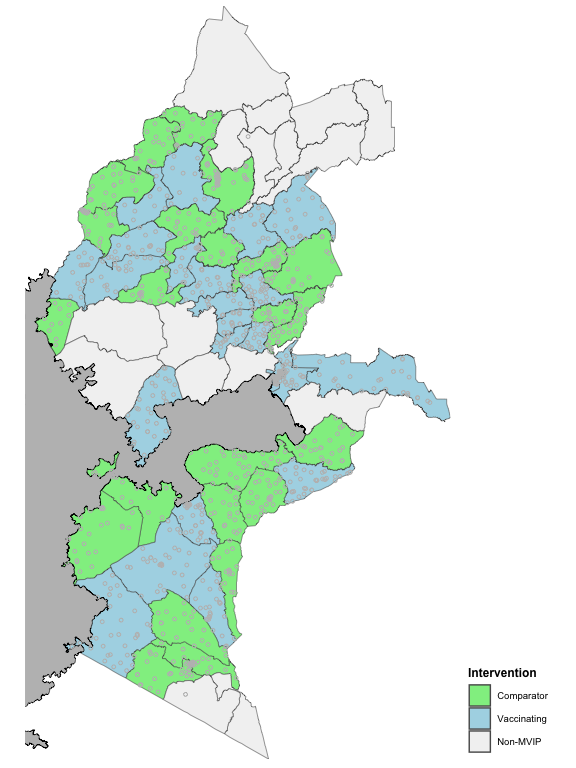


d = facility_characteristics( mcc0, vx )

# d %>% flextable() %>% FitFlextableToPage()

saveRDS( d , paste0( params$output , 'rawCharacteristics.rds' ) )

#|tbl-cap: Characteristics of unadjusted (raw) dataset

ft_characteristics( d )

| **Intervention** | **selected** | **Facilities** | **MOHa** | **<5y Malaria(%)** | **RTS,S Doses(%)** | **PBO-netsb** | **IRSc** |
| --- | --- | --- | --- | --- | --- | --- | --- |
| Comparison |  | 781 | 56.1% | 2,599,576 (48.2%) | 0 (0.0%) | 43.7% | 38.2% |
| Implementing |  | 747 | 57.3% | 2,796,140 (51.8%) | 928,646 (100.0%) | 33.8% | 23.9% |
| a: Percent of facilities owned by Ministry of Health. Other facilities owned by 'Private', 'Mission/Faith-Based Organization', or 'Non-Governmental Organization'. Owner was not incidated for 24.8% of facilities | | | | | | | |
| b: Percent of facilities where PBO nets distributed during mass campaign in 2021 | | | | | | | |
| c: Percent of facilities where IRS applied annually | | | | | | | |

### - Under5 (unadjusted-all facilities, no outliers removed) [mcc0], no covariate

d = dataset( mcc0 , , unadjusted = TRUE , startMonth = yearmonth( "Jan 2013" ))

test.forecasts = tsmodels( d$pre.intervention.train , d$pre.intervention.test ,
 type = "transform" )

Preparing primary models
 Primary models finished. 2.616 sec elapsed
Preparing primary forecasts...
 Primary forecasts finished 28.793 sec elapsed
Preparing ensemble forecasts...
 Ensemble forecasts finished 4.975 sec elapsed
Total time 36.384 sec elapsed

validations = model_metrics( test.forecasts , d$pre.intervention.test )

Calculating monthly SWAPE
 1.934 sec elapsed
Calculating mean SWAPE
 Total time 1.941 sec elapsed

model_selection = modelSelection( validations , type = 'synchronize' )
model_selection

# A tibble: 2 × 2
# Groups: Intervention [2]
 Intervention .model
 <fct> <chr>
1 Comparison aent
2 Implementing aent

evaluation.forecasts = tsmodels( d$pre.intervention , d$post.intervention ,
 type = "transform" ) %>%
 semi_join( model_selection , by = c( 'Intervention', '.model' ))

Preparing primary models
 Primary models finished. 3.627 sec elapsed
Preparing primary forecasts...
 Primary forecasts finished 62.204 sec elapsed
Preparing ensemble forecasts...
 Ensemble forecasts finished 5.046 sec elapsed
Total time 70.877 sec elapsed

impact.tableaux( d$fable.data.age , evaluation.forecasts )

`mutate_if()` ignored the following grouping variables:
• Columns `Intervention`, `.model`, `Month`


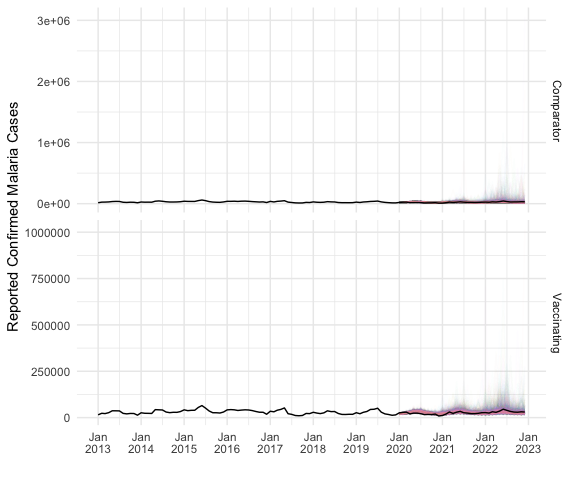


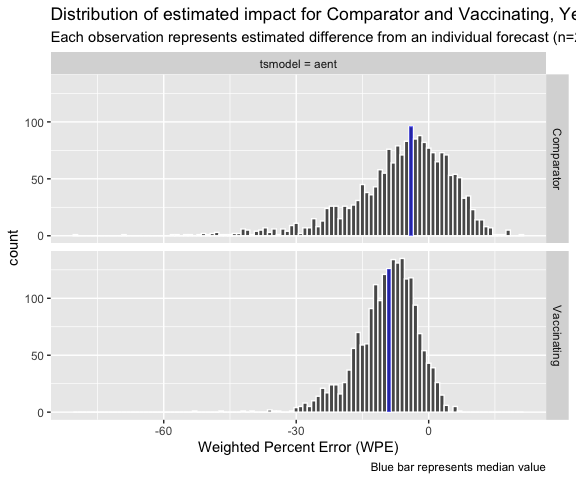


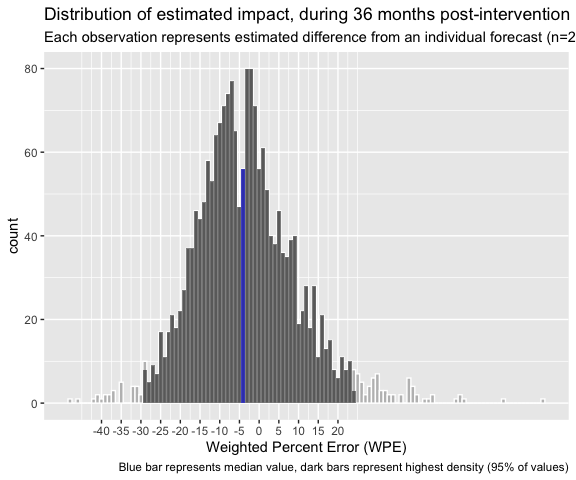


| Intervention | .model | n | mean | sd | median | hdi_lower | hdi_upper |
| --- | --- | --- | --- | --- | --- | --- | --- |
| Comparison | aent | 2,000 | -6.2 | 11.5 | -4.4 | -28.8 | 14.2 |
| Implementing | aent | 2,000 | -9.4 | 6.8 | -8.6 | -23.6 | 2.5 |
| Impact (1-36 months) | Implementing - Comparison | 2,000 | -3.2 | 13.4 | -4.1 | -29.1 | 23.9 |

rawUnder5 = list( actual = d$fable.data.age,
 predicted = evaluation.forecasts )

saveRDS( rawUnder5, paste0( params$output , 'rawUnder5.rds' ) ,
 compress = FALSE )

### - Raw Over4 (unadjusted-all facilities, no outliers removed) [mcc0], no covariate

d = dataset( mcc0 , , unadjusted = TRUE , startMonth = yearmonth( "Jan 2013" ) )

test.forecasts = tsmodels( d$pre.intervention.train , d$pre.intervention.test ,
 type = "transform" , .var = 'older' )

Preparing primary models
 Primary models finished. 2.563 sec elapsed
Preparing primary forecasts...
 Primary forecasts finished 25.698 sec elapsed
Preparing ensemble forecasts...
 Ensemble forecasts finished 4.344 sec elapsed
Total time 32.606 sec elapsed

validations = model_metrics( test.forecasts , d$pre.intervention.test,
 .var = 'older' )

Calculating monthly SWAPE
 1.693 sec elapsed
Calculating mean SWAPE
 Total time 1.7 sec elapsed

model_selection = modelSelection( validations , type = 'synchronize' )
model_selection

# A tibble: 2 × 2
# Groups: Intervention [2]
 Intervention .model
 <fct> <chr>
1 Comparison en
2 Implementing en

evaluation.forecasts = tsmodels( d$pre.intervention , d$post.intervention ,
 type = "transform", .var = 'older' ) %>%
 semi_join( model_selection , by = c( 'Intervention', '.model' ))

Preparing primary models
 Primary models finished. 3.76 sec elapsed
Preparing primary forecasts...
 Primary forecasts finished 59.42 sec elapsed
Preparing ensemble forecasts...
 Ensemble forecasts finished 4.888 sec elapsed
Total time 68.068 sec elapsed

impact.tableaux( d$fable.data.age , evaluation.forecasts )

`mutate_if()` ignored the following grouping variables:
• Columns `Intervention`, `.model`, `Month`


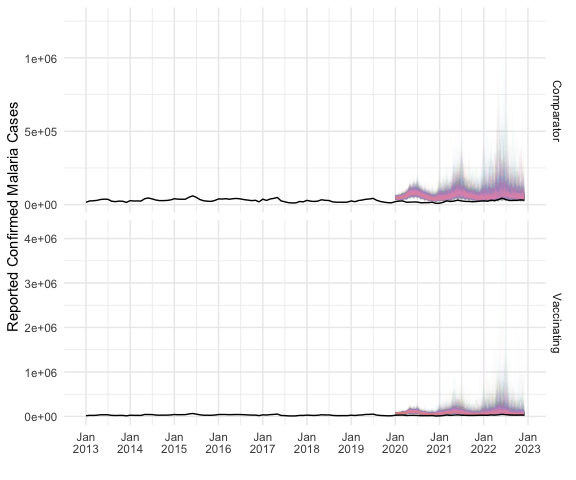


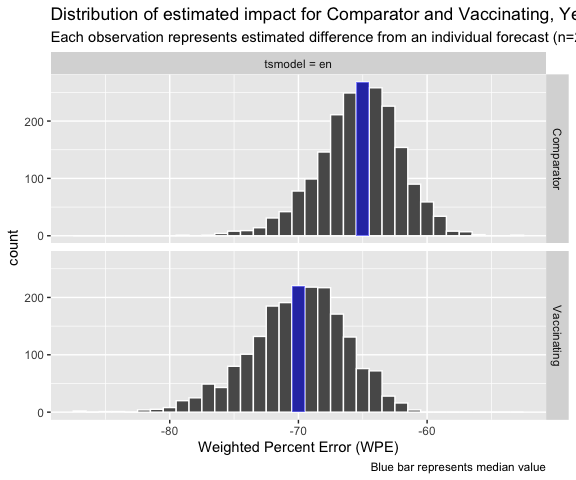


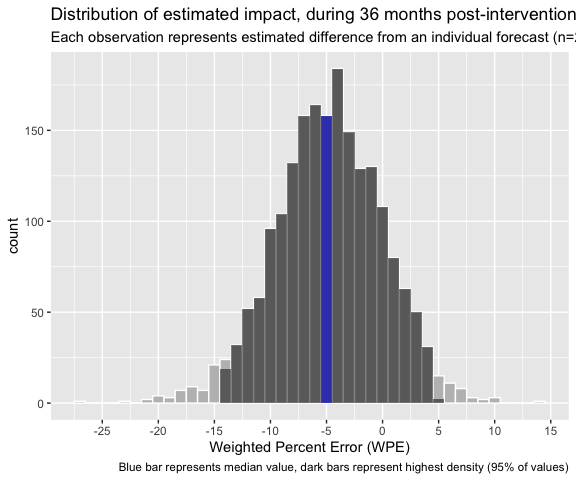


| Intervention | .model | n | mean | sd | median | hdi_lower | hdi_upper |
| --- | --- | --- | --- | --- | --- | --- | --- |
| Comparison | en | 2,000 | -65.3 | 3.1 | -65.1 | -71.2 | -59.0 |
| Implementing | en | 2,000 | -70.1 | 3.7 | -69.8 | -77.2 | -62.9 |
| Impact (1-36 months) | Implementing - Comparison | 2,000 | -4.8 | 4.8 | -4.7 | -14.2 | 4.6 |

rawOver4 = list( actual = d$fable.data.age,
 predicted = evaluation.forecasts ,
 .var = 'older' )
saveRDS( rawOver4 ,
 paste0( params$output , 'rawOver4.rds' ) ,
 compress = FALSE )

### - Raw Under5 with Over4 as covariate (unadjusted-all facilities, no outliers removed) [mcc0]

d = dataset( mcc0 , unadjusted = TRUE , startMonth = yearmonth( "Jan 2013" ) )

test.forecasts = tsmodels( d$pre.intervention.train , d$pre.intervention.test ,
 type = "transform and covariate" ,
 covariate = 'older' )

Preparing primary models
 Primary models finished. 4.204 sec elapsed
Preparing primary forecasts...
 Primary forecasts finished 26.268 sec elapsed
Preparing ensemble forecasts...
 Ensemble forecasts finished 4.325 sec elapsed
Total time 34.797 sec elapsed

validations = model_metrics( test.forecasts , d$pre.intervention.test )

Calculating monthly SWAPE
 1.653 sec elapsed
Calculating mean SWAPE
 Total time 1.66 sec elapsed

model_selection = modelSelection( validations , type = 'synchronize' )
model_selection

# A tibble: 2 × 2
# Groups: Intervention [2]
 Intervention .model
 <fct> <chr>
1 Comparison a
2 Implementing a

evaluation.forecasts = tsmodels( d$pre.intervention , d$post.intervention,
 type = "transform and covariate" ,
 covariate = 'older' ) %>%
 semi_join( model_selection , by = c( 'Intervention', '.model' ))

Preparing primary models
 Primary models finished. 5.592 sec elapsed
Preparing primary forecasts...
 Primary forecasts finished 60.931 sec elapsed
Preparing ensemble forecasts...
 Ensemble forecasts finished 5.056 sec elapsed
Total time 71.579 sec elapsed

# interventionDifference = diff( evaluation.forecasts , d$post.intervention )

impact.tableaux( d$fable.data.age , evaluation.forecasts )

`mutate_if()` ignored the following grouping variables:
• Columns `Intervention`, `.model`, `Month`


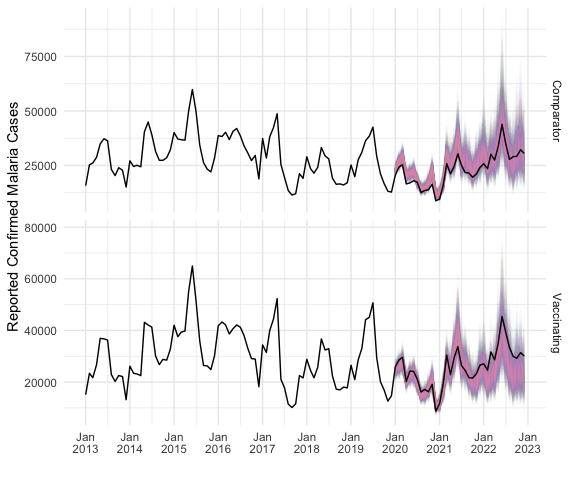


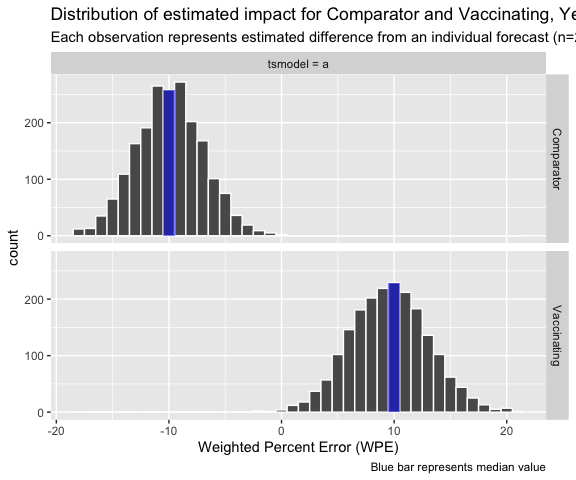


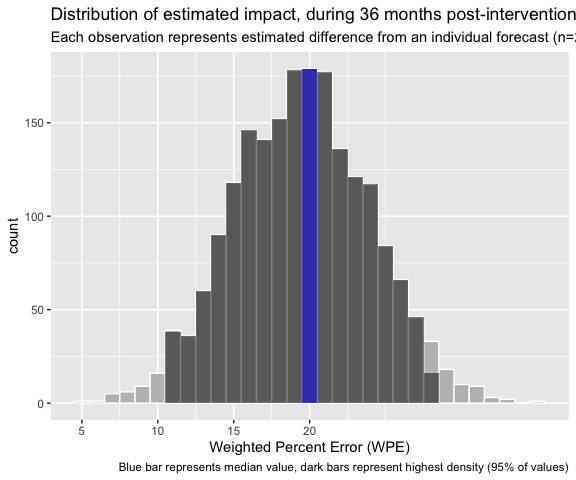


| Intervention | .model | n | mean | sd | median | hdi_lower | hdi_upper |
| --- | --- | --- | --- | --- | --- | --- | --- |
| Comparison | a | 2,000 | -9.9 | 3.0 | -10.0 | -15.9 | -4.2 |
| Implementing | a | 2,000 | 9.6 | 3.5 | 9.6 | 2.6 | 16.2 |
| Impact (1-36 months) | Implementing - Comparison | 2,000 | 19.5 | 4.5 | 19.5 | 10.6 | 27.9 |

rawCovariate = list( actual = d$fable.data.age,
 predicted = evaluation.forecasts ,
 .var = 'older' )

saveRDS( rawCovariate, paste0( params$output , 'rawCovariate.rds' ) ,
 compress = FALSE )

## Cleaned data: All facilities with outliers removed and CHEW associated with OPD (mcc4) and Over4 covariate

d = facility_characteristics( mcc4, vx )

saveRDS( d , paste0( params$output , 'raw(mcc4)Characteristics.rds' ) )

#|tbl-cap: Characteristics of unadjusted (raw) dataset

ft_characteristics( d )

| **Intervention** | **selected** | **Facilities** | **MOHa** | **<5y Malaria(%)** | **RTS,S Doses(%)** | **PBO-netsb** | **IRSc** |
| --- | --- | --- | --- | --- | --- | --- | --- |
| Comparison |  | 781 | 56.1% | 2,599,576 (48.2%) | 0 (0.0%) | 43.7% | 38.2% |
| Implementing |  | 747 | 57.3% | 2,796,140 (51.8%) | 928,646 (100.0%) | 33.8% | 23.9% |
| a: Percent of facilities owned by Ministry of Health. Other facilities owned by 'Private', 'Mission/Faith-Based Organization', or 'Non-Governmental Organization'. Owner was not incidated for 24.8% of facilities | | | | | | | |
| b: Percent of facilities where PBO nets distributed during mass campaign in 2021 | | | | | | | |
| c: Percent of facilities where IRS applied annually | | | | | | | |

### - Under 5 only

d = dataset( mcc4 , unadjusted = FALSE, startMonth = yearmonth( "Jan 2013" ) )

test.forecasts = tsmodels( d$pre.intervention.train , d$pre.intervention.test ,
 type = "transform" )

Preparing primary models
 Primary models finished. 2.988 sec elapsed
Preparing primary forecasts...
 Primary forecasts finished 26.332 sec elapsed
Preparing ensemble forecasts...
 Ensemble forecasts finished 4.604 sec elapsed
Total time 33.925 sec elapsed

validations = model_metrics( test.forecasts , d$pre.intervention.test )

Calculating monthly SWAPE
 1.863 sec elapsed
Calculating mean SWAPE
 Total time 1.869 sec elapsed

model_selection = modelSelection( validations , type = 'synchronize' )
model_selection

# A tibble: 2 × 2
# Groups: Intervention [2]
 Intervention .model
 <fct> <chr>
1 Comparison aent
2 Implementing aent

evaluation.forecasts = tsmodels( d$pre.intervention , d$post.intervention ,
 type = "transform" ) %>%
 semi_join( model_selection , by = c( 'Intervention', '.model' ))

Preparing primary models
 Primary models finished. 4.242 sec elapsed
Preparing primary forecasts...
 Primary forecasts finished 60.773 sec elapsed
Preparing ensemble forecasts...
 Ensemble forecasts finished 5.309 sec elapsed
Total time 70.325 sec elapsed

impact.tableaux( d$fable.data.age , evaluation.forecasts )

`mutate_if()` ignored the following grouping variables:
• Columns `Intervention`, `.model`, `Month`


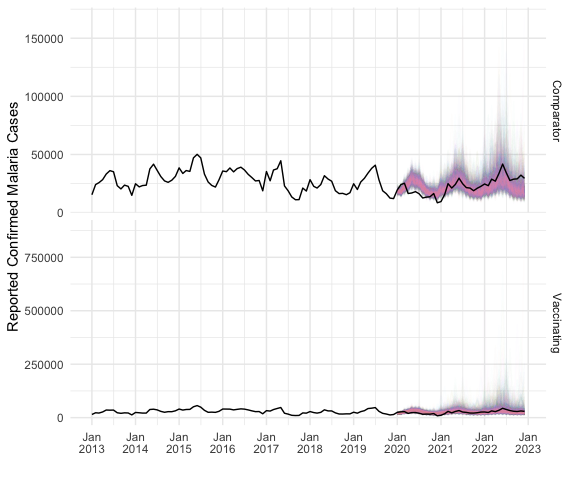


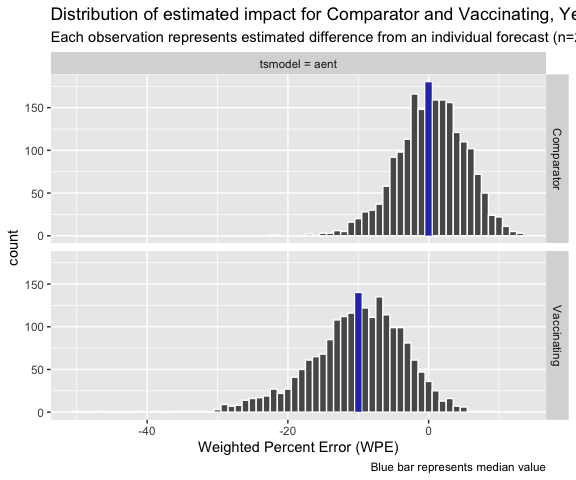


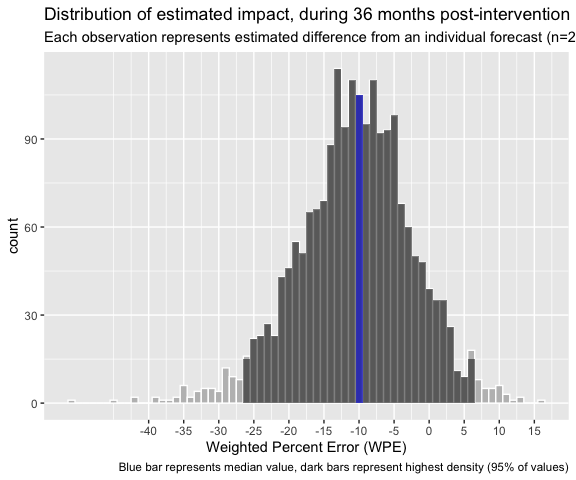


| Intervention | .model | n | mean | sd | median | hdi_lower | hdi_upper |
| --- | --- | --- | --- | --- | --- | --- | --- |
| Comparison | aent | 2,000 | 0.4 | 4.8 | 0.5 | -9.1 | 9.6 |
| Implementing | aent | 2,000 | -10.2 | 6.8 | -9.7 | -24.8 | 1.9 |
| Impact (1-36 months) | Implementing - Comparison | 2,000 | -10.6 | 8.3 | -10.3 | -26.4 | 6.3 |

cleanedUnder5 = list( actual = d$fable.data.age,
 predicted = evaluation.forecasts ,
 .var = 'older' )

saveRDS( cleanedUnder5, paste0( params$output , 'cleanedUnder5.rds' ) ,
 compress = FALSE )

### - Over 4 only

d = dataset( mcc4 , unadjusted = FALSE, startMonth = yearmonth( "Jan 2013" ) )

test.forecasts = tsmodels( d$pre.intervention.train , d$pre.intervention.test ,
 type = "transform" ,
 .var = 'older' )

Preparing primary models
 Primary models finished. 2.829 sec elapsed
Preparing primary forecasts...
 Primary forecasts finished 27.009 sec elapsed
Preparing ensemble forecasts...
 Ensemble forecasts finished 4.849 sec elapsed
Total time 34.688 sec elapsed

validations = model_metrics( test.forecasts , d$pre.intervention.test ,
 .var = 'older' )

Calculating monthly SWAPE
 1.823 sec elapsed
Calculating mean SWAPE
 Total time 1.829 sec elapsed

model_selection = modelSelection( validations , type = 'synchronize' )
model_selection

# A tibble: 2 × 2
# Groups: Intervention [2]
 Intervention .model
 <fct> <chr>
1 Comparison aen
2 Implementing aen

evaluation.forecasts = tsmodels( d$pre.intervention , d$post.intervention ,
 type = "transform" ,
 .var = 'older' ) %>%
 semi_join( model_selection , by = c( 'Intervention', '.model' ))

Preparing primary models
 Primary models finished. 6.09 sec elapsed
Preparing primary forecasts...
 Primary forecasts finished 61.617 sec elapsed
Preparing ensemble forecasts...
 Ensemble forecasts finished 5.439 sec elapsed
Total time 73.146 sec elapsed

impact.tableaux( d$fable.data.age , evaluation.forecasts )

`mutate_if()` ignored the following grouping variables:
• Columns `Intervention`, `.model`, `Month`


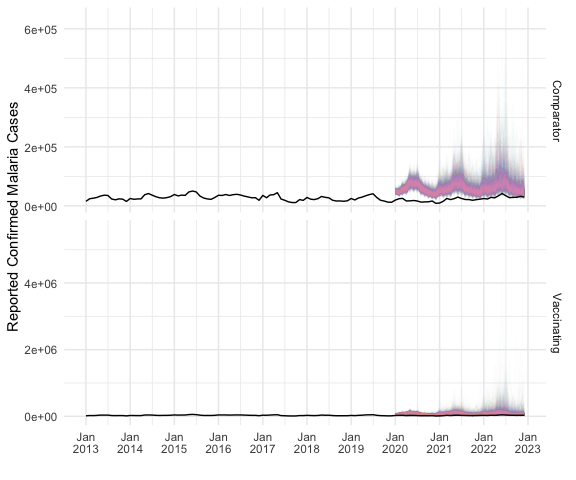


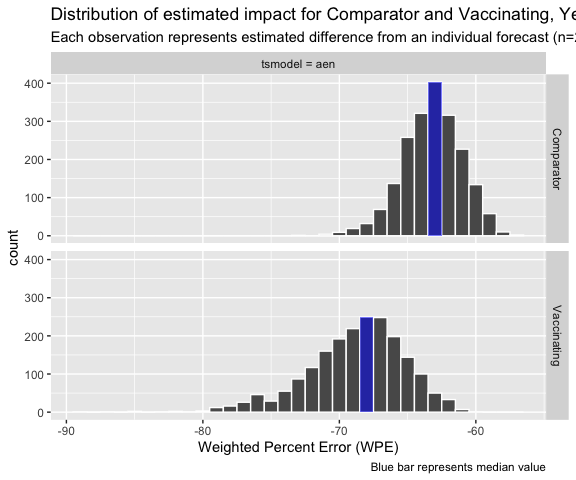


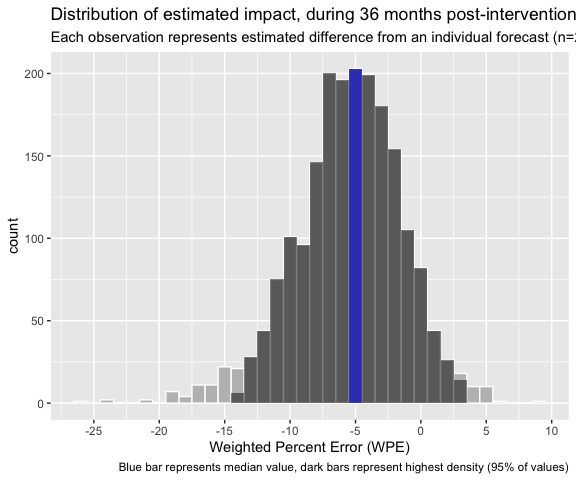


| Intervention | .model | n | mean | sd | median | hdi_lower | hdi_upper |
| --- | --- | --- | --- | --- | --- | --- | --- |
| Comparison | aen | 2,000 | -63.2 | 2.2 | -63.1 | -67.3 | -59.0 |
| Implementing | aen | 2,000 | -68.8 | 3.6 | -68.4 | -76.4 | -62.3 |
| Impact (1-36 months) | Implementing - Comparison | 2,000 | -5.6 | 4.2 | -5.3 | -13.7 | 3.1 |

cleanedOver4 = list( actual = d$fable.data.age,
 predicted = evaluation.forecasts ,
 .var = 'older' )

saveRDS( cleanedOver4, paste0( params$output , 'cleanedOver4.rds' ) ,
 compress = FALSE )

### - Under 5 with Over 4 Covariate

d = dataset( mcc4 , unadjusted = FALSE, startMonth = yearmonth( "Jan 2013" ) )

test.forecasts = tsmodels( d$pre.intervention.train , d$pre.intervention.test ,
 type = "transform and covariate" ,
 covariate = 'older' )

Preparing primary models
 Primary models finished. 4.519 sec elapsed
Preparing primary forecasts...
 Primary forecasts finished 25.286 sec elapsed
Preparing ensemble forecasts...
 Ensemble forecasts finished 4.364 sec elapsed
Total time 34.169 sec elapsed

validations = model_metrics( test.forecasts , d$pre.intervention.test )

Calculating monthly SWAPE
 1.615 sec elapsed
Calculating mean SWAPE
 Total time 1.621 sec elapsed

model_selection = modelSelection( validations , type = 'synchronize' )
model_selection

# A tibble: 2 × 2
# Groups: Intervention [2]
 Intervention .model
 <fct> <chr>
1 Comparison antp4
2 Implementing antp4

evaluation.forecasts = tsmodels( d$pre.intervention , d$post.intervention ,
 type = "transform and covariate" ,
 covariate = 'older' ) %>%
 semi_join( model_selection , by = c( 'Intervention', '.model' ))

Preparing primary models
 Primary models finished. 6.378 sec elapsed
Preparing primary forecasts...
 Primary forecasts finished 58.572 sec elapsed
Preparing ensemble forecasts...
 Ensemble forecasts finished 5.157 sec elapsed
Total time 70.108 sec elapsed

impact.tableaux( d$fable.data.age , evaluation.forecasts )

`mutate_if()` ignored the following grouping variables:
• Columns `Intervention`, `.model`, `Month`


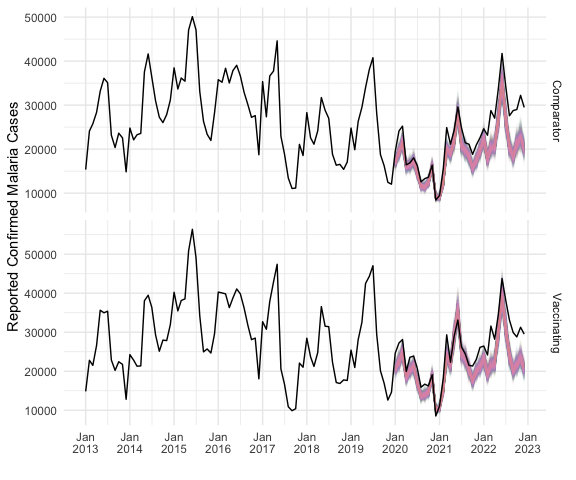


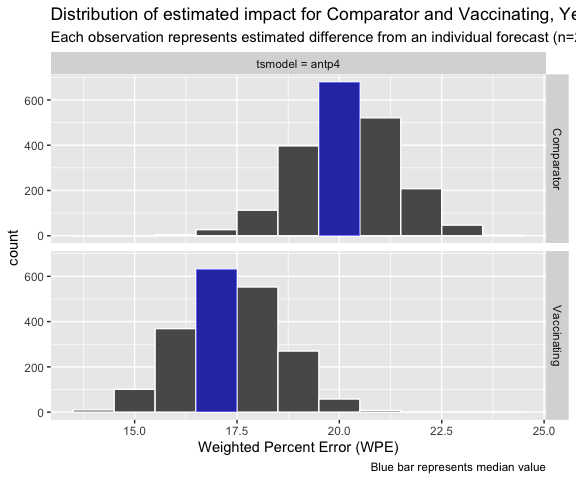


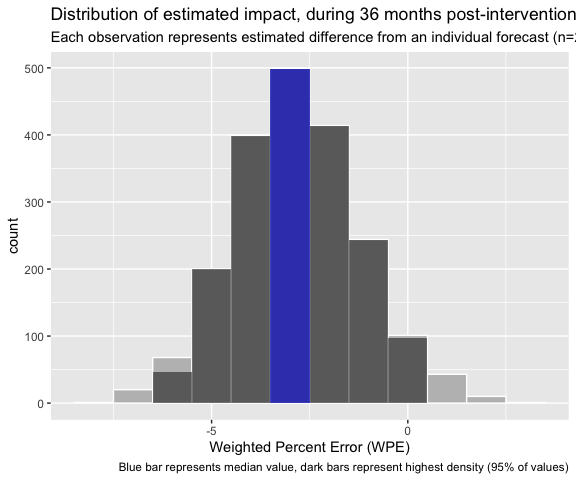


| Intervention | .model | n | mean | sd | median | hdi_lower | hdi_upper |
| --- | --- | --- | --- | --- | --- | --- | --- |
| Comparison | antp4 | 2,000 | 20.2 | 1.2 | 20.2 | 17.8 | 22.5 |
| Implementing | antp4 | 2,000 | 17.4 | 1.2 | 17.3 | 15.1 | 19.6 |
| Impact (1-36 months) | Implementing - Comparison | 2,000 | -2.8 | 1.6 | -2.9 | -6.1 | 0.4 |

cleanedCovariate = list( actual = d$fable.data.age,
 predicted = evaluation.forecasts ,
 .var = 'older' )

saveRDS( cleanedCovariate, paste0( params$output , 'cleanedCovariate.rds' ) ,
 compress = FALSE )

## Adjusted data (mcc5)

#|label: mcc5.consistency
#|fig-cap: "Number of facilities consistently reporting (minimum 11 of 12 months) confirmed cases each year"

dataset.consisency( mcc5 )


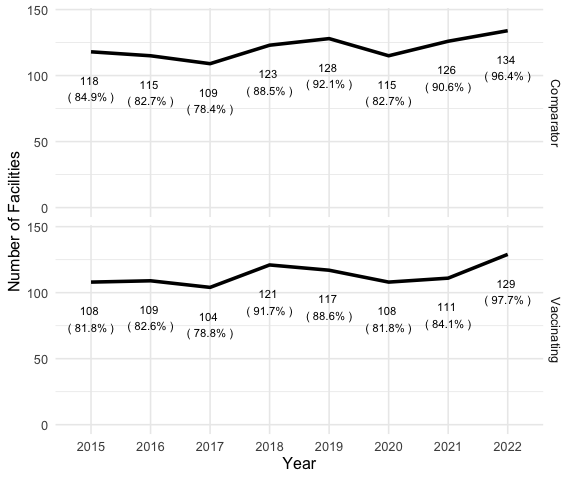


ggsave( paste0( params$output ,'adjusted(mcc5).consistency.png' ), dpi = 300 , width = 6)

Saving 6 x 5 in image

mcc5.facilities = mvip.facilities %>%
 filter( st_geometry_type(.) == "POINT" ) %>%
 mutate( included = ifelse( orgUnit %in% consistently_reporting_facilities, 'Included', 'Excluded' ))


base_map +

 geom_sf( data = mvip.facilities %>% filter( st_geometry_type(.) == "POINT" ) ,
 color = 'grey' , size = 1 , shape = 21 , aes( color = included ) ) +

 geom_sf( data = mcc5.facilities %>% filter( included == "Included" ),
 color = 'blue' , size = 1 , shape = 21 , aes( color = included , fill = Intervention ) ) +

 coord_sf(
 xlim = c( boundaryBox[1], boundaryBox[3]),
 ylim = c(boundaryBox[2], boundaryBox[4] ),
 expand = FALSE
 )

Coordinate system already present. Adding new coordinate system, which will
replace the existing one.


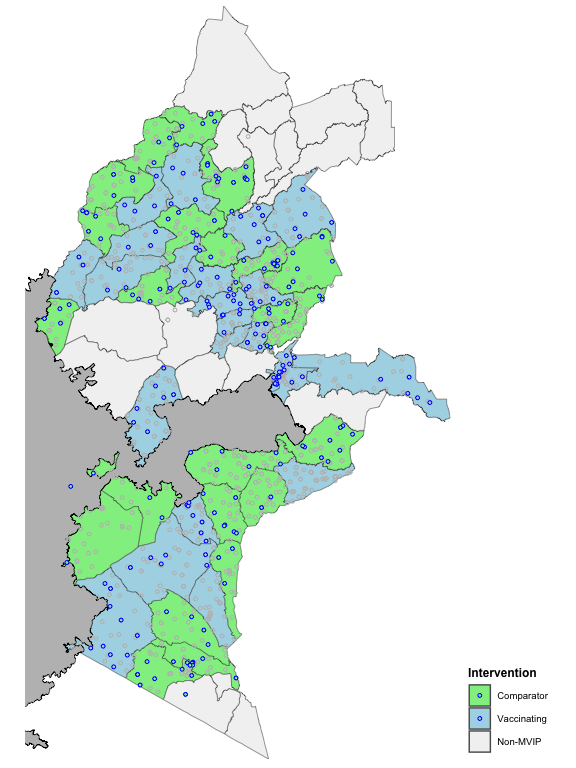


d = facility_characteristics( mcc5, vx,
 selected_facilities = consistently_reporting_facilities,
 errs = FALSE )

saveRDS( d , paste0( params$output , 'adjustedCharacteristics.rds' ) )

#|tbl-cap: Characteristics of adjusted dataset

ft_characteristics( d , errs = FALSE )

| **Intervention** | **selected** | **Facilities** | **MOHa** | **<5y Malaria(%)** | **RTS,S Doses(%)** | **PBO-netsb** | **IRSc** |
| --- | --- | --- | --- | --- | --- | --- | --- |
| Comparison | TRUE | 139 | 60.4% | 1,004,891 (18.6%) | 0 (0.0%) | 46.8% | 33.8% |
| Implementing | TRUE | 132 | 59.1% | 944,082 (17.5%) | 374,001 (40.3%) | 45.5% | 18.9% |
| Comparison |  | 642 | 55.0% | 1,594,685 (29.6%) | 0 (0.0%) | 43.3% | 38.8% |
| Implementing |  | 615 | 56.9% | 1,852,058 (34.3%) | 554,645 (59.7%) | 32.4% | 24.5% |
| a: Percent of facilities owned by Ministry of Health. Other facilities owned by 'Private', 'Mission/Faith-Based Organization', or 'Non-Governmental Organization'. Owner was not incidated for 24.8% of facilities | | | | | | | |
| b: Percent of facilities where PBO nets distributed during mass campaign in 2021 | | | | | | | |
| c: Percent of facilities where IRS applied annually | | | | | | | |

mcc5.facilities = mvip.facilities %>%
 mutate( included = ifelse( orgUnit %in% consistently_reporting_facilities, 'Included', 'Excluded' ))

base_map +

 geom_sf( data = mvip.facilities ,
 color = 'grey' , size = 1 ) +

 geom_sf( data = mcc5.facilities %>% filter( included == "Included" ),
 color = 'blue' , size = 1 , shape = 21 , aes( fill = Intervention ) ) +

 # geom_sf( data = mcc6.facilities %>% filter( included == "Included" ) ,
 # color = 'red' , size = 1 , shape = 21 , aes( fill = Intervention ) ) +

 coord_sf(
 xlim = c( boundaryBox[1], boundaryBox[3]),
 ylim = c(boundaryBox[2], boundaryBox[4] ),
 expand = FALSE
 )

Coordinate system already present. Adding new coordinate system, which will
replace the existing one.


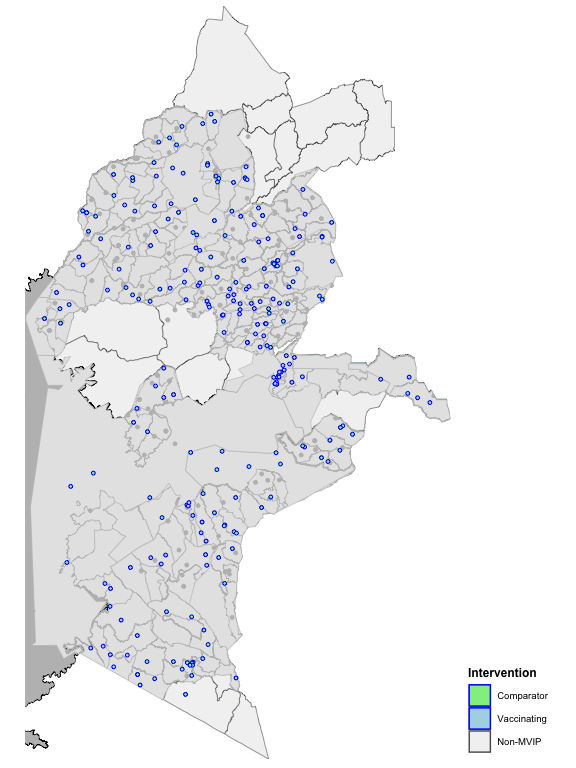


ggsave( paste0( params$image.dir , 'adjustedMap.png' ) , dpi = 300, width = 6 )

Saving 6 x 8 in image

### - Under5 only

### - Over 4 only

### - Under5 with Over4 Covariate

## Always reporting from 2020 (mcc6), consistentently reporting since 2015

## Always reporting from since 2015 (mcc7)

start_month = yearmonth("Jan 2015")
allowable_missing = 0

always_reporting_facilities_2015_0 = reporting_consistency %>%
 filter( Starting == start_month &
 MissingPerYr == allowable_missing ) %>%
 pull( Facilities ) %>% unlist


mcc7 = mcc5 %>%
 filter( orgUnit %in% always_reporting_facilities_2015_0 )

mcc7 %>% as_tibble %>% ungroup %>% group_by( Intervention ) %>%
 summarise( Facilities = n_distinct( orgUnit )) %>% flextable()

| Intervention | Facilities |
| --- | --- |
| Comparison | 55 |
| Implementing | 47 |

#|label: mcc6.consistency
#|fig-cap: "Number of facilities consistently reporting (minimum 11 of 12 months) confirmed cases each year"

dataset.consisency( mcc7 )


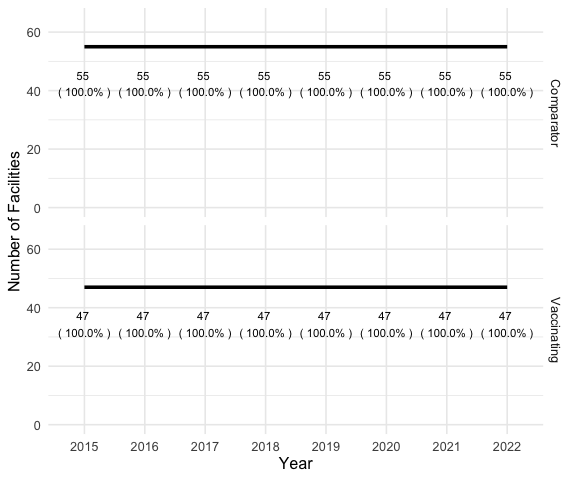


ggsave( paste0( params$image.dir ,'adjusted(mcc6).consistency.png' ), dpi = 300 , width = 6)

Saving 6 x 5 in image

d = facility_characteristics( mcc7, vx )

saveRDS( d , paste0( params$output , 'always2015Characteristics.rds' ) )

#|tbl-cap: Characteristics of adjusted dataset

ft_characteristics( d )

| **Intervention** | **selected** | **Facilities** | **MOHa** | **<5y Malaria(%)** | **RTS,S Doses(%)** | **PBO-netsb** | **IRSc** |
| --- | --- | --- | --- | --- | --- | --- | --- |
| Comparison |  | 781 | 56.1% | 2,599,576 (48.2%) | 0 (0.0%) | 43.7% | 38.2% |
| Implementing |  | 747 | 57.3% | 2,796,140 (51.8%) | 928,646 (100.0%) | 33.8% | 23.9% |
| a: Percent of facilities owned by Ministry of Health. Other facilities owned by 'Private', 'Mission/Faith-Based Organization', or 'Non-Governmental Organization'. Owner was not incidated for 24.8% of facilities | | | | | | | |
| b: Percent of facilities where PBO nets distributed during mass campaign in 2021 | | | | | | | |
| c: Percent of facilities where IRS applied annually | | | | | | | |

if (!exists( "mvip.boundaries.interventions" ) ) mvip.boundaries.interventions = readRDS( paste0( params$output, 'mvip.boundaries.interventions.rds' ) )

if (!exists( "mvip.facilities" ) ) mvip.facilities = readRDS( paste0( params$output, 'mvip.facilities.rds' ) )

# note that some coordinates are outside MVIP, probably because of data entry error
boundaryBox = mvip.boundaries.interventions %>% st_bbox()

mcc7.facilities = mvip.facilities %>%
 mutate( included = ifelse( orgUnit %in% always_reporting_facilities_2015_0, 'Included', 'Excluded' ))

mcc5.facilities = mvip.facilities %>%
 mutate( included = ifelse( orgUnit %in% consistently_reporting_facilities, 'Included', 'Excluded' ))

if (!exists( 'base_map') ) base_map = read_rds( paste0( params$output , 'base_map.rds' ))

base_map +

 geom_sf( data = mvip.facilities ,
 color = 'grey' , size = 1 , shape = 21 , aes( fill = Intervention ) ) +

 geom_sf( data = mcc5.facilities %>% filter( included == "Included" ),
 color = 'blue' , size = 1 , shape = 21 , aes( fill = Intervention ) ) +

 geom_sf( data = mcc6.facilities %>% filter( included == "Included" ) ,
 color = 'red' , size = 1 , shape = 21 , aes( fill = Intervention ) ) +

 coord_sf(
 xlim = c( boundaryBox[1], boundaryBox[3]),
 ylim = c(boundaryBox[2], boundaryBox[4] ),
 expand = FALSE
 )

d = dataset( mcc7 )
test.forecasts = tsmodels( d$pre.intervention.train , d$pre.intervention.test,
 type = "transform and covariate" ,
 covariate = 'older' )

Preparing primary models
 Primary models finished. 1.715 sec elapsed
Preparing primary forecasts...
 Primary forecasts finished 26.459 sec elapsed
Preparing ensemble forecasts...
 Ensemble forecasts finished 4.582 sec elapsed
Total time 32.757 sec elapsed

validations = model_metrics( test.forecasts , d$pre.intervention.test )

Calculating monthly SWAPE
 1.857 sec elapsed
Calculating mean SWAPE
 Total time 1.864 sec elapsed

model_selection = modelSelection( validations , type = 'synchronize' )

evaluation.forecasts = tsmodels( d$pre.intervention , d$post.intervention ,
 type = "transform and covariate" ,
 covariate = 'older' ) %>%
 semi_join( model_selection , by = c( 'Intervention', '.model' ))

Preparing primary models
 Primary models finished. 2.295 sec elapsed
Preparing primary forecasts...
 Primary forecasts finished 61.282 sec elapsed
Preparing ensemble forecasts...
 Ensemble forecasts finished 5.121 sec elapsed
Total time 68.698 sec elapsed

impact.tableaux( d$fable.data.age , evaluation.forecasts )

`mutate_if()` ignored the following grouping variables:
• Columns `Intervention`, `.model`, `Month`


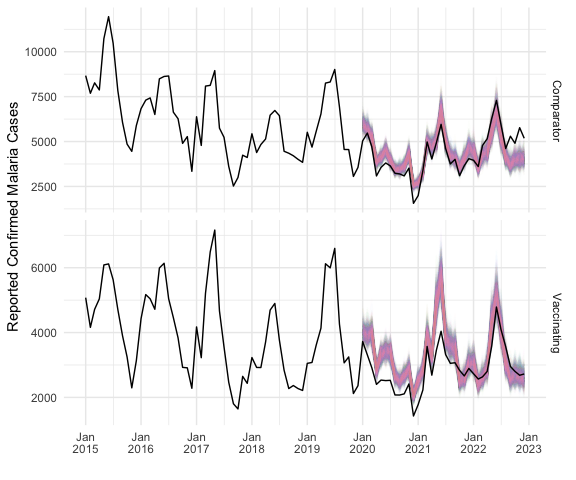


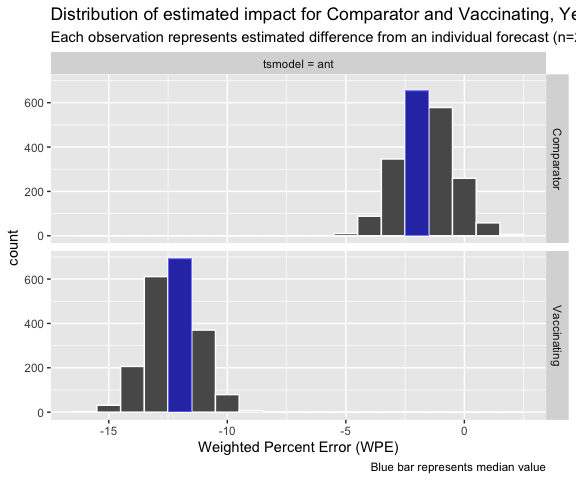


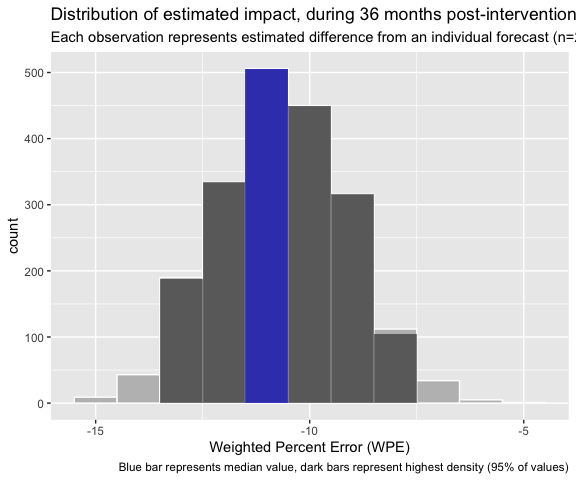


| Intervention | .model | n | mean | sd | median | hdi_lower | hdi_upper |
| --- | --- | --- | --- | --- | --- | --- | --- |
| Comparison | ant | 2,000 | -1.6 | 1.1 | -1.6 | -3.8 | 0.7 |
| Implementing | ant | 2,000 | -12.3 | 1.0 | -12.3 | -14.3 | -10.3 |
| Impact (1-36 months) | Implementing - Comparison | 2,000 | -10.6 | 1.5 | -10.6 | -13.5 | -7.7 |

alwaysReporting2015 = list( actual = d$fable.data.age,
 predicted = evaluation.forecasts ,
 .var = 'older' )
saveRDS( alwaysReporting2015, paste0( params$output , 'alwaysReporting2015.rds' ) ,
 compress = FALSE )

## Adjusted, Primary models only

d = dataset( mcc5 )
test.forecasts = tsmodels( d$pre.intervention.train , d$pre.intervention.test,
 type = "transform and covariate" ,
 covariate = 'older' ,
 ensemble = FALSE )

Preparing primary models
 Primary models finished. 2.112 sec elapsed
Preparing primary forecasts...
 Primary forecasts finished 26.105 sec elapsed
Preparing ensemble forecasts...
Total time 28.217 sec elapsed

validations = model_metrics( test.forecasts , d$pre.intervention.test )

Calculating monthly SWAPE
 0.093 sec elapsed
Calculating mean SWAPE
 Total time 0.095 sec elapsed

model_selection = modelSelection( validations , type = 'synchronize' )
model_selection

# A tibble: 2 × 2
# Groups: Intervention [2]
 Intervention .model
 <fct> <chr>
1 Comparison p8
2 Implementing p8

evaluation.forecasts = tsmodels( d$pre.intervention , d$post.intervention ,
 type = "transform and covariate" ,
 covariate = 'older' ,

 ensemble = FALSE ) %>%

 semi_join( model_selection , by = c( 'Intervention', '.model' ))

Preparing primary models
 Primary models finished. 2.395 sec elapsed
Preparing primary forecasts...
 Primary forecasts finished 59.656 sec elapsed
Preparing ensemble forecasts...
Total time 62.052 sec elapsed

impact.tableaux( d$fable.data.age , evaluation.forecasts )

`mutate_if()` ignored the following grouping variables:
• Columns `Intervention`, `.model`, `Month`


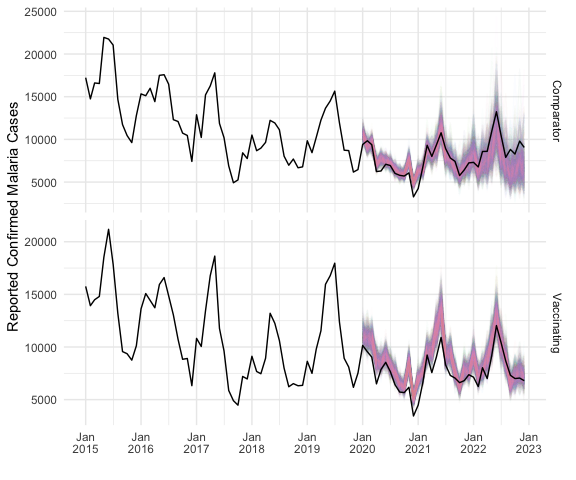


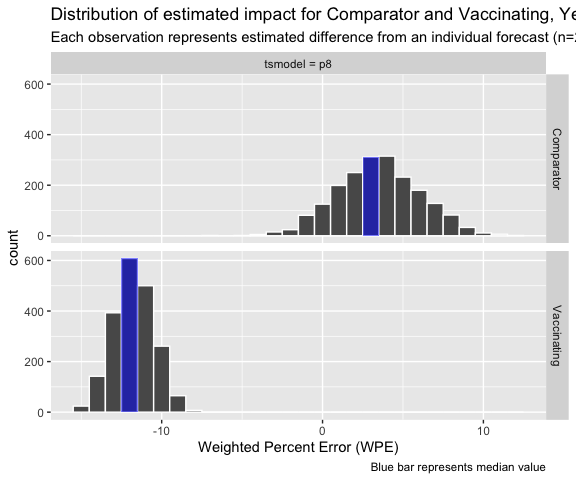


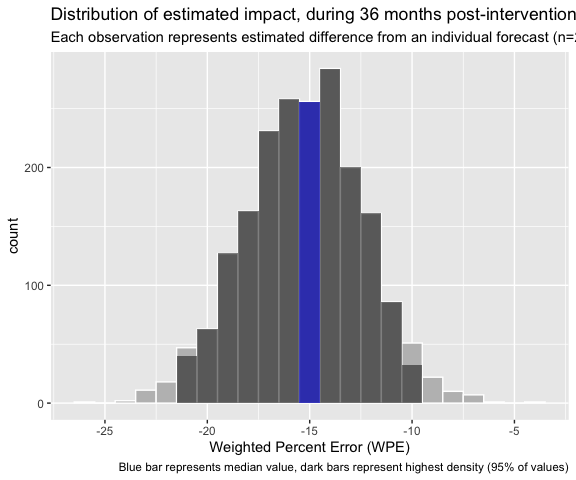


| Intervention | .model | n | mean | sd | median | hdi_lower | hdi_upper |
| --- | --- | --- | --- | --- | --- | --- | --- |
| Comparison | p8 | 2,000 | 3.5 | 2.6 | 3.5 | -1.5 | 8.5 |
| Implementing | p8 | 2,000 | -11.8 | 1.2 | -11.8 | -14.1 | -9.3 |
| Impact (1-36 months) | Implementing - Comparison | 2,000 | -15.2 | 2.9 | -15.2 | -21.2 | -10.0 |

adjustedPrimaryOnly = list( actual = d$fable.data.age,
 predicted = evaluation.forecasts ,
 .var = 'older' )
saveRDS( adjustedPrimaryOnly, paste0( params$output , 'adjustedPrimaryOnly.rds' ) ,
 compress = FALSE )

## Adjusted, ‘Optimized’ models

d = dataset( mcc5 )
test.forecasts = tsmodels( d$pre.intervention.train , d$pre.intervention.test,
 type = "transform and covariate" ,
 covariate = 'older' ,
 ensemble = TRUE )

Preparing primary models
 Primary models finished. 2.13 sec elapsed
Preparing primary forecasts...
 Primary forecasts finished 27.038 sec elapsed
Preparing ensemble forecasts...
 Ensemble forecasts finished 4.458 sec elapsed
Total time 33.626 sec elapsed

validations = model_metrics( test.forecasts , d$pre.intervention.test )

Calculating monthly SWAPE
 1.804 sec elapsed
Calculating mean SWAPE
 Total time 1.81 sec elapsed

model_selection = modelSelection( validations , type = 'optimize' )
model_selection

# A tibble: 2 × 2
# Groups: Intervention [2]
 Intervention .model
 <fct> <chr>
1 Comparison an
2 Implementing nt

evaluation.forecasts = tsmodels( d$pre.intervention , d$post.intervention ,
 type = "transform and covariate" ,
 covariate = 'older' ,
 ensemble = TRUE ) %>%
 semi_join( model_selection , by = c( 'Intervention', '.model' ))

Preparing primary models
 Primary models finished. 2.383 sec elapsed
Preparing primary forecasts...
 Primary forecasts finished 60.58 sec elapsed
Preparing ensemble forecasts...
 Ensemble forecasts finished 4.972 sec elapsed
Total time 67.936 sec elapsed

impact.tableaux( d$fable.data.age , evaluation.forecasts )

`mutate_if()` ignored the following grouping variables:
• Columns `Intervention`, `.model`, `Month`


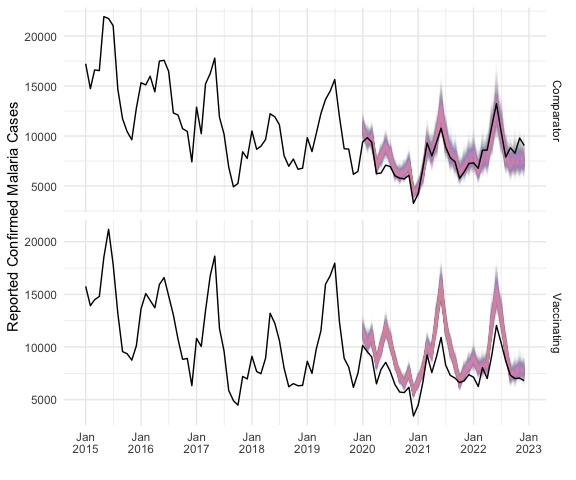


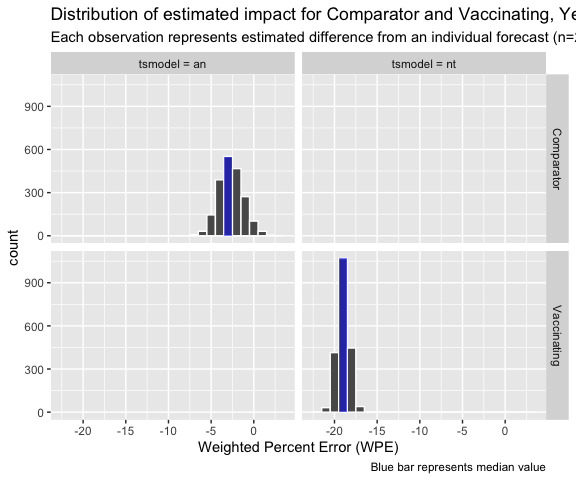


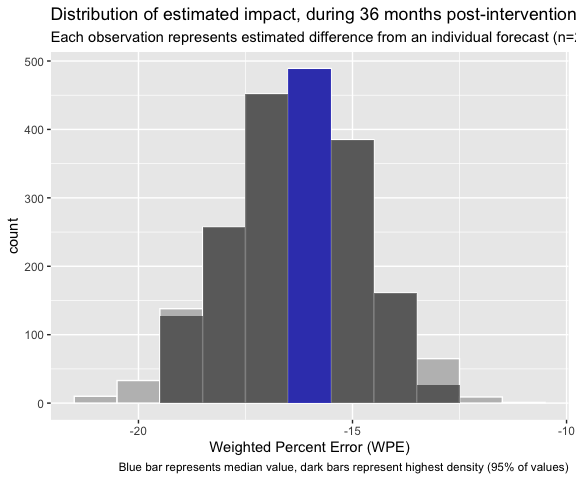


| Intervention | .model | n | mean | sd | median | hdi_lower | hdi_upper |
| --- | --- | --- | --- | --- | --- | --- | --- |
| Comparison | an | 2,000 | -2.7 | 1.4 | -2.7 | -5.3 | 0.1 |
| Implementing | nt | 2,000 | -19.0 | 0.7 | -19.0 | -20.3 | -17.5 |
| Impact (1-36 months) | Implementing - Comparison | 2,000 | -16.3 | 1.6 | -16.3 | -19.4 | -13.2 |

adjustedOptimized = list( actual = d$fable.data.age,
 predicted = evaluation.forecasts ,
 .var = 'older' )
saveRDS( adjustedOptimized, paste0( params$output , 'adjustedOptimized.rds' ),
 compress = FALSE )

## Adjusted, ‘Optimized’ Primary models

d = dataset( mcc5 )
test.forecasts = tsmodels( d$pre.intervention.train , d$pre.intervention.test,
 type = "transform and covariate" ,
 covariate = 'older' ,
 ensemble = FALSE,
 )

Preparing primary models
 Primary models finished. 2.161 sec elapsed
Preparing primary forecasts...
 Primary forecasts finished 26.031 sec elapsed
Preparing ensemble forecasts...
Total time 28.192 sec elapsed

validations = model_metrics( test.forecasts , d$pre.intervention.test )

Calculating monthly SWAPE
 0.094 sec elapsed
Calculating mean SWAPE
 Total time 0.096 sec elapsed

model_selection = modelSelection( validations , type = 'optimize' )
model_selection

# A tibble: 2 × 2
# Groups: Intervention [2]
 Intervention .model
 <fct> <chr>
1 Comparison p8
2 Implementing p8

evaluation.forecasts = tsmodels( d$pre.intervention , d$post.intervention ,
 type = "transform and covariate" ,
 covariate = 'older' ,
 ensemble = FALSE ) %>%
 semi_join( model_selection , by = c( 'Intervention', '.model' ))

Preparing primary models
 Primary models finished. 2.398 sec elapsed
Preparing primary forecasts...
 Primary forecasts finished 60.3 sec elapsed
Preparing ensemble forecasts...
Total time 62.698 sec elapsed

impact.tableaux( d$fable.data.age , evaluation.forecasts )

`mutate_if()` ignored the following grouping variables:
• Columns `Intervention`, `.model`, `Month`


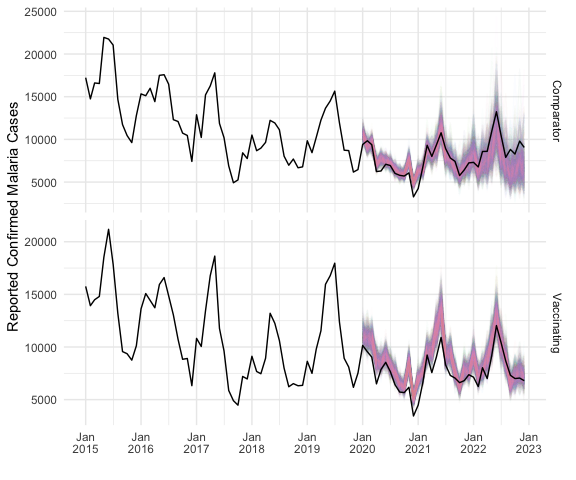


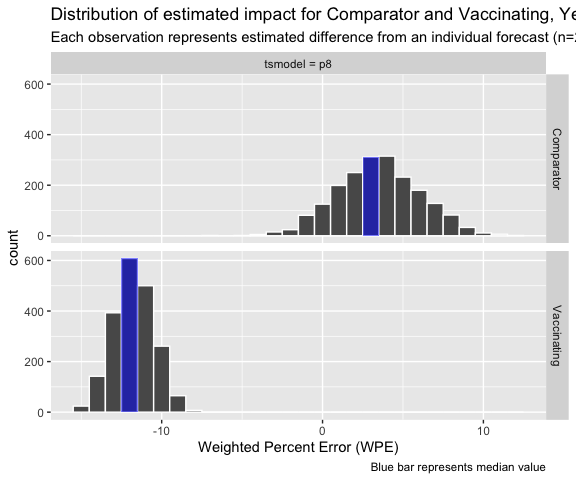


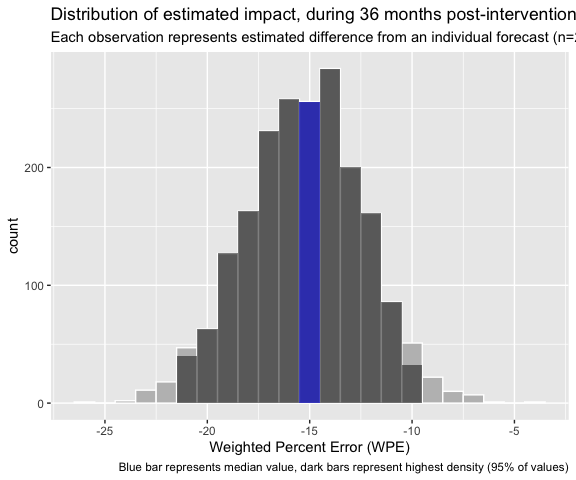


| Intervention | .model | n | mean | sd | median | hdi_lower | hdi_upper |
| --- | --- | --- | --- | --- | --- | --- | --- |
| Comparison | p8 | 2,000 | 3.5 | 2.6 | 3.5 | -1.5 | 8.5 |
| Implementing | p8 | 2,000 | -11.8 | 1.2 | -11.8 | -14.1 | -9.3 |
| Impact (1-36 months) | Implementing - Comparison | 2,000 | -15.2 | 2.9 | -15.2 | -21.2 | -10.0 |

adjustedOptimizedPrimary = list( actual = d$fable.data.age,
 predicted = evaluation.forecasts ,
 .var = 'older' )

saveRDS( adjustedOptimizedPrimary, paste0( params$output ,
 'adjustedOptimizedPrimary.rds' ) ,
 compress = FALSE )

## Ratio of under5 to over4 cases


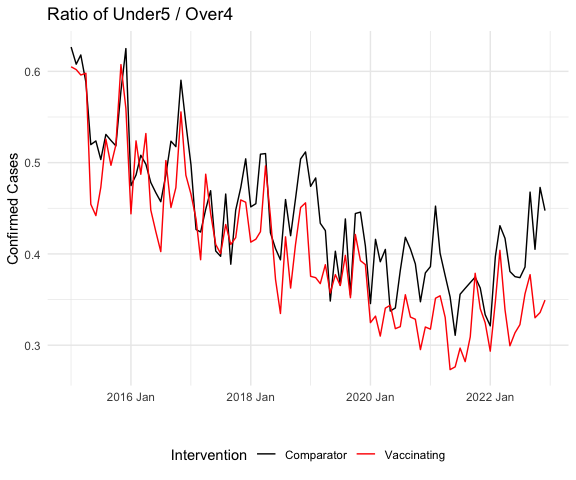


d = dataset( mcc8 , group_by_age = FALSE )

test.forecasts = tsmodels( d$pre.intervention.train , d$pre.intervention.test,
 type = "transform" ,
 .var = 'total'
 )

validations = model_metrics( test.forecasts , d$pre.intervention.test ,
 .var = 'total')

model_selection = modelSelection( validations , type = 'synchronize' )
model_selection

evaluation.forecasts = tsmodels( d$pre.intervention , d$post.intervention ,
 type = "transform" ,
 .var = 'total' ) %>%
 semi_join( model_selection , by = c( 'Intervention', '.model' ))

impact.tableaux( d$fable.data.age , evaluation.forecasts , .var = 'total')

adjustedRatioU5O4 = list( actual = d$fable.data.age,
 predicted = evaluation.forecasts ,
 .var = 'older' )

saveRDS( adjustedRatioU5O4, paste0( params$output ,
 'adjustedRatioU5O4.rds' ) ,
 compress = FALSE )

## Health Facility based models

## Summary

#|tbl-cap: Estimated impact (WPE) with alternative data and/or time-series model parameters

rawUnder5 = readRDS( paste0( params$output , 'rawUnder5.rds' ) )
rawOver4 = readRDS( paste0( params$output , 'rawOver4.rds' ) )
rawCovariate = readRDS( paste0( params$output , 'rawCovariate.rds' ) )

cleanedUnder5 = readRDS( paste0( params$output , 'cleanedUnder5.rds' ) )
cleanedOver4 = readRDS( paste0( params$output , 'cleanedOver4.rds' ) )
cleanedCovariate = readRDS( paste0( params$output , 'cleanedCovariate.rds' ) )

adjustedUnder5 = readRDS( paste0( params$output , 'adjustedUnder5.rds' ) )
adjustedOver4 = readRDS( paste0( params$output , 'adjustedOver4.rds' ) )
adjustedCovariate = readRDS( paste0( params$output , 'adjustedCovariate.rds' ) )

alwaysReporting2015 = readRDS( paste0( params$output ,
 'alwaysReporting2015.rds' ) )
alwaysReporting2020 = readRDS( paste0( params$output ,
 'alwaysReporting2020.rds' ) )

adjustedPrimaryOnly = readRDS( paste0( params$output , 'adjustedPrimaryOnly.rds' ) )
adjustedOptimized = readRDS( paste0( params$output , 'adjustedOptimized.rds' ) )
adjustedOptimizedPrimary = readRDS( paste0( params$output , 'adjustedOptimizedPrimary.rds' ) )

adjustedRatioU5O4 = readRDS( paste0( params$output , 'adjustedRatioU5O4.rds' ) )

impact.near = readRDS( paste0( params$output , 'impact.near.rds' ) )
impact.far = readRDS( paste0( params$output , 'impact.far.rds' ) )

models = list( rawUnder5 = rawUnder5,
 rawOver4 = rawOver4 ,
 rawCovariate = rawCovariate ,

 cleanedUnder5 = cleanedUnder5,
 cleanedOver4 = cleanedOver4,
 cleanedCovariate = cleanedCovariate,

 adjustedUnder5 = adjustedUnder5,
 adjustedOver4 = adjustedOver4,
 adjustedCovariate = adjustedCovariate,

 # alwaysReporting2020 = alwaysReporting2020 ,
 alwaysReporting2015 = alwaysReporting2015 ,

 adjustedPrimaryOnly = adjustedPrimaryOnly ,
 adjustedOptimized = adjustedOptimized ,
 # adjustedOptimizedPrimary = adjustedOptimizedPrimary ,

 impact.near = impact.near ,
 impact.far = impact.far

 # , adjustedRatioU5O4 = adjustedRatioU5O4
 )

m = map_df( 1:length(models) ,
 ~ impactTable( models[.x][[1]]$actual ,
 models[.x][[1]]$predicted ) %>%
 mutate( Scenario = names(models)[.x] )
 ) %>%
 select( Scenario, everything() ) %>%
 mutate( across( where( is.numeric ), \(x) signif(x, 3 )) ,
 CI = paste0( "(", hdi_lower , "," , hdi_upper , ")" ) ,
 Data = case_when(
 grepl( 'raw' , Scenario ) ~ 'Raw' ,
 grepl( 'cleaned', Scenario ) ~ 'Cleaned' ,
 TRUE ~ 'Cleaned and \nconsistently \nreporting'
 ) ,
 Scenario = case_when(
 Scenario == 'impact.near' ~ 'Near Comparison' ,
 Scenario == 'impact.far' ~ 'Far Comparison' ,
 grepl('Covariate', Scenario ) ~ 'Under5 with\nOver4 covariate' ,
 grepl( 'raw' , Scenario ) ~ str_remove( Scenario, 'raw') ,
 grepl( 'cleaned', Scenario ) ~ str_remove( Scenario, 'cleaned') ,
 TRUE ~ str_remove( Scenario, 'adjusted') ,
 ) ,
 )


saveRDS( m, './output/alternative_scenarios_summary.rds' )

# Create the flextable
summary.data = m %>% select( Data, Scenario, Intervention, .model, mean, CI )


ft <- flextable( summary.data )

ft = bg( ft , i = ~ grepl( 'Impact', `Intervention` ), bg = "lightgrey")

# Merge the 'Group' column vertically to visually separate the groups
ft <- merge_v( ft, j = ~ Data)
ft <- merge_v( ft, j = ~ Scenario)

# Add borders between the groups for clear demarcation
ft <- border(ft, border.top = officer::fp_border(width = 2),
 part = "body")

# Add a border to the header
ft <- border(ft, border.top = officer::fp_border(width = 2), part = "header")


 # Apply conditional formatting to color negative numbers red and positive numbers blue
numeric_columns <- names( summary.data )[ map_lgl( summary.data , is.numeric ) ]


for (col in numeric_columns) {

 # Apply numeric formatting (e.g., 2 decimal places)
 ft <- colformat_double(
 x = ft,
 j = col,
 digits = 1
 )

 # Apply color formatting for each cell based on whether the number is positive or negative
 for (i in seq_len(nrow(m)) ) {

 ft <- flextable::compose( ft,
 i = i,
 j = col,
 value = as_paragraph(
 if ( m[[col]][i] < 0 ) {
 as_chunk( m[[col]][i], props = officer::fp_text(color = "red"))
 } else {
 as_chunk( m[[col]][i], props = officer::fp_text(color = "black"))
 }
 )
 )
 }


}


# Display the flextable
ft = ft %>% FitFlextableToPage()

# Adjust font size to 10 for the entire flextable
ft <- fontsize(ft, size = 10, part = "all") # Apply font size to header, body, and footer
ft <- line_spacing(ft, space = 0.8, part = "all") # Decrease line spacing (0.8 is tighter spacing)


ft

| Data | Scenario | Intervention | .model | mean | CI |
| --- | --- | --- | --- | --- | --- |
| Raw | Under5 | Comparison | aent | -6.2 | (-28.8,14.2) |
| Implementing | aent | -9.4 | (-23.6,2.49) |
| Impact (1-36 months) | Implementing - Comparison | -3.2 | (-29.1,23.9) |
| Over4 | Comparison | en | -65.3 | (-71.2,-59) |
| Implementing | en | -70.1 | (-77.2,-62.9) |
| Impact (1-36 months) | Implementing - Comparison | -4.8 | (-14.2,4.58) |
| Under5 with Over4 covariate | Comparison | a | -9.9 | (-15.9,-4.2) |
| Implementing | a | 9.6 | (2.62,16.2) |
| Impact (1-36 months) | Implementing - Comparison | 19.5 | (10.6,27.9) |
| Cleaned | Under5 | Comparison | aent | 0.4 | (-9.07,9.62) |
| Implementing | aent | -10.2 | (-24.8,1.85) |
| Impact (1-36 months) | Implementing - Comparison | -10.6 | (-26.4,6.28) |
| Over4 | Comparison | aen | -63.2 | (-67.3,-59) |
| Implementing | aen | -68.8 | (-76.4,-62.3) |
| Impact (1-36 months) | Implementing - Comparison | -5.6 | (-13.7,3.11) |
| Under5 with Over4 covariate | Comparison | antp4 | 20.2 | (17.8,22.5) |
| Implementing | antp4 | 17.4 | (15.1,19.6) |
| Impact (1-36 months) | Implementing - Comparison | -2.8 | (-6.06,0.42) |
| Cleaned and  consistently  reporting | Under5 | Comparison | p8 | -37.1 | (-41.2,-32.5) |
| Implementing | p8 | -54.3 | (-57.9,-51) |
| Impact (1-36 months) | Implementing - Comparison | -17.1 | (-22.6,-11.7) |
| Over4 | Comparison | p8 | -80.2 | (-81.6,-78.7) |
| Implementing | p8 | -85.7 | (-87,-84.6) |
| Impact (1-36 months) | Implementing - Comparison | -5.5 | (-7.51,-3.72) |
| Under5 with Over4 covariate | Comparison | ant | -2.3 | (-4.36,-0.107) |
| Implementing | ant | -13.8 | (-15.1,-12.5) |
| Impact (1-36 months) | Implementing - Comparison | -11.5 | (-14.1,-9.14) |
| alwaysReporting2015 | Comparison | ant | -1.6 | (-3.79,0.668) |
| Implementing | ant | -12.3 | (-14.3,-10.3) |
| Impact (1-36 months) | Implementing - Comparison | -10.6 | (-13.5,-7.66) |
| PrimaryOnly | Comparison | p8 | 3.5 | (-1.46,8.48) |
| Implementing | p8 | -11.8 | (-14.1,-9.33) |
| Impact (1-36 months) | Implementing - Comparison | -15.2 | (-21.2,-10) |
| Optimized | Comparison | an | -2.7 | (-5.35,0.0599) |
| Implementing | nt | -19.0 | (-20.3,-17.5) |
| Impact (1-36 months) | Implementing - Comparison | -16.3 | (-19.4,-13.2) |
| Near Comparison | Comparison | ant | -6.9 | (-9.48,-4.32) |
| Implementing | ant | -13.8 | (-15.1,-12.5) |
| Impact (1-36 months) | Implementing - Comparison | -6.9 | (-9.99,-4.27) |
| Far Comparison | Comparison | ant | -2.1 | (-4.52,0.149) |
| Implementing | ant | -13.8 | (-15.1,-12.5) |
| Impact (1-36 months) | Implementing - Comparison | -11.7 | (-14.5,-9.22) |

### - focus on model subtracting change in comparison areas from change in implementing areas.


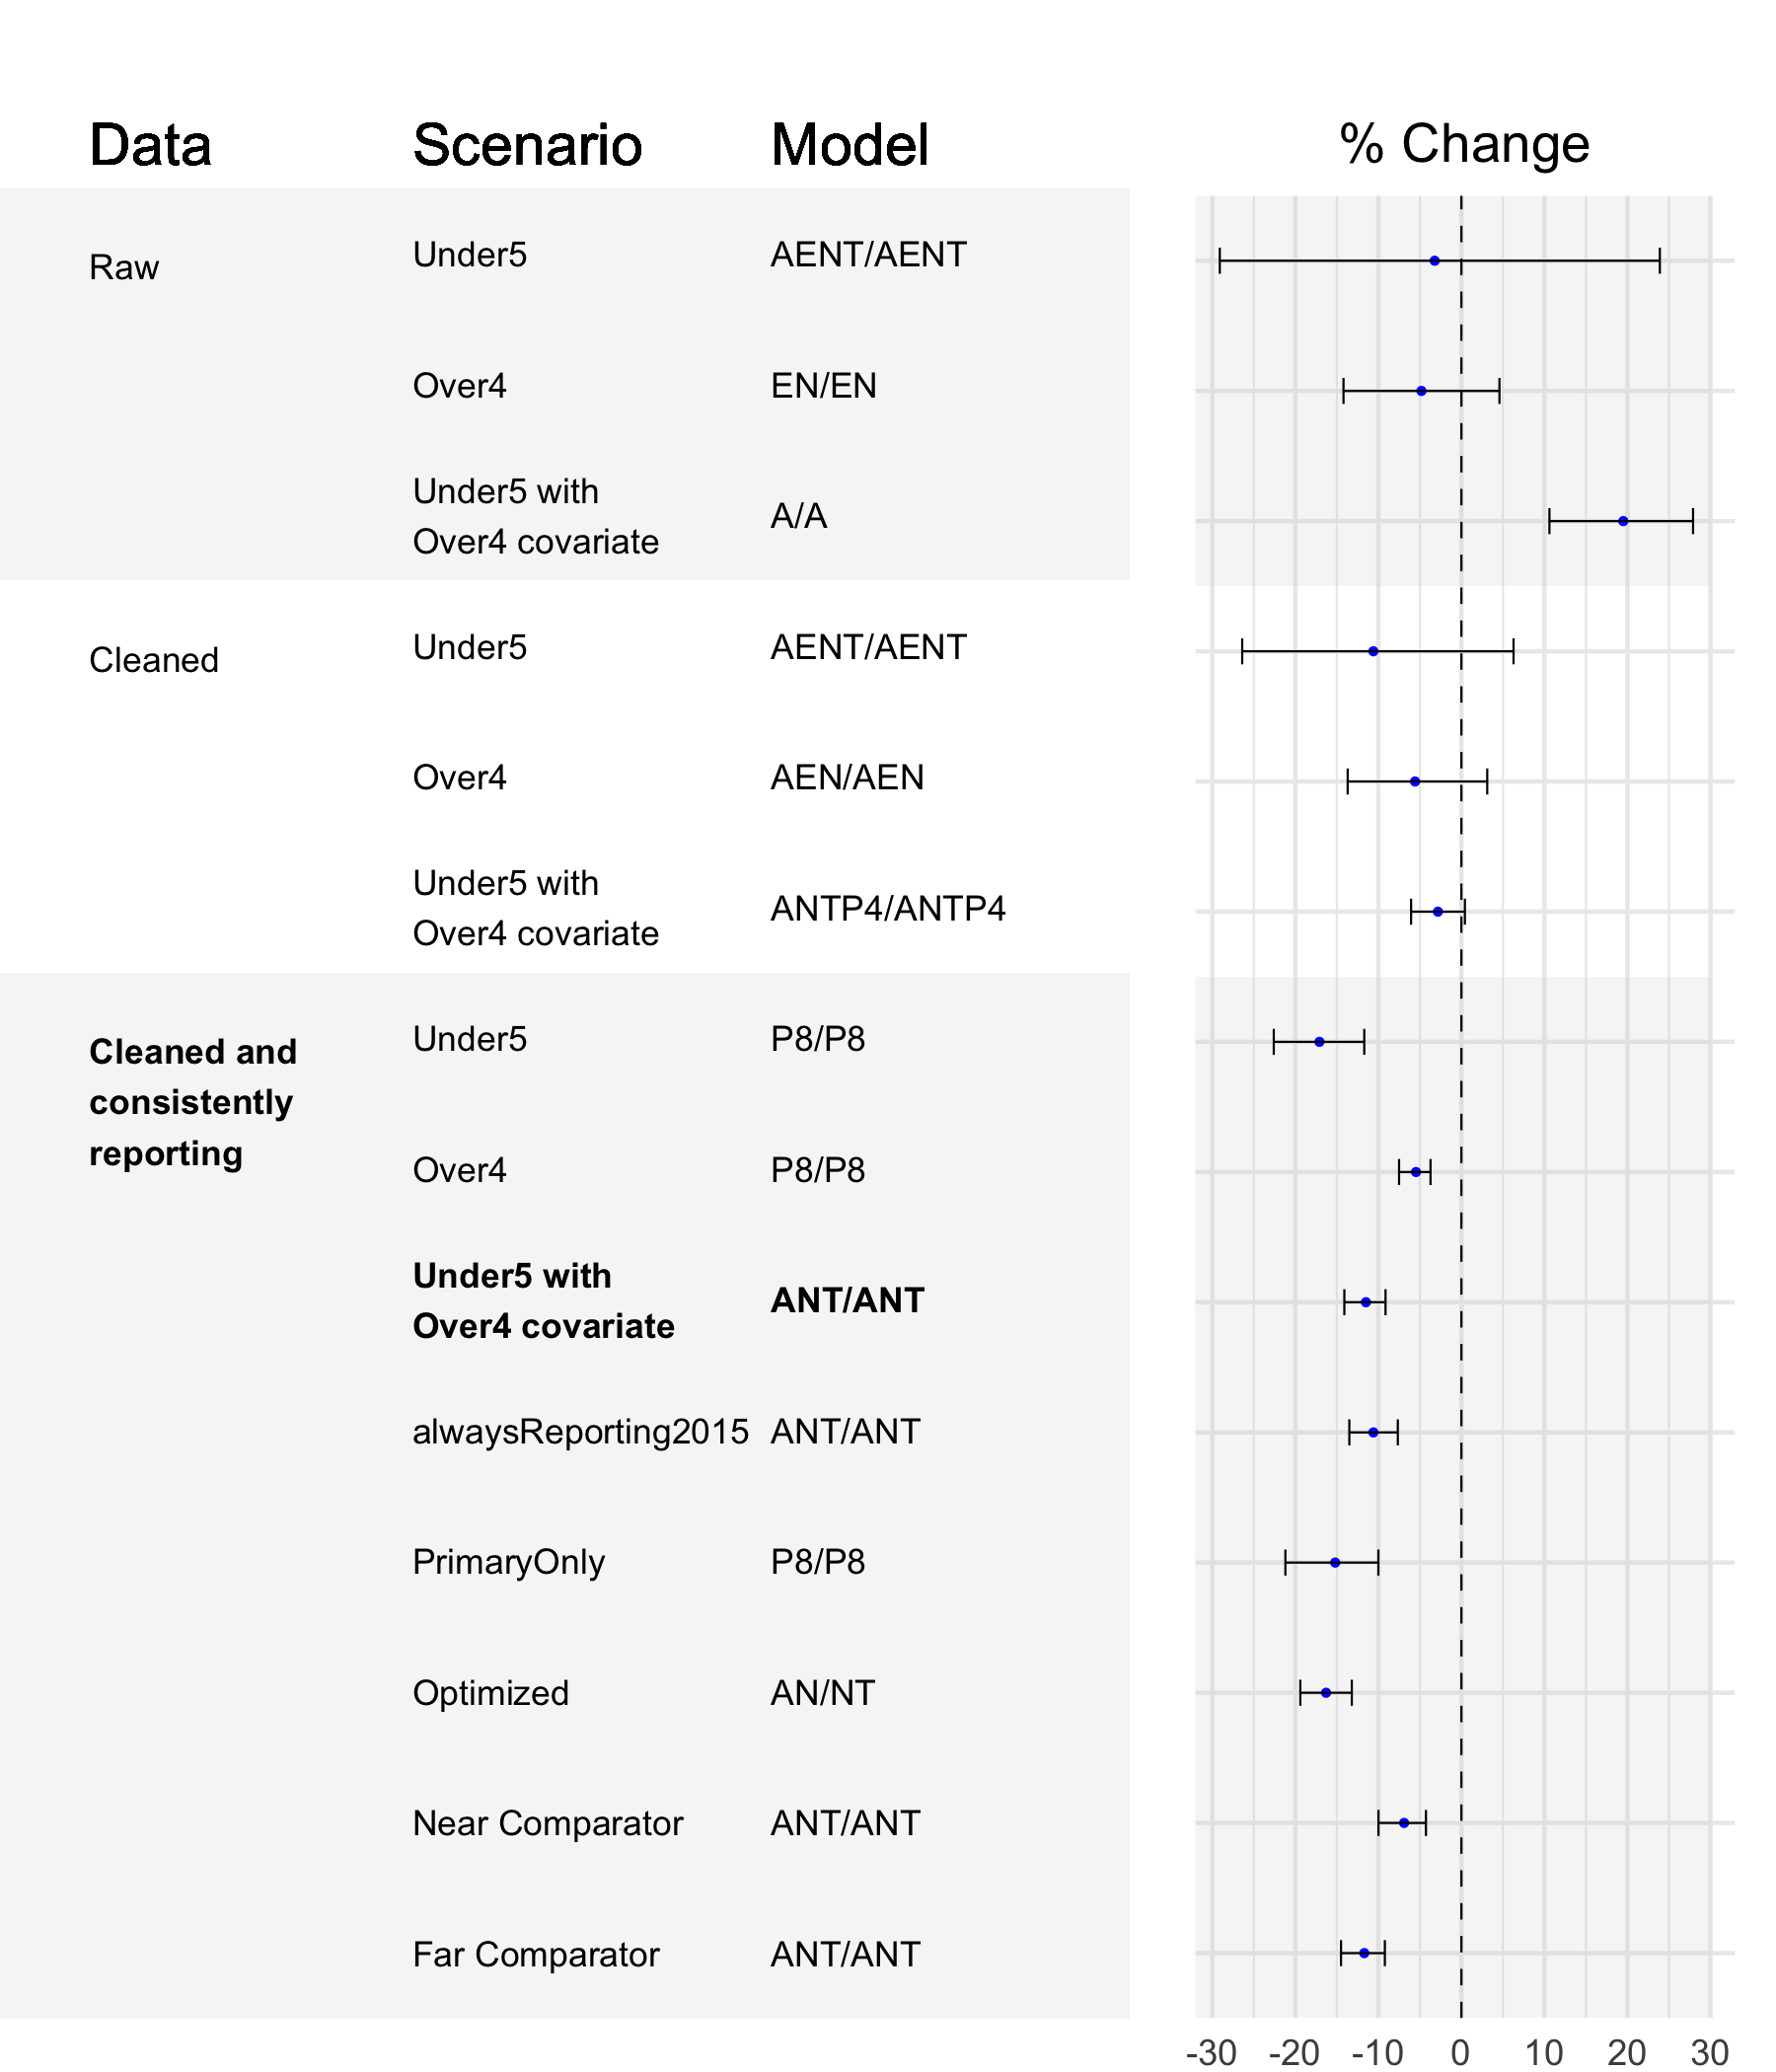


# **References**

1. RStudio Team. RStudio: Integrated Development Environment for R. Boston, MA: RStudio, PBC.; 2020.

2. Rts T, Partnership (2014) SCT. [Efficacy and Safety of the RTS,S/AS01 Malaria Vaccine during 18 Months after Vaccination: A Phase 3 Randomized, Controlled Trial in Children and Young Infants at 11 African Sites](https://doi.org/10.1371/journal.pmed.1001685). PLOS Medicine. 2014;11:e1001685.

3. RTS SCTP. [Efficacy and safety of RTS,S/AS01 malaria vaccine with or without a booster dose in infants and children in Africa: Final results of a phase 3, individually randomised, controlled trial](https://doi.org/10.1016/S0140-6736(15)60721-8). The Lancet. 2015;386:31–45.

4. Introduction - DHIS2 Documentation. https://docs.dhis2.org/en/develop/using-the-api/dhis-core-version-240/introduction.html;

5. Organisation Units - DHIS2 Documentation. https://docs.dhis2.org/en/implement/database-design/organisation-units.html;

6. List of hospitals in Kenya. Wikipedia. 2024;

7. Moturi AK, Suiyanka L, Mumo E, Snow RW, Okiro EA, Macharia PM. [Geographic accessibility to public and private health facilities in Kenya in 2021: An updated geocoded inventory and spatial analysis](https://doi.org/10.3389/fpubh.2022.1002975). Frontiers in Public Health. 2022;10.

8. Martin JL, Mosha FW, Lukole E, Rowland M, Todd J, Charlwood JD, et al. [Personal protection with PBO-pyrethroid synergist-treated nets after 2 years of household use against pyrethroid-resistant Anopheles in Tanzania](https://doi.org/10.1186/s13071-021-04641-5). Parasites & Vectors. 2021;14:150.

9. Cheng J, Schloerke B, Karambelkar B, Xie Y. Leaflet: Create interactive web maps with the JavaScript ’leaflet’ library. 2024; Available from: <https://CRAN.R-project.org/package=leaflet>

10. Wang E, Cook D, Hyndman RJ. A new tidy data structure to support exploration and modeling of temporal data. 2020;29:466–78. Available from: <https://doi.org/10.1080/10618600.2019.1695624>

11. 5.8 evaluating point forecast accuracy | forecasting: Principles and practice (3rd ed) [Internet]. Available from: <https://otexts.com/fpp3/accuracy.html>

12. 5.10 time series cross-validation | forecasting: Principles and practice (3rd ed) [Internet]. Available from: <https://otexts.com/fpp3/tscv.html>

13. Hyndman RJ, Athanasopoulos G. Forecasting: Principles and practice, 3rd edition. This online version of the book was last updated on 22 March 2024. OTexts;

14. 5.1 a tidy forecasting workflow | forecasting: Principles and practice (3rd ed) [Internet]. Available from: <https://otexts.com/fpp3/a-tidy-forecasting-workflow.html>

15. Hyndman RJ. Forecasting ensembles and combinations. https://pkg.robjhyndman.com/combinations_talk/ensembles_uscdc_2022.html#/title-slide; 2022.

16. 5.1 a tidy forecasting workflow | forecasting: Principles and practice (3rd ed) [Internet]. Available from: <https://otexts.com/fpp3/a-tidy-forecasting-workflow.html>

17. Hewamalage H, Ackermann K, Bergmeir C. Forecast Evaluation for Data Scientists: Common Pitfalls and Best Practices.

18. Linden A, Adams JL, Roberts N. [Evaluating Disease Management Program Effectiveness: An Introduction to Time-Series Analysis](https://doi.org/10.1089/109350703322682559). Disease Management. 2003;6:243–55.

19. Kolassa S. Answer to "what are the shortcomings of the mean absolute percentage error (MAPE)?" [Internet]. 2017. Available from: <https://stats.stackexchange.com/a/299713>

20. Kolassa S. [Why the “best” point forecast depends on the error or accuracy measure](https://doi.org/10.1016/j.ijforecast.2019.02.017). International Journal of Forecasting. 2020;36:208–11.

21. Kolassa S. Answer to "RMSE or MAPE? Which one to choose for accuracy?" [Internet]. 2021. Available from: <https://stats.stackexchange.com/a/554440>
